# Supplementary material
Source: MDPI journal article supplement (https://www.mdpi.com/2304-6775/8/3/39)
Supplement: s1 [file s1]

## Sheet: README
Content	Source	Date	Total Titles	Sample Size	Note
e-Scholarship Publishing (UC System)	https://escholarship.org/journals	2020.06.13	85	23	copy and paste from site pages
Society for Neuroscience	https://www.sfn.org/publications	2020.06.13	2	2
EER	http://evolutionary-ecology.com/	2020.06.27	1	1
Elsevier	http://www.sherpa.ac.uk/romeo/browse.php?colour=all&fIDnum=|&mode=simple&letter=E	2020.06.13	2588	30	screen scraping: Elsevier + Elsevier Cell Press (not Elsevier Espana, not Elsevier Masson)
Elsevier Embargoes	https://www.elsevier.com/about/open-science/open-access/journal-embargo-finder/journal-embargo-finder-results?meta_t=biophysical+journal&meta_s=&meta_i=&meta_w=&embargo=true&start_rank=1&fmo=1&meta_w_not=n.a.				not downloaded; just searched site
Elsevier APCs (2020 May 31)	https://www.elsevier.com/about/open-science/open-access and also https://www.elsevier.com/__data/promis_misc/j.custom97.xlsx				downloaded xlsx
Sample size calculations:	https://www.calculator.net/sample-size-calculator.html	95% confidence, 18% margin error, 50% population proportion, # sample size
Random Number Generator (random sequence):	https://www.random.org/
eScholarship Numbers	Elsevier Numbers
74	289
75	1584
18	2116
45	532
59	1213
8	2343
82	1374
28	1582
24	2194
27	2031
31	898
11	1088
73	1550
19	2
84	199
79	448
80	733
4	828
6	1058
20	192
60	969
17	2438
9	935
65	1355
53	365
81	2514
32	57
35	1557
	1166
	591
	1863
	1870
	2246
	1154
	808
	470
	1904
	1995
	301
	1739
	1266
	686
	5
	1294

## Sheet: ElsevierAll
American Journal of Human Genetics	9297-02-01	1537-6605	Special Policy: 6 month embargo	Cell Press			289
Biophysical Journal	3495-06-01	1542-0086	Biophysical Society;Special Policy: 12 month embargo	Cell Press	XXX63495		1584
Cancer Cell	1535-6108	1878-3686	Special Policy: 12 month embargo	Cell Press			2116
Cell	0092-8674	1097-4172	Special Policy: 12 month embargo	Cell Press			532
Cell Chemistry Biology	1074-5521	-	Special Policy: 12 month embargo	Cell Press			1213
Cell Host and Microbe	1931-3128	1934-6069	Special Policy: 12 month embargo	Cell Press			2343
Cell Metabolism	1550-4131	1932-7420	Special Policy: 12 month embargo	Cell Press			1374
Cell Reports	2211-1247	-	Special Policy: OAJ	Cell Press			1582
Cell Stem Cell	1934-5909	1875-9777	Special Policy: 12 month embargo	Cell Press			2194
Cell Systems	-	2405-4712	Special Policy: 12 month embargo	Cell Press			2031
Chem	-	2451-9294	-	Cell Press			898
Current Biology	0960-9822	1879-0445	Special Policy: 12 month embargo	Cell Press			1088
Developmental Cell	1534-5807	1878-1551	-	Cell Press			1550
Immunity	1074-7613	1097-4180	-	Cell Press			2
iScience	-	2589-0042	Special Policy: OAJ	Cell Press			199
Molecular Cell	1097-2765	1097-4164	Special Policy: 12 month embargo	Cell Press			448
Molecular Plant	-	1674-2052	Special Policy: 12 month embargo	Cell Press			733
Molecular Therapy	1525-0016	1525-0024	American Society of Gene and Cell Therapy;Special Policy: 12 month embargo	Cell Press			828
Molecular Therapy - Methods and Clinical Development	-	2329-0501	Special Policy: OAJ	Cell Press			1058
Molecular Therapy - Nucleic Acids	-	2162-2531	American Society of Gene and Cell Therapy;Special Policy: OAJ	Cell Press			192
Molecular Therapy - Oncolytics	-	2372-7705	Special Policy: OAJ	Cell Press			969
Neuron	0896-6273	1097-4199	Special Policy: 12 month embargo	Cell Press			2438
Stem Cell Reports	-	2213-6711	Special Policy: OAJ	Cell Press			935
Structure	0969-2126	1878-4186	-	Cell Press			1355
Trends in Biochemical Sciences	0968-0004	0167-7640	Trends	Cell Press			365
Trends in Biotechnology	0167-7799	1879-3096	Trends	Cell Press			2514
Trends in Cancer	-	2405-8033	-	Cell Press			57
Trends in Cell Biology	0962-8924	1879-3088	Trends	Cell Press			1557
Trends in Cognitive Sciences	1364-6613	1879-307X	Trends	Cell Press			1166
Trends in Ecology and Evolution	0169-5347	1872-8383	Trends	Cell Press			591
Trends in Endocrinology and Metabolism	1043-2760	1879-3061	Trends	Cell Press			1863
Trends in Genetics	0168-9525	1362-4555	Trends	Cell Press			1870
Trends in Immunology	1471-4906	1471-4981	Trends	Cell Press			2246
Trends in Microbiology	0966-842X	1878-4380	Trends	Cell Press			1154
Trends in Molecular Medicine	1471-4914	1471-499X	Trends	Cell Press			808
Trends in Neurosciences	0166-2236	1878-108X	Trends	Cell Press			470
Trends in Parasitology	1471-4922	1471-5007	Trends	Cell Press			1904
Trends in Pharmacological Sciences	0165-6147	1873-3735	Trends	Cell Press			1995
Trends in Plant Science	1360-1385	1878-4372	Trends	Cell Press			301
Acta Agronomica Sinica	1875-2780	-	Crop Science Society of China;Chinese Academy of Agricultural Sciences, Institute of Crop Sciences	Elsevier			1739
AASRI Procedia	2212-6716	-	American Applied Sciences Research Institute	Elsevier			1266
Abstract Bulletin of Paper Science and Technology	1523-388X	-	Engineering Information (Ei);Elsevier Masson	Elsevier			686
Academic Pediatrics	1876-2859	-	Special Policy: 12 months;Academic Pediatric Association	Elsevier			5
Academic Radiology	1076-6332	-	Special Policy: 12 months;Association of University Radiologists;Society of Chairs of Academic Radiology Departments;Association of Program Directors in Radiology;American Alliance of Academic Chief Residents in Radiology;Alliance of Medical Student Educators in Radiology;Radiology Research Alliance;Radiology Alliance for Health Services Research;Medical Image Computing and Computer-Assisted Inte…	Elsevier			1294
ACC Current Journal Review	1062-1458	-	Elsevier Masson;American College of Cardiology	Elsevier
Accident Analysis and Prevention	4575-01-01	-	Association for the Advancement of Automative Medicine	Elsevier
Accident and Emergency Nursing	0965-2302	-	-	Elsevier
Accounting, Organizations and Society	0361-3682	-	Special Policy: 24 months	Elsevier
Acta Anaesthesiologica Taiwanica	1875-4597	-	-	Elsevier
Acta Astronautica	0094-5765	-	-	Elsevier
Acta Automatica Sinica	1874-1029	-	Chinese Academy of Sciences, Institute of Automation;Chinese Association of Automation	Elsevier
Acta Biomaterialia	1742-7061	1878-7568	Acta Materialia	Elsevier
Acta Ecologica Sinica	1872-2032	-	-	Elsevier
Acta Genetica Sinica	0379-4172	-	-	Elsevier
Acta Haematologica Polonica	5814-01-01	-	Special Policy: 12 months	Elsevier
Acta Histochemica	0065-1281	-	Urban and Fischer;Special Policy: 12 months	Elsevier
Acta Materialia	1359-6454	-	Acta Materialia Inc;Pergamon	Elsevier
Acta Mathematica Scientia	0252-9602	-	Science Press	Elsevier
Acta Mechanica Solida Sinica	0894-9166	-	-	Elsevier
Acta Oecologica	1146-609X	-	-	Elsevier
Acta Otorrinolaringologica	2173-5735	-	Special Policy: 12 months	Elsevier
Acta OtorrinolaringolÃ³gica EspaÃ±ola	6519-01-01	1988-3013	Sociedad EspaÃ±ola de OtorrinolaringologÃ­a y PatologÃ­a CÃ©rvico-Facial (SEORL);Special Policy: 12 months	Elsevier
Acta Pharmaceutica Sinica B	2211-3835	-	Chinese Academy of Medical Sciences, Institute of Materia Medica;Chinese Pharmaceutical Association;Special Policy: Creative Commons Attribution Non-Commercial No-Derivatives License	Elsevier
Acta Physico-Chimica Sinica	1872-1508	-	-	Elsevier
Acta Psychologica	6918-01-01	-	-	Elsevier
Acta SociolÃ³gica	-	0186-6028	Special Policy: Creative Commons Attribution Non-Commercial No-Derivatives License	Elsevier
Acta Tropica	0001-706X	-	Special Policy: 12 months	Elsevier
Acta UrolÃ³gica Portuguesa	-	2341-4022	Special Policy: Creative Commons Attribution Non-Commercial No-Derivatives License	Elsevier
Actas Dermo-SifiliogrÃ¡ficas	7310-01-01	1578-2190	Academia EspaÃ±ola de DermatologÃ­ay VenereologÃ­a;Special Policy: 12 months	Elsevier
Actas UrolÃ³gicas EspaÃ±olas	0210-4806	1699-7980	AsociaciÃ³n EspaÃ±ola de UrologÃ­a (AEU);American Urology Confederation;Special Policy: 12 months	Elsevier
Actas UrolÃ³gicas EspaÃ±olas (English Edition)	2173-5786	-	Special Policy: 12 months	Elsevier
ActualitÃ©s Pharmaceutiques	0515-3700	-	Special Policy: 12 months	Elsevier
ActualitÃ©s Pharmaceutiques HospitaliÃ¨res	1769-7344	-	-	Elsevier
Acupuncture and Related Therapies	2211-7660	-	Urban and Fischer;Special Policy: 12 months	Elsevier
Acute Pain	1366-0071	-	-	Elsevier
Ad Hoc Networks	1570-8705	-	-	Elsevier
Addictive Behaviors	0306-4603	-	-	Elsevier
Addictive Behaviors Reports	-	2352-8532	Special Policy: Creative Commons Licenses	Elsevier
Additive Manufacturing	2214-7810	2214-8604	-	Elsevier
Advanced Drug Delivery Reviews	0169-409X	1872-8294	Special Policy: 12 months	Elsevier
Advanced Engineering Informatics	1474-0346	-	-	Elsevier
Advanced Powder Technology	0921-8831	1568-5527	-	Elsevier
Advances in Accounting	0882-6110	-	-	Elsevier
Advances in Anesthesia	0737-6146	-	Mosby;Special Policy: 12 months	Elsevier
Advances in Applied Mathematics	0196-8858	-	Academic Press	Elsevier
Advances in Biological Regulation	-	2212-4926	Special Policy: 12 months	Elsevier
Advances in Chronic Kidney Disease	1548-5595	-	Special Policy: 12 months	Elsevier
Advances in Colloid and Interface Science	8686-01-01	1095-7103	-	Elsevier
Advances In Computers	0065-2458	-	Academic Press	Elsevier
Advances in Ecological Research	0065-2504	-	-	Elsevier
Advances in Engineering Software	0965-9978	-	-	Elsevier
Advances in Enzyme Regulation	0065-2571	-	Pergamon	Elsevier
Advances in Heart and Lung Transplantation	1930-2134	-	-	Elsevier
Advances in Imaging and Electron Physics	1076-5670	-	Academic Press;Special Policy: Monograph Series	Elsevier
Advances in Integrative Medicine	-	2212-9626	-	Elsevier
Advances in Life Course Research	1040-2608	-	-	Elsevier
Advances in Mathematics	8708-01-01	-	Academic Press;Elsevier Masson	Elsevier
Advances in Medical Sciences	-	1898-4002	Special Policy: 12 months;Medical University of Bialystok;De Gruyter Open	Elsevier
Advances in Pediatrics	0065-3101	-	Mosby;Special Policy: 12 months	Elsevier
Advances in Radiation Oncology	-	2452-1094	Special Policy: Creative Commons Attribution Non-Commercial No-Derivatives License	Elsevier
Advances in Small Animal Medicine and Surgery	1041-7826	-	Special Policy: 12 months	Elsevier
Advances in Space Research	0273-1177	-	Pergamon;Committee on Space Research (COSPAR)	Elsevier
Advances in Surgery	0065-3411	-	Mosby;Special Policy: 12 months	Elsevier
Advances in Vascular Surgery	1069-7292	-	Elsevier Masson	Elsevier
Advances in Water Resources	0309-1708	-	Elsevier Masson	Elsevier
Adverse Reactions Titles (Section 38 EMBASE)	8848-01-01	-	Elsevier Masson	Elsevier
Australasian Emergency Nursing Journal	1574-6267	-	College of Emergency Nursing Australasia	Elsevier
Aeolian Research	1875-9637	-	International Society for Aeolian Research;Elsevier Masson	Elsevier
Aerospace Science and Technology	1270-9638	-	Elsevier Masson	Elsevier
Aesthetische Zahnmedizin	1434-6087	-	Urban and Fischer	Elsevier
AEÃœ - International Journal of Electronics and Communications / Archiv fÃ¼r Elektronik und Ãœbertragungstechnik	1434-8411	-	Urban and Fischer;Elsevier Masson;Deutsche Physikalische Gesellschaft;Gesellschaft fÃ¼r Angewandte Mathematik und Mechanik;Verband der Elektrotechnik, Elektronik und Informationstechnik (VDE);Informationstechnische Gesellschaft (ITG) im VDE	Elsevier
Annales FranÃ§aises d'AnesthÃ©sie et de RÃ©animation	0750-7658	0750-7658	SociÃ©tÃ© franÃ§aise d'anesthÃ©sie et de rÃ©animation (Sfar);Elsevier Masson	Elsevier
African Journal of Emergency Medicine	2211-419X	-	African Federation for Emergency Medicine;Special Policy: Creative Commons Attribution Non-Commercial No-Derivatives License	Elsevier
African Journal of Urology	1110-5704	1961-9987	Special Policy: Creative Commons Attribution Non-Commercial No-Derivatives License;Springer Verlag (Germany)	Elsevier
Ageing Research Reviews	1568-1637	-	Special Policy: 12 months	Elsevier
Agriculture and Agricultural Science Procedia	-	2210-7843	Special Policy: Creative Commons Attribution Non-Commercial No-Derivatives License	Elsevier
Aide Soignante	1166-3413	-	-	Elsevier
Ain Shams Engineering Journal	2090-4479	-	Ain Shams University;Special Policy: Creative Commons Attribution Non-Commercial No-Derivatives License	Elsevier
Air Medical Journal	1067-991X	-	Mosby;Special Policy: 12 months	Elsevier
American Journal of Infection Control	0196-6553	-	Mosby;Special Policy: 12 months	Elsevier
American Journal of Kidney Diseases	0272-6386	-	National Kidney Foundation;Special Policy: 12 months	Elsevier
Alexandria Engineering Journal	1110-0168	-	Alexandria University, Faculty of Engineering;Special Policy: Creative Commons Attribution Non-Commercial No-Derivatives License	Elsevier
Alexandria Journal of Medicine	2090-5068	2090-5068	Alexandria University, Faculty of Medicine;Special Policy: Creative Commons Attribution Non-Commercial No-Derivatives License	Elsevier
Algal Research	2211-9264	-	-	Elsevier
All Clinics Online	1876-2751	-	-	Elsevier
Allergologia et Immunopathologia	0301-0546	1578-1267	Sociedad EspaÃ±ola de InmunologÃ­a ClÃ­nica y AlergologÃ­a PediÃ¡trica;Special Policy: 12 months	Elsevier
Allergology International	1323-8930	1440-1592	Japanese Society of Allergology;Special Policy: Creative Commons Attribution Non-Commercial No-Derivatives License;Wiley	Elsevier
ALTER. European Journal of Disability research, Journal europÃ©en de recherche sur le handicap	1875-0672	-	Special Policy: 12 months	Elsevier
Alzheimer's and Dementia	1552-5260	-	Alzheimer's Association;Special Policy: 12 months	Elsevier
Alzheimer's and Dementia: Translational Research and Clinical Interventions	-	2352-8737	Special Policy: Creative Commons Attribution Non-Commercial No-Derivatives License	Elsevier
American Heart Journal	8703-02-01	-	Mosby;Special Policy: 12 months	Elsevier
American Journal of Cardiology	9149-02-01	-	Special Policy: 12 months	Elsevier
American Journal of Geriatric Pharmacotherapy	1543-5946	-	-	Elsevier
American Journal of Geriatric Psychiatry	1064-7481	1545-7214	Special Policy: 12 months;American Association for Geriatric Psychiatry;Lippincott, Williams & Wilkins	Elsevier
American Journal of Medicine	9343-02-01	-	Association of Professors of Medicine;Special Policy: 12 months	Elsevier
American Journal of Obstetrics and Gynecology	9378-02-01	-	Mosby;Special Policy: 12 months	Elsevier
American Journal of Ophthalmology	9394-02-01	-	Special Policy: 12 months	Elsevier
American Journal of Orthodontics and Dentofacial Orthopedics	0889-5406	-	American Association of Orthodontists;Special Policy: 12 months	Elsevier
American Journal of Pathology	9440-02-01	1525-2191	Special Policy: 12 months;American Society for Investigative Pathology (ASIP);Association for Molecular Pathology (AMP)	Elsevier
American Journal of Preventive Medicine	0749-3797	-	American College of Preventive Medicine;Association for Prevention Teaching and Research;Special Policy: 12 months	Elsevier
American Journal of Surgery	9610-02-01	-	Southwestern Surgical Congress;North Pacific Surgical Association;Association for Surgical Education;Association of Women Surgeons;Association of VA Surgeons;Midwest Surgical Association;Society of Black Academic Surgeons (SBAS);Special Policy: 12 months	Elsevier
Anaerobe	1075-9964	-	Japanese Accociation for Anaerobic Infection Research;Anaerobe Society of the Americas;Special Policy: 12 months	Elsevier
Anaesthesia, Critical Care and Pain Medicine	-	2352-5568	Special Policy: 12 months	Elsevier
Anales de CirugÃ­a Vascular	1130-2542	1989-0842	Special Policy: 12 months	Elsevier
Anales de PediatrÃ­a	1695-4033	-	AsociaciÃ³n EspaÃ±ola de PediatrÃ­a (AEP);Special Policy: 12 months	Elsevier
Anales de PediatrÃ­a Continuada	1696-2818	1696-4608	Special Policy: 12 months	Elsevier
Analytica Chimica Acta	2670-03-01	-	Special Policy: 12 months	Elsevier
Anesthesiology Clinics	1932-2275	-	Special Policy: 12 months	Elsevier
AngiologÃ­a	3170-03-01	1695-2987	Sociedad EspaÃ±ola de AngiologÃ­a y CirugÃ­a Vascular;Special Policy: 12 months	Elsevier
Animal Feed Science and Technology	0377-8401	-	Special Policy: 12 months	Elsevier
Animal Nutrition	-	2405-6545	Special Policy: Creative Commons Attribution Non-Commercial No-Derivatives License;Science Press;Ke Ai;Chinese Association of Animal Science and Veterinary Medicine	Elsevier
Annales d'Endocrinologie	4266-03-01	-	SociÃ©tÃ© FranÃ§aise d'Endocrinologie;Special Policy: 12 months	Elsevier
Annales de Cardiologie et d'AngÃ©iologie	3928-03-01	-	Special Policy: 12 months	Elsevier
Annales de Chirurgie Plastique EsthÃ©tique	0294-1260	-	Special Policy: 12 months;SociÃ©tÃ© FranÃ§aise de Chirurgie Plastique Reconstructrice et EsthÃ©tique;SociÃ©tÃ© FranÃ§aise des Chirurgiens EsthÃ©tiques Plasticiens	Elsevier
Annales de l'Institut Henri Poincare (C) Non Linear Analysis	0294-1449	-	Institute Henri PoincarÃ©	Elsevier
Annales de PalÃ©ontologie	-	0753-3969	Special Policy: 12 months	Elsevier
Annales de Pathologie	0242-6498	-	SociÃ©tÃ© FranÃ§aise de Cytologie Clinique;SociÃ©tÃ© FranÃ§aise de Pathologie;Special Policy: 12 months	Elsevier
Annales de RÃ©adaptation et de MÃ©decine Physique	-	0168-6054	-	Elsevier
Annales franÃ§aises d'oto-rhino-laryngologie et de pathologie cervico-faciale	-	1879-7261	-	Elsevier
Annales MÃ©dico-psychologiques, revue psychiatrique	4487-03-01	4487-03-01	SociÃ©tÃ© MÃ©dico-Psychologique;Special Policy: 12 months	Elsevier
Annales Pharmaceutiques FranÃ§aises	4509-03-01	-	AcadÃ©mie Nationale de Pharmacie;Special Policy: 12 months	Elsevier
Annales Scientifiques de l'Ã‰cole Normale SupÃ©rieure	-	9593-12-01	-	Elsevier
Annals of Agricultural Sciences	0570-1783	-	Ain-Shams University, Faculty of Agriculture;Special Policy: Creative Commons Attribution Non-Commercial No-Derivatives License	Elsevier
Annals of Allergy, Asthma and Immunology	1081-1206	-	Special Policy: 12 months;American College of Allergy, Asthma and Immunology	Elsevier
Annals of Anatomy	0940-9602	-	Urban and Fischer;Special Policy: 12 months	Elsevier
Annals of Diagnostic Pathology	1092-9134	-	Special Policy: 12 months	Elsevier
Annals of Emergency Medicine	0196-0644	-	Mosby;Special Policy: 12 months	Elsevier
Annals of Epidemiology	1047-2797	-	Special Policy: 12 months;American College of Epidemiology	Elsevier
Annals of Physical and Rehabilitation Medicine	1877-0657	-	SociÃ©tÃ© FranÃ§aise de RÃ©adaptation et de MÃ©decine Physique (Sofmer);Special Policy: 12 months	Elsevier
Annals of the ICRP	0146-6453	-	International Commission on Radiological Protection;Pergamon	Elsevier
Annals of Thoracic Surgery	4975-03-01	-	Society of Thoracic Surgeons;Southern Thoracic Surgical Association	Elsevier
Annals of Vascular Surgery	0890-5096	1615-5947	French Society for Vascular Surgery;Peripheral Vascular Surgery Society, USA;Southern California Vascular Surgical Society;Vascular Interventional Advances (VIVA);Vascular Society of India;Vascular Surgeons of Spanish Language;Special Policy: 12 months	Elsevier
Annual Reports on NMR Spectroscopy	0066-4103	-	Academic Press	Elsevier
Annual Reviews in Control	1367-5788	-	Pergamon;International Federation of Automatic Control (IFAC)	Elsevier
Anthropocene	2213-3054	-	-	Elsevier
Anthropologie	5521-03-01	-	-	Elsevier
AORN Journal	2092-01-01	-	Association of PeriOperative Registered Nurses (AORN);Special Policy: 12 months	Elsevier
APCBEE Procedia	2212-6708	-	Asia-Pacific Chemical, Biological and Environmental Engineering Society	Elsevier
Apollo Medicine	0976-0016	-	Special Policy: 12 months	Elsevier
Appetite	0195-6663	-	-	Elsevier
Applied Acoustics	0003-682X	-	-	Elsevier
Applied and Computational Harmonic Analysis	1063-5203	-	-	Elsevier
Applied and Preventive Psychology	0962-1849	-	-	Elsevier
Applied and Translational Genomics	-	2212-0661	-	Elsevier
Applied Animal Behaviour Science	0168-1591	-	International Society for Applied Ethology (ISAE);Special Policy: 12 months	Elsevier
Applied Catalysis A: General	0926-860X	-	-	Elsevier
Applied Catalysis B: Environmental	0926-3373	-	-	Elsevier
Applied Clay Science	0169-1317	-	-	Elsevier
Applied Computing and Informatics	2210-8327	-	King Suad University;Special Policy: Creative Commons Attribution Non-Commercial No-Derivatives License	Elsevier
Applied Energy	0306-2619	-	-	Elsevier
Applied Ergonomics	6870-03-01	-	International Ergonomics Association;Ergonomics Society	Elsevier
Applied Geochemistry	0883-2927	-	International Association of GeoChemistry	Elsevier
Applied Geography	0143-6228	-	-	Elsevier
Applied Mathematical Modelling	0307-904X	-	-	Elsevier
Applied Mathematics and Computation	0096-3003	-	-	Elsevier
Applied Mathematics Letters	0893-9659	-	Pergamon	Elsevier
Applied Numerical Mathematics	0168-9274	-	International Association for Mathematics and Computers in Simulation (IMACS);North-Holland Publishing	Elsevier
Applied Nursing Research	0897-1897	-	Special Policy: 12 months	Elsevier
Applied Ocean Research	0141-1187	-	-	Elsevier
Applied Radiation and Isotopes	0969-8043	-	-	Elsevier
Applied Soft Computing	1568-4946	-	World Federation on Soft Computing (WFSC)	Elsevier
Applied Soil Ecology	0929-1393	-	-	Elsevier
Applied Surface Science	0169-4332	-	North-Holland Publishing	Elsevier
Applied Thermal Engineering	1359-4311	-	-	Elsevier
Apunts Medicina de l'Esport	0213-3717	1886-6581	Consell CatalÃ de l'Esport;Special Policy: 12 months	Elsevier
Aquacultural Engineering	0144-8609	-	Aquacultural Engineering Society (AES)	Elsevier
Aquaculture	0044-8486	-	-	Elsevier
Aquatic Botany	0304-3770	-	Special Policy: 24 months	Elsevier
Aquatic Procedia	2214-241X	-	Special Policy: Creative Commons Attribution Non-Commercial No-Derivatives License	Elsevier
Aquatic Toxicology	0166-445X	-	-	Elsevier
Arab Journal of Gastroenterology	1687-1979	-	Special Policy: 12 months	Elsevier
Arab Journal of Mathematical Sciences	1319-5166	-	King Saud University;Special Policy: Creative Commons Attribution Non-Commercial No-Derivatives License	Elsevier
Arab Journal of Urology	2090-598X	-	Arab Association of Urology;Special Policy: Creative Commons Attribution Non-Commercial No-Derivatives License	Elsevier
Arabian Journal of Chemistry	1878-5352	-	King Saud University;Special Policy: Creative Commons Attribution Non-Commercial No-Derivatives License	Elsevier
Archaeological Research in Asia	-	2352-2267	Special Policy: 24 months	Elsevier
Archaeology, Ethnology and Anthropology of Eurasia / Arkheologija, Ehtnografija i Antropologija Evrazii	1563-0110	1531-832X	MAIK Nauka/Interperiodica (ÐœÐÐ˜Ðš ÐÐ°ÑƒÐºÐ°/Ð˜Ð½Ñ‚ÐµÑ€Ð¿ÐµÑ€Ð¸Ð¾Ð´Ð¸ÐºÐ°);Springer Verlag (Germany)	Elsevier
Archives de PÃ©diatrie	0929-693X	-	Special Policy: 12 months	Elsevier
Archives des Maladies du Coeur et des Vaisseaux - Pratique	1261-694X	-	Special Policy: 12 months	Elsevier
Archives des Maladies Professionnelles et de L'Environnement	1775-8785	-	SociÃ©tÃ©s de MÃ©decine du Travail;Special Policy: 12 months	Elsevier
Archives of Biochemistry and Biophysics	9861-03-01	-	Special Policy: 12 months	Elsevier
Archives of Cardiovascular Diseases	1875-2136	-	French Society of Cardiology;Special Policy: 12 months	Elsevier
Archives of Cardiovascular Diseases Supplements	1878-6480	-	French Society of Cardiology;Special Policy: 12 months	Elsevier
Archives of Civil and Mechanical Engineering	1644-9665	-	Special Policy: 12 months	Elsevier
Archives of Clinical Neuropsychology	0887-6177	1873-5843	National Academy of Neuropsychology	Elsevier
Archives of Gerontology and Geriatrics	0167-4943	-	Special Policy: 12 months	Elsevier
Archives of Medical Research	0188-4409	-	Instituto Mexicano del Seguro Social (IMSS);Special Policy: 12 months	Elsevier
Archives of Oral Biology	9969-03-01	-	Special Policy: 12 months	Elsevier
Archives of Physical Medicine and Rehabilitation	9993-03-01	-	American Congress of Rehabilitation Medicine;Special Policy: 12 months;WB Saunders	Elsevier
Archives of Psychiatric Nursing	0883-9417	-	SERPN Division of the International Society of Psychiatric-Mental Health Nurses;Special Policy: 12 months	Elsevier
Archivos de BronconeumologÃ­a	0300-2896	-	Special Policy: 12 months	Elsevier
Archivos de BronconeumologÃ­a (English Edition)	-	1579-2129	Sociedad EspaÃ±ola de NeumologÃ­a y CirugÃ­a TorÃ¡cica (SEPAR);AsociaciÃ³n Sudamericana de CirugÃ­a TorÃ¡cica (ASCT);AsociaciÃ³n Latinoamericana del TÃ³rax (ALAT);Special Policy: 12 months	Elsevier
Archivos de la Sociedad EspaÃ±ola de OftalmologÃ­a	0365-6691	1989-7286	Sociedad EspaÃ±ola de OftalmologÃ­a;Special Policy: 12 months	Elsevier
Archivos de la Sociedad EspaÃ±ola de OftalmologÃ­a (English Edition)	2173-5794	-	Sociedad EspaÃ±ola de OftalmologÃ­a;Special Policy: 12 months	Elsevier
Area Pediatrica	1591-0075	-	SocietÃ Italiana di Pediatria	Elsevier
Artery Research	1872-9312	-	Association for Research into Arterial Structure and Physiology;Special Policy: 12 months	Elsevier
Arthritis and Rheumatism (Section 31 EMBASE)	0014-4355	-	EMBASE	Elsevier
Arthropod Structure and Development	1467-8039	-	Special Policy: 12 months	Elsevier
Arthroscopy Techniques	2212-6287	-	Special Policy: 12 months	Elsevier
Arthroscopy: The Journal of Arthroscopy and Related Surgery	0749-8063	-	Arthroscopy Association of North America;International Society of Arthroscopy, Knee Surgery, and Orthopaedic Sports Medicine;Special Policy: 12 months	Elsevier
Artificial Intelligence	3702-04-01	-	-	Elsevier
Artificial Intelligence in Medicine	0933-3657	-	Special Policy: 12 months	Elsevier
Arts in Psychotherapy	0197-4556	-	-	Elsevier
Ã„rzteblatt ThÃ¼ringen	0863-5412	-	Urban and Fischer	Elsevier
Asian Journal of Oral and Maxillofacial Surgery	0915-6992	-	Asian Association of Oral and Maxillofacial Surgeons	Elsevier
Asian Journal of Psychiatry	1876-2018	-	Asian Federation of Psychiatric Associations;Special Policy: 12 months	Elsevier
Asian Journal of Shipping and Logistics	2092-5212	-	Special Policy: Creative Commons Attribution Non-Commercial No-Derivatives License	Elsevier
Asian Journal of Surgery	1015-9584	-	Special Policy: Creative Commons Attribution Non-Commercial No-Derivatives License	Elsevier
Asian Nursing Research	1976-1317	-	Special Policy: 12 months;Korean Society of Nursing Science	Elsevier
Asian Pacific Journal of Tropical Biomedicine	2221-1691	-	Special Policy: 12 months	Elsevier
Asian Pacific Journal of Tropical Disease	2222-1808	-	Hainan Medical College;Special Policy: 12 months	Elsevier
Asian Pacific Journal of Tropical Medicine	1995-7645	2352-4146	Medknow Publications;Hainan Medical University, Institute of Tropical Disease;Special Policy: 12 months	Elsevier
Assessing Writing	1075-2935	-	-	Elsevier
Astroparticle Physics	0927-6505	-	North-Holland Publishing	Elsevier
AtenciÃ³n Primaria	0212-6567	-	-	Elsevier
Atherosclerosis	0021-9150	-	Special Policy: 12 months;European Atherosclerosis Society;Society of Atherosclerosis Imaging and Prevention;International Atherosclerosis Society	Elsevier
Atlas of The Oral and Maxillofacial Surgery Clinics of North America	1061-3315	-	Special Policy: 12 months	Elsevier
Atmospheric Environment	1352-2310	-	-	Elsevier
Atmospheric Research	0169-8095	-	-	Elsevier
Atomic Data and Nuclear Data Tables	0092-640X	-	Academic Press	Elsevier
Auris Nasus Larynx	0385-8146	-	Oto-Rhino-Laryngological Society of Japan;Special Policy: 12 months	Elsevier
Australasian Marketing Journal	1441-3582	-	Australian and New Zealand Marketing Academy (ANZMAC)	Elsevier
Australian Critical Care	1036-7314	-	Australian College of Critical Care Nurses(ACCCN)	Elsevier
Autoimmunity Reviews	1568-9972	-	Special Policy: 12 months	Elsevier
Automatica	0005-1098	-	Pergamon;International Federation of Automatic Control (IFAC)	Elsevier
Automation in Construction	0926-5805	-	-	Elsevier
Autonomic Neuroscience: Basic and Clinical	1566-0702	-	International Society for Autonomic Neuroscience;Special Policy: 12 months	Elsevier
Avances en DiabetologÃ­a	1134-3230	-	-	Elsevier
Basal Ganglia	2210-5336	-	Lega Italiana per la Lotta Contro la Malattia di Parkinson (LIMPE);Special Policy: 12 months	Elsevier
Basic and Applied Ecology	1439-1791	-	Gesellschaft fÃ¼r Ã–kologie (Ecological Society of Germany, Austria and Switzerland);Urban and Fischer	Elsevier
Biochimica et Biophysica Acta Molecular and Cell Biology of Lipids	1388-1981	-	Special Policy: 12 months	Elsevier
BBA - Biochimica et Biophysica Acta	3002-06-01	-	-	Elsevier
BBA - Bioenergetics	2728-05-01	2728-05-01	-	Elsevier
BBA - Biomembranes	2736-05-01	-	-	Elsevier
BBA - Gene Regulatory Mechanisms	1874-9399	-	-	Elsevier
BBA - Gene Structure and Expression	0167-4781	-	-	Elsevier
BBA - General Subjects	0304-4165	-	-	Elsevier
BBA - Molecular Basis of Disease	0925-4439	-	-	Elsevier
BBA - Proteins and Proteomics	1570-9639	-	-	Elsevier
Behavior Therapy	7894-05-01	-	-	Elsevier
Behaviour Research and Therapy	7967-05-01	-	Special Policy: 24 months	Elsevier
Behavioural Brain Research	0166-4328	-	-	Elsevier
Behavioural Processes	0376-6357	-	-	Elsevier
Biomedical and Environmental Sciences	0895-3988	-	Special Policy: 12 months	Elsevier
Best Practice and Research: Clinical Anaesthesiology	1521-6896	-	Special Policy: 12 months	Elsevier
Best Practice and Research: Clinical Endocrinology and Metabolism	1521-690X	-	Special Policy: 12 months	Elsevier
Best Practice and Research: Clinical Gastroenterology	1521-6918	-	BailliÃ¨re Tindall;Special Policy: 12 months	Elsevier
Best Practice and Research: Clinical Haematology	1521-6926	-	Special Policy: 12 months	Elsevier
Best Practice and Research: Clinical Obstetrics and Gynaecology	1521-6934	-	Special Policy: 12 months	Elsevier
Best Practice and Research: Clinical Rheumatology	1521-6942	-	Special Policy: 12 months	Elsevier
Big Data Research	-	2214-5796	-	Elsevier
Biocatalysis and Agricultural Biotechnology	1878-8181	-	Special Policy: 12 months;nternational Society of Biocatalysis and Agricultural Biotechnology (ISBAB)	Elsevier
Biochemical and Biophysical Research Communications	0006-291X	-	Academic Press;Special Policy: 12 months	Elsevier
Biochemical Engineering Journal	1369-703X	-	-	Elsevier
Biochemical Pharmacology	2952-06-01	-	Special Policy: 12 months	Elsevier
Biochemical Systematics and Ecology	0305-1978	-	Pergamon	Elsevier
Biochimica et Biophysica Acta (BBA) - Molecular Cell Research	0167-4889	-	Special Policy: 12 months	Elsevier
Biochimica et Biophysica Acta (BBA) - Reviews on Cancer	0304-419X	-	Special Policy: 12 months	Elsevier
Biochimie	0300-9084	-	SociÃ©tÃ© FranÃ§aise de Biochimie et Biologie MolÃ©culaire;Special Policy: 12 months	Elsevier
Bioelectrochemistry	1567-5394	-	Bioelectrochemical Society	Elsevier
Bioethics UPdate	-	2395-938X	Special Policy: 24 months	Elsevier
Biological Conservation	3207-06-01	-	-	Elsevier
Biological Control	1049-9644	-	Academic Press;Special Policy: 12 months	Elsevier
Biological Psychiatry	3223-06-01	-	Society of Biological Psychiatry;Special Policy: 12 months	Elsevier
Biological Psychiatry: Cognitive Neuroscience and Neuroimaging	-	2451-9022	Special Policy: 12 months	Elsevier
Biological Psychology	0301-0511	-	Special Policy: 12 months	Elsevier
Biologically Inspired Cognitive Architectures	2212-683X	-	-	Elsevier
Biologicals	1045-1056	-	Academic Press;Special Policy: 12 months;International Association for Biologicals	Elsevier
Biology of Blood and Marrow Transplantation	1083-8791	-	American Society for Blood and Marrow Transplantation;Special Policy: 12 months	Elsevier
Biomass and Bioenergy	0961-9534	-	-	Elsevier
Biomaterials	0142-9612	-	-	Elsevier
Biomedical Signal Processing and Control	1746-8094	-	-	Elsevier
BioMedicine	2211-8020	-	-	Elsevier
Biomedicine and Aging Pathology	2210-5220	-	-	Elsevier
Biomedicine and Pharmacotherapy	0753-3322	-	Special Policy: 12 months	Elsevier
Biomedicine and Preventive Nutrition	2210-5239	-	-	Elsevier
Biometric Technology Today	0969-4765	-	Elsevier Advanced Technology	Elsevier
Bioorganic and Medicinal Chemistry	0968-0896	-	-	Elsevier
Bioorganic and Medicinal Chemistry Letters	0960-894X	-	-	Elsevier
Bioorganic Chemistry	0045-2068	-	Academic Press	Elsevier
Biophysical Chemistry	0301-4622	-	Special Policy: 24 months	Elsevier
Biophysics, Bioengineering and Medical Instrumentation (Section 27 EMBASE)	0014-4312	-	-	Elsevier
Bioresource Technology	0960-8524	-	-	Elsevier
Bioscience Hypotheses	1756-2392	-	-	Elsevier
Biosensors and Bioelectronics	0956-5663	-	-	Elsevier
BioSystems	0303-2647	-	Special Policy: 12 months	Elsevier
Biosystems Engineering	1537-5110	-	Academic Press	Elsevier
Biotechnology Advances	0734-9750	-	Special Policy: 12 months	Elsevier
Biotribology	-	2352-5738	-	Elsevier
British Journal of Anaesthesia	0007-0912	1471-6771	Special Policy: Policy B - Oxford Open Option B	Elsevier
Blood Cells, Molecules and Diseases	1079-9796	-	Academic Press;Special Policy: 12 months	Elsevier
Blood Reviews	0268-960X	-	Special Policy: 12 months	Elsevier
Body Image	1740-1445	-	-	Elsevier
BoletÃ­n de AELFA	1137-8174	-	-	Elsevier
BONE	8756-3282	-	International Bone and Mineral Society;Special Policy: 12 months	Elsevier
Brachytherapy	1538-4721	-	American Brachytherapy Society;Special Policy: 12 months	Elsevier
Brain and Cognition	0278-2626	-	Special Policy: 12 months	Elsevier
Brain and Development	-	0387-7604	Special Policy: 12 months	Elsevier
Brain and Language	0093-934X	-	Special Policy: 12 months	Elsevier
Brain, Behavior, and Immunity	0889-1591	-	Psychoneuroimmunology Research Society (PNIRS);Special Policy: 12 months	Elsevier
Brain Research	8993-06-01	-	Special Policy: 12 months	Elsevier
Brain Research Bulletin	0361-9230	-	Special Policy: 12 months	Elsevier
Brain Research Reviews	0165-0173	-	-	Elsevier
Brain Stimulation	1935-861X	-	Special Policy: 12 months	Elsevier
Brazilian Journal of Anesthesiology / Revista Brasileira de Anestesiologia	0034-7094	-	Brazilian Society of Anesthesiology;Special Policy: Creative Commons Attribution Non-Commercial No-Derivatives License	Elsevier
Brazilian Journal of Infectious Diseases	1413-8670	-	Brazilian Society of Infectious Diseases	Elsevier
Brazilian Journal of Rheumatology / Revista Brasileira de Reumatologia	0482-5004	-	Brazilian Society of Rheumatology	Elsevier
Breast	0960-9776	-	SenoNetwork;Churchill Livingstone;European Society of Breast Cancer Specialists (EUSOMA)	Elsevier
Breast Diseases	1043-321X	-	Mosby;Special Policy: 12 months	Elsevier
British Accounting Review	0890-8389	-	Special Policy: 24 months	Elsevier
British Journal of Medical and Surgical Urology	1875-9742	-	British Association of Urological Surgeons (BAUS)	Elsevier
British Journal of Oral and Maxillofacial Surgery	0266-4356	-	British Association of Oral and Maxillofacial Surgeons;Churchill Livingstone;Special Policy: 12 months	Elsevier
British Journal of Plastic Surgery	0007-1226	-	-	Elsevier
Building and Environment	0360-1323	-	-	Elsevier
Bulletin de l'AcadÃ©mie Nationale de MÃ©decine	4079-01-01	-	-	Elsevier
Bulletin de L'Ordre des MÃ©decins	0030-4565	-	-	Elsevier
Bulletin des Sciences MathÃ©matiques	4497-07-01	-	-	Elsevier
Bulletin du Cancer	4551-07-01	1769-6917	SociÃ©tÃ© FranÃ§aise du Cancer;Special Policy: 12 months;John Libbey Eurotext	Elsevier
Bulletin of Faculty of Pharmacy, Cairo University	1110-0931	-	Cairo University, Faculty of Pharmacy	Elsevier
Burnout Research	-	2213-0586	Special Policy: Creative Commons	Elsevier
Burns	0305-4179	-	International Society for Burn Injuries;Special Policy: 12 months	Elsevier
Business Horizons	6813-07-01	-	Special Policy: 36 months;Indiana University, Kelley School of Business	Elsevier
Butterworths Journal of International Banking and Financial Law	0269-2694	-	LexisNexis	Elsevier
Cahiers de la PuÃ©ricultrice	9820-07-01	-	-	Elsevier
Cahiers de Nutrition et de DiÃ©tÃ©tique	9960-07-01	-	-	Elsevier
Clinical and Applied Immunology Reviews	1529-1049	-	Association of Medical Laboratory Immunologists	Elsevier
Calphad	0364-5916	-	-	Elsevier
Canadian Association of Radiologists Journal	0846-5371	-	Canadian Association of Radiologists;Special Policy: 12 months	Elsevier
Canadian Journal of Cardiology	0828-282X	1916-7075	Canadian Cardiovascular Society;Special Policy: 12 months;Pulsus	Elsevier
Canadian Journal of Diabetes	1499-2671	-	Canadian Diabetes Association;Special Policy: 12 months	Elsevier
Canadian Journal of Ophthalmology / Journal canadien d'ophtalmologie	1715-3360	-	Special Policy: 12 months	Elsevier
Cancer (Section 16 EMBASE)	0014-4207	-	-	Elsevier
Cancer Detection and Prevention	0361-090X	-	-	Elsevier
Cancer Epidemiology	1877-7821	-	Special Policy: 12 months	Elsevier
Cancer Genetics	2210-7762	-	Special Policy: 12 months	Elsevier
Cancer Genetics and Cytogenetics	0165-4608	-	-	Elsevier
Cancer Letters	0304-3835	-	Special Policy: 12 months	Elsevier
Cancer RadiothÃ©rapie	1278-3218	-	Special Policy: 12 months	Elsevier
Cancer Treatment Communications	2213-0896	2213-0896	Special Policy: Cancer Treatment Communications	Elsevier
Cancer Treatment Reviews	0305-7372	-	Special Policy: 12 months	Elsevier
Carbohydrate Polymers	0144-8617	-	Special Policy: 12 months	Elsevier
Carbohydrate Research	6215-08-01	-	-	Elsevier
Carbon	6223-08-01	-	American Carbon Society	Elsevier
Card Technology Today	0965-2590	-	Elsevier Advanced Technology	Elsevier
Cardiac Electrophysiology Clinics	1877-9182	-	Special Policy: 12 months	Elsevier
Cardiocore	1889-898X	2171-6528	Sociedad Andaluza de CardiologÃ­a;Special Policy: 12 months	Elsevier
Cardiology Clinics	0733-8651	-	Special Policy: 12 months	Elsevier
Cardiovascular Diseases and Cardiovascular Surgery (Section 18 EMBASE)	0014-4223	-	EMBASE	Elsevier
Cardiovascular Pathology	1054-8807	-	Society for Cardiovascular Pathology;Special Policy: 12 months	Elsevier
Cardiovascular Revascularization Medicine	1553-8389	-	Special Policy: 12 months	Elsevier
Case Manager	1061-9259	-	-	Elsevier
Case Studies in Engineering Failure Analysis	2213-2902	2213-2902	Special Policy: Creative Commons	Elsevier
Case Studies in Thermal Engineering	-	2214-157X	Special Policy: Creative Commons	Elsevier
Case Studies on Transport Policy	2213-624X	-	-	Elsevier
Catalysis Communications	1566-7367	-	-	Elsevier
Catalysis Today	0920-5861	-	-	Elsevier
CATENA	0341-8162	1872-6887	-	Elsevier
Cell Calcium	0143-4160	-	Special Policy: 12 months	Elsevier
Cellular and Molecular Gastroenterology and Hepatology	-	2352-345X	Special Policy: Creative Commons Attribution Non-Commercial No-Derivatives License	Elsevier
Cellular Immunology	8749-08-01	-	Special Policy: 12 months	Elsevier
Cellular Signalling	0898-6568	-	Special Policy: 12 months	Elsevier
Cement and Concrete Composites	0958-9465	-	-	Elsevier
Cement and Concrete Research	8846-08-01	-	Pergamon	Elsevier
Ceramics International	0272-8842	-	-	Elsevier
Cerevisia	1373-7163	-	Associations of Former Students of Belgian Schools of Brewing Sciences	Elsevier
Clinical Gastroenterology and Hepatology	1542-3565	-	AGA Institute;Special Policy: 12 months	Elsevier
Chaos, Solitons and Fractals	0960-0779	-	-	Elsevier
Chemical Engineering and Processing: Process Intensification	0255-2701	-	-	Elsevier
Chemical Engineering Journal	1385-8947	-	-	Elsevier
Chemical Engineering Research and Design	0263-8762	-	European Federation of Chemical Engineering;Institution of Chemical Engineers	Elsevier
Chemical Engineering Science	2509-09-01	-	Pergamon	Elsevier
Chemical Geology	2541-09-01	-	European Association of Geochemistry	Elsevier
Chemical Physics	0301-0104	-	-	Elsevier
Chemical Physics Letters	2614-09-01	-	-	Elsevier
Chemical Research in Chinese Universities	1005-9040	-	-	Elsevier
Chemico-Biological Interactions	2797-09-01	-	Special Policy: 12 months;International Society for the Study of Xenobiotics	Elsevier
Chemie der Erde / Geochemistry	2819-09-01	-	Urban and Fischer	Elsevier
Chemistry and Physics of Lipids	3084-09-01	-	Special Policy: 12 months	Elsevier
Chemometrics and Intelligent Laboratory Systems	0169-7439	-	Chemometrics Society	Elsevier
Chemosphere	0045-6535	-	Pergamon	Elsevier
Chest	3692-12-01	1931-3543	Special Policy: 12 months;American College of Chest Physicians (ACCP)	Elsevier
Chest Diseases, Thoracic Surgery and Tuberculosis (Section 15 EMBASE)	0014-4193	-	EMBASE	Elsevier
Chest Physician	1558-6200	-	-	Elsevier
Child Abuse and Neglect	0145-2134	-	International Society for Prevention of Child Abuse and Neglect	Elsevier
Child and Adolescent Psychiatric Clinics of North America	1056-4993	-	Special Policy: 12 months	Elsevier
Children and Youth Services Review	0190-7409	-	-	Elsevier
China Economic Review	1043-951X	-	Chinese Economists Society	Elsevier
China Journal of Accounting Research	1755-3091	-	Sun Yat-sen University	Elsevier
China Population, Resources and Environment	1872-583X	-	-	Elsevier
Chinese Astronomy and Astrophysics	0275-1062	-	Pergamon	Elsevier
Chinese Chemical Letters	1001-8417	-	Chinese Chemical Society	Elsevier
Chinese Journal of Aeronautics	1000-9361	-	-	Elsevier
Chinese Journal of Analytical Chemistry	1872-2040	-	Chinese Chemical Society;Chinese Academy of Sciences, Changchun Institute of Applied Chemistry	Elsevier
Chinese Journal of Catalysis	1872-2067	-	-	Elsevier
Chinese Journal of Chemical Engineering	1004-9541	-	Chemical Industry and Engineering Society of China	Elsevier
Chinese Journal of Chromatography	1872-2059	-	-	Elsevier
Chinese Journal of Natural Medicines	1875-5364	-	China Pharmaceutical University;Chinese Pharmaceutical Association	Elsevier
Chinese Journal of Traumatology (English Edition)	1008-1275	-	Chinese Medical Association, Traumatology branch;Special Policy: 12 months	Elsevier
Chinese Medical Sciences Journal	1001-9294	-	Special Policy: 12 months	Elsevier
Chirurgie de la Main	1297-3203	-	SociÃ©tÃ© FranÃ§aise de Chirurgie de la Main (GEM);SociÃ©tÃ© suisse de chirurgie de la main et du Belgian Hand Group	Elsevier
CIRP Annals - Manufacturing Technology	8506-07-01	-	CIRP (International Academy for Production Engineering)	Elsevier
CIRP Journal of Manufacturing Science and Technology	1755-5817	-	CIRP (International Academy for Production Engineering)	Elsevier
CirugÃ­a EspaÃ±ola	0009-739X	1578-147X	AsociaciÃ³n EspaÃ±ola de Cirujanos;Special Policy: 12 months	Elsevier
CirugÃ­a EspaÃ±ola (English Edition)	2173-5077	-	Special Policy: 12 months	Elsevier
Cities	0264-2751	-	-	Elsevier
City, Culture and Society	1877-9166	-	-	Elsevier
Climate Risk Management	2212-0963	2212-0963	Special Policy: Creative Commons	Elsevier
Clinica Chimica Acta	8981-09-01	-	Special Policy: 12 months	Elsevier
ClÃ­nica e InvestigaciÃ³n en Arteriosclerosis	0214-9168	1578-1879	Sociedad Latinoamericana de Aterosclerosis;Sociedad EspaÃ±ola de Arteriosclerosis;Sociedad Iberolatinoamericana de Aterosclerosis (SILAT);Special Policy: 12 months	Elsevier
ClÃ­nica e InvestigaciÃ³n en GinecologÃ­a y Obstetricia	0210-573X	1578-9349	Special Policy: 12 months	Elsevier
Clinical and Experimental Biochemistry (Section 29 EMBASE)	0927-278X	-	-	Elsevier
Clinical and Experimental Pharmacology (Section 30 EMBASE)	0927-2798	-	-	Elsevier
Clinical Biochemistry	9120-09-01	-	Canadian Society of Clinical Chemists;Special Policy: 12 months	Elsevier
Clinical Biomechanics	0268-0033	-	Special Policy: 12 months;International Society of Biomechanics;American Society of Biomechanics;European Society of Biomechanics;Taiwanese Society for Biomechanics	Elsevier
Clinical Breast Cancer	1526-8209	-	Special Policy: 12 months	Elsevier
Clinical Chiropractic	1479-2354	-	College of Chiropractors	Elsevier
Clinical Colorectal Cancer	1533-0028	-	Special Policy: 12 months	Elsevier
Clinical Cornerstone	1098-3597	-	Excerpta Media	Elsevier
Clinical Endocrinology News	1558-0164	-	-	Elsevier
Clinical Genitourinary Cancer	1558-7673	-	Special Policy: 12 months	Elsevier
Clinical Imaging	0899-7071	-	Special Policy: 12 months	Elsevier
Clinical Immunology	1521-6616	-	Clinical Immunology Society;Federation of Clinical Immunology Societies (FOCIS);Academic Press;Special Policy: 12 months	Elsevier
Clinical Lung Cancer	1525-7304	-	Special Policy: 12 months	Elsevier
Clinical Lymphoma, Myeloma and Leukemia	2152-2650	-	Special Policy: 12 months	Elsevier
Clinical Microbiology and Infection	1198-743X	1469-0691	European Society of Clinical Microbiology and Infectious Diseases;Special Policy: 12 months;Special Policy: 12 months	Elsevier
Clinical Microbiology Newsletter	0196-4399	-	Special Policy: 12 months	Elsevier
Clinical Neurology and Neurosurgery	0303-8467	-	Special Policy: 12 months	Elsevier
Clinical Neurophysiology	1388-2457	-	International Federation of Clinical Neurophysiology;Italian Clinical Neurophysiology Society;Japanese Society of Clinical Neurophysiology;Brazilian Society of Clinical Neurophysiology;Special Policy: 12 months	Elsevier
Clinical Neuroscience Research	1566-2772	-	Association for Research in Nervous and Mental Disease	Elsevier
Clinical Nutrition	0261-5614	-	European Society for Parenteral and Enteral Nutrition (ESPEN);Special Policy: 12 months	Elsevier
Clinical Nutrition Supplements	1744-1161	-	European Society for Parenteral and Enteral Nutrition (ESPEN);Special Policy: 12 months	Elsevier
Clinical Oncology	0936-6555	-	Royal College of Radiologists;Special Policy: 12 months	Elsevier
Clinical Ovarian Cancer	1941-4390	-	Special Policy: 12 months	Elsevier
Clinical Pediatric Emergency Medicine	1522-8401	-	Special Policy: 12 months	Elsevier
Clinical Plasma Medicine	2212-8166	-	Urban and Fischer;Special Policy: 12 months	Elsevier
Clinical Psychiatry News	0270-6644	-	-	Elsevier
Clinical Psychology Review	0272-7358	-	Special Policy: 24 months	Elsevier
Clinical Queries: Nephrology	2211-9477	-	Special Policy: 12 months	Elsevier
Clinical Radiology	9260-09-01	1365-229X	Royal College of Radiologists;Special Policy: 12 months	Elsevier
Clinical Simulation in Nursing	1876-1399	-	International Nursing Association of Clinical and Simulated Learning (INACSL);Special Policy: 12 months	Elsevier
Clinical Therapeutics	0149-2918	-	Excerpta Medica;Special Policy: 12 months	Elsevier
Clinics and Research in Hepatology and Gastroenterology	2210-7401	-	Special Policy: 12 months	Elsevier
Clinics in Chest Medicine	0272-5231	-	Special Policy: 12 months	Elsevier
Clinics in Dermatology	0738-081X	-	International Academy of Cosmetic Dermatology (IACD);Special Policy: 12 months	Elsevier
Clinics in Geriatric Medicine	0749-0690	-	Special Policy: 12 months	Elsevier
Clinics in Laboratory Medicine	0272-2712	-	Special Policy: 12 months	Elsevier
Clinics in Liver Disease	1089-3261	-	Special Policy: 12 months	Elsevier
Clinics in Perinatology	0095-5108	-	Special Policy: 12 months	Elsevier
Clinics in Plastic Surgery	0094-1298	-	Special Policy: 12 months	Elsevier
Clinics in Podiatric Medicine and Surgery	0891-8422	-	Special Policy: 12 months	Elsevier
Clinics in Sports Medicine	0278-5919	-	Special Policy: 12 months	Elsevier
Computer Law and Security Review	0267-3649	-	Elsevier Advanced Technology	Elsevier
CME: Pet Clinics	1559-7814	-	-	Elsevier
CME Supplement to Clinics in Perinatology	1557-7864	-	-	Elsevier
CME Supplement to Critical Care Nursing Clinics of North America	1557-7880	-	-	Elsevier
CME Supplement to Dental Clinics of North America	1554-1959	-	-	Elsevier
CME Supplement to Emergency Medicine Clinics of North America	1557-8151	-	-	Elsevier
CME Supplement to Magnetic Resonance Imaging Clinics of North America	1557-8178	-	-	Elsevier
CME Supplement to Medical Clinics of North America	1557-8143	-	-	Elsevier
CME Supplement to Neuroimaging Clinics of North America	1557-8186	-	-	Elsevier
CME Supplement to Obstetrics and Gynecology Clinics	1557-816X	-	-	Elsevier
CME Supplement to Pediatric Clinics of North America	1557-8135	-	-	Elsevier
CME Supplement to Radiologic Clinics of North Americs	1557-7872	-	-	Elsevier
CME Supplement to Veterinary Clinics of North America: Equine Practice	1554-1967	-	-	Elsevier
CME Supplement to Veterinary Clinics of North America: Exotic Animal Practice	1554-1991	-	-	Elsevier
CME Supplement to Veterinary Clinics: Small Animal Practice	1554-1983	-	-	Elsevier
CME: Ultrasound Clinics	1559-7792	-	-	Elsevier
CMIGExtra: Cases	-	1572-3496	-	Elsevier
Coastal Engineering	0378-3839	-	-	Elsevier
Current Opinion in Colloid and Interface Science	1359-0294	-	-	Elsevier
Cognition	0010-0277	-	Special Policy: 12 months	Elsevier
Cognitive and Behavioral Practice	1077-7229	-	Special Policy: 24 months	Elsevier
Cognitive Development	0885-2014	-	Special Policy: 24 months	Elsevier
Cognitive Psychology	0010-0285	-	-	Elsevier
Cognitive Systems Research	1389-0417	-	-	Elsevier
Cold Regions Science and Technology	0165-232X	-	-	Elsevier
Collegian	1322-7696	-	Royal College of Nursing, Australia	Elsevier
Colloids and Surfaces A: Physicochemical and Engineering Aspects	0927-7757	-	-	Elsevier
Colloids and Surfaces B: Biointerfaces	0927-7765	-	-	Elsevier
Combinatorial Chemistry	1464-3383	-	-	Elsevier
Combustion and Flame	2180-10-01	-	Combustion Institute	Elsevier
Communications in Nonlinear Science and Numerical Simulation	1007-5704	-	-	Elsevier
Communist and Post-Communist Studies	0967-067X	-	-	Elsevier
Community Oncology	1548-5315	-	International Medical News Group	Elsevier
Comparative Biochemistry and Physiology	0010-406X	-	-	Elsevier
Comparative Biochemistry and Physiology - A: Comparative Physiology	0300-9629	-	-	Elsevier
Comparative Biochemistry and Physiology - B: Comparative Biochemistry	0305-0491	-	-	Elsevier
Comparative Biochemistry and Physiology - Part A: Molecular and Integrative Physiology	1095-6433	-	Special Policy: 12 months	Elsevier
Comparative Biochemistry and Physiology - Part A: Physiology	1096-4940	-	-	Elsevier
Comparative Biochemistry and Physiology - Part B: Biochemistry and Molecular Biology	1096-4959	-	Special Policy: 12 months	Elsevier
Comparative Biochemistry and Physiology - Part C: Comparative Pharmacology	0306-4492	-	-	Elsevier
Comparative Biochemistry and Physiology - Part C: Comparative Pharmacology and Toxicology	0742-8413	-	-	Elsevier
Comparative Biochemistry and Physiology - Part C: Pharmacology, Toxicology and Endocrinology	1367-8280	-	-	Elsevier
Comparative Biochemistry and Physiology - Part C: Toxicology and Pharmacology	1532-0456	-	Special Policy: 12 months	Elsevier
Comparative Biochemistry and Physiology - Part D: Genomics and Proteomics	1744-117X	-	Special Policy: 12 months	Elsevier
Comparative Immunology, Microbiology and Infectious Diseases	0147-9571	-	Special Policy: 12 months	Elsevier
Complementary Therapies in Clinical Practice	1744-3881	-	Churchill Livingstone;Special Policy: 12 months	Elsevier
Complementary Therapies in Medicine	0965-2299	-	Special Policy: 12 months	Elsevier
Composite Structures	0263-8223	-	-	Elsevier
Composites Part A: Applied Science and Manufacturing	1359-835X	-	-	Elsevier
Composites Part B: Engineering	1359-8368	1879-1069	-	Elsevier
Composites Science and Technology	0266-3538	1879-1050	-	Elsevier
Comprehensive Psychiatry	0010-440X	-	American Psychopathological Association;Special Policy: Creative Commons Attribution Non-Commercial No-Derivatives License	Elsevier
Comptes Rendus Biologies	1631-0691	-	Special Policy: 12 months	Elsevier
Comptes Rendus Chimie	1631-0748	-	Special Policy: 12 months	Elsevier
Comptes Rendus GÃ©oscience	1631-0713	-	French Academy of Sciences;Special Policy: 12 months	Elsevier
Comptes Rendus MathÃ©matique	1631-073X	-	French Academy of Sciences;Special Policy: 12 months	Elsevier
Comptes Rendus MÃ©canique	1631-0721	-	Special Policy: 12 months	Elsevier
Comptes Rendus Palevol	1631-0683	-	Special Policy: 12 months	Elsevier
Comptes Rendus Physique	1631-0705	-	Special Policy: 12 months	Elsevier
Computational and Structural Biotechnology Journal	-	2001-0370	Special Policy: Creative Commons Attribution	Elsevier
Computational and Theoretical Chemistry	2210-271X	-	-	Elsevier
Computational Biology and Chemistry	1476-9271	-	-	Elsevier
Computational Geometry	0925-7721	-	Special Policy: 12 months	Elsevier
Computational Materials Science	0927-0256	-	-	Elsevier
Computational Statistics and Data Analysis	0167-9473	-	International Association for Statistical Computing	Elsevier
Computational Toxicology	-	2468-1113	-	Elsevier
Computer Aided Chemical Engineering	1570-7946	-	Special Policy: Monograph Series	Elsevier
Computer-Aided Design	4485-10-01	-	-	Elsevier
Computer Aided Geometric Design	0167-8396	-	North-Holland Publishing	Elsevier
Computer Communications	0140-3664	-	-	Elsevier
Computer Fraud and Security	1361-3723	-	Elsevier Advanced Technology	Elsevier
Computer Languages, Systems and Structures	1477-8424	-	-	Elsevier
Computer Methods and Programs in Biomedicine	0169-2607	-	Special Policy: 12 months	Elsevier
Computer Methods in Applied Mechanics and Engineering	0045-7825	-	-	Elsevier
Computer Networks	1389-1286	-	North-Holland Publishing	Elsevier
Computer Physics Communications	4655-10-01	-	-	Elsevier
Computer Science Review	1574-0137	-	-	Elsevier
Computer Speech and Language	0885-2308	-	International Speech Communication Association (ISCA);Academic Press	Elsevier
Computer Standards and Interfaces	0920-5489	-	North-Holland	Elsevier
Computer Vision and Image Understanding	1077-3142	-	Academic Press	Elsevier
Computerized Medical Imaging and Graphics	0895-6111	1879-0771	Computerized Medical Imaging Society;Pergamon;Special Policy: 12 months	Elsevier
Computers and Chemical Engineering	0098-1354	-	-	Elsevier
Computers and Composition	8755-4615	-	-	Elsevier
Computers and Education	0360-1315	-	-	Elsevier
Computers and Electrical Engineering	0045-7906	-	-	Elsevier
Computers and Electronics in Agriculture	0168-1699	-	-	Elsevier
Computers and Fluids	0045-7930	-	-	Elsevier
Computers and Geosciences	0098-3004	-	-	Elsevier
Computers and Geotechnics	0266-352X	-	-	Elsevier
Computers and Graphics	0097-8493	-	-	Elsevier
Computers and Industrial Engineering	0360-8352	-	-	Elsevier
Computers and Mathematics with Applications	0898-1221	-	-	Elsevier
Computers and Operations Research	0305-0548	-	-	Elsevier
Computers and Security	0167-4048	-	-	Elsevier
Computers and Structures	0045-7949	-	-	Elsevier
Computers, Environment and Urban Systems	0198-9715	-	-	Elsevier
Computers in Biology and Medicine	4825-10-01	-	Pergamon;Special Policy: 12 months	Elsevier
Computers in Human Behavior	0747-5632	-	-	Elsevier
Computers in Industry	0166-3615	-	Special Policy: 24 months	Elsevier
Consciousness and Cognition	1053-8100	-	-	Elsevier
Construction and Building Materials	0950-0618	-	-	Elsevier
Contact Lens and Anterior Eye	1367-0484	-	British Contact Lens Association;Special Policy: 12 months	Elsevier
Contemporary Clinical Trials	1551-7144	-	Special Policy: 12 months	Elsevier
Contemporary Clinical Trials Communications	-	2451-8654	Special Policy: Creative Commons Licenses	Elsevier
Contemporary Educational Psychology	0361-476X	-	Special Policy: 24 months	Elsevier
Continental Shelf Research	0278-4343	-	Pergamon	Elsevier
Contraception	7824-10-01	-	Society of Family Planning;Association of Reproductive Health Professionals;Special Policy: 12 months	Elsevier
Control Engineering Practice	0967-0661	-	Pergamon;International Federation of Automatic Control (IFAC)	Elsevier
Coordination Chemistry Reviews	8545-10-01	-	-	Elsevier
Cor et Vasa	8650-10-01	-	Special Policy: 12 months;Czech Society of Cardiology;Czech Society for Cardiovascular Surgery	Elsevier
Core Journals in Cardiology	0165-9405	-	-	Elsevier
Core Journals in Clinical Neurology	0165-1056	-	-	Elsevier
Core Journals in Dermatology	0167-5796	-	-	Elsevier
Core Journals in Gastroenterology	0165-8719	-	-	Elsevier
Core Journals in Obstetrics/Gynecology	0376-5059	-	-	Elsevier
Core Journals in Ophthalmology	0165-1005	-	-	Elsevier
Core Journals in Pediatrics	0376-5040	-	-	Elsevier
Corrosion Science	0010-938X	-	Institute of Corrosion;Pergamon	Elsevier
Cortex	9452-10-01	-	-	Elsevier
COSPAR Information Bulletin	0045-8732	-	Committee on Space Research (COSPAR)	Elsevier
Cretaceous Research	0195-6671	-	Academic Press	Elsevier
Critical Care Clinics	0749-0704	-	Special Policy: 12 months	Elsevier
Critical Care Nursing Clinics of North America	0899-5885	-	Special Policy: 12 months	Elsevier
Critical Perspectives On Accounting	1045-2354	-	-	Elsevier
Critical Reviews in Oncology/Hematology	1040-8428	-	Special Policy: 12 months	Elsevier
Critical Reviews in Oncology/Hematology Online	-	-	-	Elsevier
Crop Protection	0261-2194	-	-	Elsevier
Cryobiology	2240-11-01	-	Society for Cryobiology Subject Matter;Academic Press	Elsevier
Cryogenics	2275-11-01	-	-	Elsevier
Current Advances in Applied Microbiology and Biotechnology	0964-8712	-	-	Elsevier
Current Advances in Cancer Research	0895-9803	-	-	Elsevier
Current Advances in Cell and Developmental Biology	0741-1626	-	-	Elsevier
Current Advances in Clinical Chemistry	0885-1980	-	-	Elsevier
Current Advances in Ecological and Environmental Sciences	0955-6648	-	-	Elsevier
Current Advances in Endocrinology and Metabolism	0964-8720	-	Cabs	Elsevier
Current Advances in Genetics and Molecular Biology	0741-1642	-	-	Elsevier
Current Advances in Immunology and Infectious Diseases	0964-8747	-	Cabs	Elsevier
Current Advances in Neuroscience	0741-1677	-	-	Elsevier
Current Advances in Plant Science	0306-4484	-	Cabs	Elsevier
Current Advances in Protein Biochemistry	0965-0504	-	-	Elsevier
Current Advances in Toxicology	0965-0512	-	-	Elsevier
Current Anaesthesia and Critical Care	0953-7112	-	-	Elsevier
Current Applied Physics	1567-1739	-	Korean Physical Society	Elsevier
Current Diagnostic Pathology	0968-6053	-	-	Elsevier
Current Obstetrics and Gynaecology	0957-5847	-	-	Elsevier
Current Opinion in Behavioral Sciences	2352-1546	-	Special Policy: 12 months	Elsevier
Current Opinion in Biotechnology	0958-1669	-	Current Opinion;Special Policy: 12 months	Elsevier
Current Opinion in Cell Biology	0955-0674	-	Current Opinion;Special Policy: 12 months	Elsevier
Current Opinion in Chemical Biology	1367-5931	-	Current Opinion	Elsevier
Current Opinion in Chemical Engineering	2211-3398	-	-	Elsevier
Current Opinion in Environmental Sustainability	1877-3435	-	Current Opinion	Elsevier
Current Opinion in Food Science	-	2214-7993	Special Policy: 12 months	Elsevier
Current Opinion in Genetics and Development	0959-437X	-	Special Policy: 12 months	Elsevier
Current Opinion in Immunology	0952-7915	-	Current Opinion;Special Policy: 12 months	Elsevier
Current Opinion in Insect Science	-	2214-5745	Special Policy: 12 months	Elsevier
Current Opinion in Microbiology	1369-5274	-	Current Opinion;Special Policy: 12 months	Elsevier
Current Opinion in Neurobiology	0959-4388	-	Current Opinion;Special Policy: 12 months	Elsevier
Current Opinion in Pharmacology	1471-4892	-	Current Opinion;Special Policy: 12 months	Elsevier
Current Opinion in Plant Biology	1369-5266	-	Current Opinion	Elsevier
Current Opinion in Psychology	2352-250X	-	Special Policy: 12 months	Elsevier
Current Opinion in Solid State and Materials Science	1359-0286	-	-	Elsevier
Current Opinion in Structural Biology	0959-440X	-	Current Opinion;Special Policy: 12 months	Elsevier
Current Opinion in Systems Biology	-	2452-3100	Special Policy: 12 months	Elsevier
Current Opinion in Virology	1879-6257	-	Special Policy: 12 months	Elsevier
Current Orthopaedics	0268-0890	-	Medicine Publishing	Elsevier
Current Problems in Cancer	0147-0272	-	Mosby;Special Policy: 12 months	Elsevier
Current Problems in Cardiology	0146-2806	-	Mosby;Special Policy: 12 months	Elsevier
Current Problems in Diagnostic Radiology	0363-0188	-	Mosby;Special Policy: 12 months	Elsevier
Current Problems in Pediatric and Adolescent Health Care	1538-5442	-	Mosby;Special Policy: 12 months	Elsevier
Current Problems in Surgery	3840-11-01	-	Mosby;Special Policy: 12 months	Elsevier
Current Research on Cities	-	-	-	Elsevier
Current Therapeutic Research	0011-393X	-	Excerpta Medica;Special Policy: Creative Commons Attribution Non-Commercial No-Derivatives License	Elsevier
Currents in Pharmacy Teaching and Learning	1877-1297	-	Special Policy: 12 months	Elsevier
CVD Prevention and Control	1875-4570	1875-4562	World Heart Federation;Asian Pacific Society of Cardiology	Elsevier
Cytokine	1043-4666	-	Academic Press;Special Policy: 12 months;International Cytokine Society	Elsevier
Cytokine and Growth Factor Reviews	1359-6101	-	-	Elsevier
Cytotherapy	1465-3249	-	-	Elsevier
Data and Knowledge Engineering	0169-023X	-	North-Holland Publishing;Special Policy: 24 months	Elsevier
Data in Brief	-	2352-3409	Special Policy: Creative Commons Licenses	Elsevier
Decision Support Systems	0167-9236	-	-	Elsevier
Deep Sea Research Part I: Oceanographic Research Papers	0967-0637	-	Pergamon	Elsevier
Deep Sea Research Part II: Topical Studies in Oceanography	0967-0645	-	Pergamon	Elsevier
Dendrochronologia	1125-7865	-	Urban and Fischer	Elsevier
Dental Abstracts	8486-11-01	-	Mosby;Special Policy: 12 months	Elsevier
Dental Cadmos	8524-11-01	-	Special Policy: 12 months	Elsevier
Dental Clinics of North America	8532-11-01	-	Special Policy: 12 months	Elsevier
Dental Materials	0109-5641	-	Academy of Dental Materials;Special Policy: 12 months	Elsevier
Dermatologic Clinics	0733-8635	-	Special Policy: 12 months	Elsevier
Dermatologica Sinica	1027-8117	-	-	Elsevier
Dermatology and Venereology (Section 13 EMBASE)	0014-4177	-	EMBASE	Elsevier
Desalination	9164-11-01	-	-	Elsevier
Design Studies	0142-694X	-	-	Elsevier
Deutsche Zeitschrift fÃ¼r Akupunktur	0415-6412	-	Urban and Fischer	Elsevier
Developmental and Comparative Immunology	0145-305X	-	International Society of Developmental and Comparative Immunology	Elsevier
Developmental Biology	0012-1606	-	Society for Developmental Biology;Academic Press	Elsevier
Developmental Biology and Teratology (Section 21 EMBASE)	0014-4258	-	-	Elsevier
Developmental Cognitive Neuroscience	1878-9293	-	Special Policy: Creative Commons Licenses	Elsevier
Developmental Review	0273-2297	-	Special Policy: 24 months	Elsevier
Diabetes and Metabolic Syndrome: Clinical Research and Reviews	1871-4021	-	DiabetesIndia;Special Policy: 12 months	Elsevier
Diabetes Research and Clinical Practice	0168-8227	-	International Diabetes Federation	Elsevier
Diagnostic and Interventional Imaging	2211-5684	-	CollÃ¨ge des Enseignants en Radiologie de France (CERF);SociÃ©tÃ© FranÃ§aise de Radiologie (SFR);Special Policy: 12 months	Elsevier
Diagnostic Histopathology	1756-2317	-	-	Elsevier
Diagnostic Microbiology and Infectious Disease	0732-8893	-	-	Elsevier
Diamond and Related Materials	0925-9635	-	-	Elsevier
Differential Geometry and its Applications	0926-2245	-	North-Holland Publishing	Elsevier
Differentiation	0301-4681	1432-0436	International Society of Differentiation	Elsevier
Digestive and Liver Disease	1590-8658	-	Italian Association for Hospital Gastroenterologists and Digestive Endoscopists (AIGO);Italian Association for the Study of the Liver (AISF);Italian Association for the Study of the Pancreas (AISP);Italian Society of Gastroenterology (SIGE);Italian Society of Pediatric Gastroenterology and Hepatology (SIGENP);SociÃ©tÃ© Nationale FranÃ§aise de GastroentÃ©rologie (SNFGE);Italian Association for Dig…	Elsevier
Digital Investigation	1742-2876	-	Elsevier Advanced Technology	Elsevier
Digital Signal Processing	1051-2004	-	Academic Press	Elsevier
Disability and Health Journal	1936-6574	-	American Association on Health and Disability	Elsevier
Disaster Management and Response	1540-2487	-	Emergency Nurses Association	Elsevier
Discourse, Context and Media	2211-6958	-	-	Elsevier
Discrete Applied Mathematics	0166-218X	-	North-Holland Publishing	Elsevier
Discrete Mathematics	0012-365X	-	North-Holland Publishing	Elsevier
Discrete Optimization	1572-5286	-	-	Elsevier
Disease-A-Month	5029-11-01	-	Mosby	Elsevier
Displays	0141-9382	-	-	Elsevier
DNA Repair	1568-7864	-	-	Elsevier
DoctorConsult	1879-4122	-	-	Elsevier
Domestic Animal Endocrinology	0739-7240	-	Special Policy: 12 months	Elsevier
Droit, DÃ©ontologie & Soin	1629-6583	-	Special Policy: 12 months	Elsevier
Drug and Alcohol Dependence	0376-8716	-	Special Policy: 12 months;College on Problems of Drug Dependence	Elsevier
Drug Dependence, Alcohol Abuse and Alcoholism (Section 40 EMBASE)	0925-5958	-	EMBASE	Elsevier
Drug Discovery Today	1359-6446	-	Trends;Special Policy: 12 months	Elsevier
Drug Discovery Today: BIOSILICO	1741-8364	1878-0997	-	Elsevier
Drug Discovery Today: Disease Mechanisms	1740-6765	-	Trends	Elsevier
Drug Discovery Today: Disease Models	1740-6757	-	Special Policy: 12 months	Elsevier
Drug Discovery Today: Technologies	1740-6749	-	Trends;Special Policy: 12 months	Elsevier
Drug Discovery Today: Therapeutic Strategies	1740-6773	-	-	Elsevier
Drug Metabolism and Pharmacokinetics	-	1347-4367	Special Policy: 12 months	Elsevier
Drug Resistance Updates	1368-7646	-	-	Elsevier
Dyes and Pigments	0143-7208	-	-	Elsevier
Dynamics of Atmospheres and Oceans	0377-0265	-	Special Policy: 24 months	Elsevier
e-SPEN	1751-4991	-	European Society for Clinical Nutrition and Metabolism (ESPEN)	Elsevier
e-SPEN Journal	2212-8263	-	-	Elsevier
Early Childhood Research Quarterly	0885-2006	-	National Association for the Education of Young People (NAEYC)	Elsevier
Early Human Development	0378-3782	-	Special Policy: 12 months	Elsevier
Earth and Planetary Science Letters	0012-821X	-	-	Elsevier
Earth Science Frontiers	1872-5791	-	China University of Geosciences (Beijing);Peking University	Elsevier
Earth-Science Reviews	8252-12-01	-	-	Elsevier
Eating Behaviors	1471-0153	-	-	Elsevier
EAU Update Series	1570-9124	-	-	Elsevier
EBioMedicine	-	2352-3964	Special Policy: Creative Commons	Elsevier
Ecohydrology and Hydrobiology	1642-3593	-	Special Policy: 12 months	Elsevier
Ecological Abstracts	0305-196X	-	-	Elsevier
Ecological Complexity	1476-945X	-	-	Elsevier
Ecological Economics	0921-8009	-	International Society for Ecological Economics (ISEE)	Elsevier
Ecological Engineering	0925-8574	-	-	Elsevier
Ecological Indicators	1470-160X	-	-	Elsevier
Ecological Informatics	1574-9541	-	-	Elsevier
Ecological Modelling	0304-3800	-	-	Elsevier
EconomiA	1517-7580	-	Special Policy: 12 months	Elsevier
Economic Modelling	0264-9993	-	-	Elsevier
Economic Systems	0939-3625	-	Osteuropa Institut Regensburg	Elsevier
Economics and Human Biology	1570-677X	-	-	Elsevier
Economics Letters	0165-1765	-	-	Elsevier
Economics of Education Review	0272-7757	-	-	Elsevier
Economics of Transportation	-	-	-	Elsevier
Ecosystem Services	2212-0416	-	-	Elsevier
Ecotoxicology and Environmental Safety	0147-6513	-	Academic Press	Elsevier
Edge - Biointerphase Science	1871-1081	-	-	Elsevier
Education for Chemical Engineers	1749-7728	-	European Federation of Chemical Engineering: Part D;Institution of Chemical Engineers	Elsevier
Educational Research Review	1747-938X	-	-	Elsevier
European Economic Review	0014-2921	-	Special Policy: 24 months	Elsevier
Egyptian Informatics Journal	1110-8665	-	Cairo University, Faculty of Computers and Information	Elsevier
Egyptian Journal of Anaesthesia	1110-1849	-	Egyptian Society of Anesthesiologists;Special Policy: Creative Commons Attribution Non-Commercial No-Derivatives License	Elsevier
Egyptian Journal of Ear, Nose, Throat and Allied Sciences	2090-0740	-	Egyptian Society of Ear Nose Throat and Allied Sciences;Eyptian Society of Ear, Nose, Throat, and Allied Sciences (ESENTAS)	Elsevier
Egyptian Journal of Forensic Sciences	2090-536X	-	Egyptian Forensic Medicine Authority;SpringerOpen (part of Springer Nature)	Elsevier
Egyptian Journal of Petroleum	1110-0621	-	Egyptian Petroleum Research Institute	Elsevier
Egyptian Journal of Remote Sensing and Space Sciences	1110-9823	-	National Authority Remote Sensing and Space Sciences;Special Policy: Creative Commons Attribution Non-Commercial No-Derivatives License	Elsevier
Egyptian Rheumatologist	1110-1164	-	Egyptian Society for Joint Diseases and Arthritis	Elsevier
EJC Supplements	1359-6349	-	-	Elsevier
European Journal of Operational Research	0377-2217	-	Special Policy: 24 months	Elsevier
European Journal of Radiology	0720-048X	-	Special Policy: 12 months	Elsevier
EJSO - European Journal of Surgical Oncology	0748-7983	-	European Society of Surgical Oncology;BASO - the Association for Cancer Surgery;Special Policy: 12 months	Elsevier
Electoral Studies	0261-3794	-	-	Elsevier
Electric Power Systems Research	0378-7796	-	-	Elsevier
Electricity Journal	1040-6190	-	-	Elsevier
Electrochemistry Communications	1388-2481	-	International Society of Electrochemistry (ISE)	Elsevier
Electrochimica Acta	0013-4686	-	International Society of Electrochemistry (ISE);Pergamon	Elsevier
Electroencephalography and clinical neurophysiology	0013-4694	-	-	Elsevier
Electronic Commerce Research and Applications	1567-4223	-	-	Elsevier
Electronic Notes in Discrete Mathematics	1571-0653	-	-	Elsevier
Electronic Notes in Theoretical Computer Science	1571-0661	-	-	Elsevier
Elsevier Medical Case Reports	2211-2677	-	-	Elsevier
EMC - AKOS - Trattato di Medicina	1634-7358	-	-	Elsevier
EMC - Anestesia-ReanimaciÃ³n	1280-4703	-	-	Elsevier
EMC - Anestesia-Rianimazione	1283-0771	-	-	Elsevier
EMC - Aparato locomotor	1286-935X	-	-	Elsevier
EMC - CirugÃ­a general	1634-7080	-	-	Elsevier
EMC - CirugÃ­a otorrinolaringolÃ³gica y cervicofacial	1635-2505	-	-	Elsevier
EMC - CirugÃ­a plÃ¡stica reparadora y estÃ©tica	1634-2143	-	-	Elsevier
EMC - Cosmetologia Medica e Medicina degli Inestetismi Cutanei	1776-0313	-	-	Elsevier
EMC - DermatologÃ­a	1761-2896	-	-	Elsevier
EMC - GinecologÃ­a-Obstetricia	1283-081X	-	-	Elsevier
EMC - Kinesiterapia - Medicina fÃ­sica	1293-2965	-	-	Elsevier
EMC - Medicina riabilitativa	1283-078X	-	-	Elsevier
EMC - Neurologia	1634-7072	-	-	Elsevier
EMC - Otorinolaringoiatria	1639-870X	-	-	Elsevier
EMC - OtorrinolaringologÃ­a	1632-3475	-	-	Elsevier
EMC - PediatrÃ­a	1245-1789	-	-	Elsevier
EMC - PodologÃ­a	1762-827X	-	-	Elsevier
EMC - TÃ©cnicas quirÃºrgicas - Aparato digestivo	1282-9129	-	-	Elsevier
EMC - TÃ©cnicas quirÃºrgicas - Ortopedia y traumatologÃ­a	2211-033X	-	-	Elsevier
EMC - Tecniche chirurgiche - Chirurgia Addominale	1283-0798	-	-	Elsevier
EMC - Tecniche chirurgiche - Chirurgia Generale	1636-5577	-	-	Elsevier
EMC - Tecniche chirurgiche - Chirurgia ORL e cervico-facciale	1292-3036	-	-	Elsevier
EMC - Tecniche Chirurgiche - Chirurgia Ortopedica	2211-0801	-	-	Elsevier
EMC - Tecniche chirurgiche - Chirurgia Plastica, Ricostruttiva ed Estetica	1769-6704	-	-	Elsevier
EMC - Tecniche chirurgiche - Chirurgia Torace	1288-3336	-	-	Elsevier
EMC - Tecniche chirurgiche - Chirurgia Vascolare	1283-0801	-	-	Elsevier
EMC - Tratado de medicina	1636-5410	-	-	Elsevier
EMC - Urgenze	1286-9341	-	-	Elsevier
EMC - UrologÃ­a	1761-3310	-	-	Elsevier
Emergency Medicine Clinics of North America	0733-8627	-	Special Policy: 12 months	Elsevier
Emerging Markets Review	1566-0141	-	-	Elsevier
Emotion, Space and Society	1755-4586	-	Society for Study of Emotion, Affect and Space	Elsevier
Endeavour	0160-9327	-	Special Policy: 24 months	Elsevier
EndocrinologÃ­a y NutriciÃ³n	1575-0922	1579-2021	Sociedad EspaÃ±ola de EndocrinologÃ­a y NutriciÃ³n;Special Policy: 12 months	Elsevier
EndocrinologÃ­a y NutriciÃ³n (English Edition)	2173-5093	-	Spanish Society of Endocrinology and Nutrition;Special Policy: 12 months	Elsevier
Endocrinology (Section 3 EMBASE)	0014-407X	-	EMBASE	Elsevier
Endocrinology and Metabolism Clinics of North America	0889-8529	-	Special Policy: 12 months	Elsevier
Energy	0360-5442	-	-	Elsevier
Energy and Buildings	0378-7788	-	-	Elsevier
Energy Conversion and Management	0196-8904	-	-	Elsevier
Energy Economics	0140-9883	-	-	Elsevier
Energy for Sustainable Development	0973-0826	-	International Energy Initiative	Elsevier
Energy Policy	0301-4215	-	-	Elsevier
Energy Procedia	1876-6102	-	Special Policy: Creative Commons Attribution Non-Commercial No-Derivatives License	Elsevier
Energy Research and Social Science	-	2214-6296	-	Elsevier
Energy Strategy Reviews	2211-467X	-	-	Elsevier
EnfermerÃ­a ClÃ­nica	1130-8621	1579-2013	Special Policy: 12 months	Elsevier
EnfermerÃ­a Intensiva	1130-2399	1578-1291	Sociedad EspaÃ±olad e EnfermerÃ­a Intensiva y Unidades Coronarias;Special Policy: 12 months	Elsevier
Engineering	2095-8099	2096-0026	Special Policy: Creative Commons Licenses	Elsevier
Engineering Analysis with Boundary Elements	0955-7997	-	-	Elsevier
Engineering Applications of Artificial Intelligence	0952-1976	-	Pergamon;International Federation of Automatic Control (IFAC)	Elsevier
Engineering Failure Analysis	1350-6307	-	European Structural Integrity Society	Elsevier
Engineering Fracture Mechanics	0013-7944	-	European Structural Integrity Society	Elsevier
Engineering Geology	0013-7952	-	-	Elsevier
Engineering Index Annual	0360-8557	-	-	Elsevier
Engineering Index Monthly	0742-1974	-	-	Elsevier
Engineering Structures	0141-0296	-	-	Elsevier
English for Specific Purposes	0889-4906	-	Special Policy: 24 months	Elsevier
Entertainment Computing	1875-9521	-	-	Elsevier
Environment International	0160-4120	-	Pergamon;Special Policy: Creative Commons Licenses	Elsevier
Environmental and Experimental Botany	0098-8472	-	-	Elsevier
Environmental Development	2211-4599	-	-	Elsevier
Environmental Health and Pollution Control (Section 46 EMBASE)	0300-5194	-	-	Elsevier
Environmental Impact Assessment Review	0195-9255	-	-	Elsevier
Environmental Innovation and Societal Transitions	2210-4224	-	-	Elsevier
Environmental Modelling and Software	1364-8152	-	-	Elsevier
Environmental Pollution	0269-7491	1873-6424	-	Elsevier
Environmental Research	0013-9351	-	Academic Press	Elsevier
Environmental Science and Policy	1462-9011	-	-	Elsevier
Environmental Technology and Innovation	2352-1864	-	-	Elsevier
Environmental Toxicology and Pharmacology	1382-6689	-	Special Policy: 12 months	Elsevier
Enzyme and Microbial Technology	0141-0229	-	Special Policy: 12 months	Elsevier
Epidemics	1755-4365	-	Special Policy: Creative Commons Licenses	Elsevier
Epidemiology and Public Health / Revue d'Ã‰pidÃ©miologie et de SantÃ© Publique	0398-7620	-	Special Policy: 12 months	Elsevier
Epilepsy Abstracts (Section 50 EMBASE)	0031-0743	-	EMBASE	Elsevier
Epilepsy and Behavior	1525-5050	-	-	Elsevier
Epilepsy and Behavior Case Reports	2213-3232	2213-3232	Special Policy: Creative Commons	Elsevier
Epilepsy Research	0920-1211	-	-	Elsevier
Estuarine, Coastal and Shelf Science	0272-7714	-	-	Elsevier
EuPA Open Proteomics	-	2212-9685	Special Policy: Creative Commons	Elsevier
European Annals of Otorhinolaryngology, Head and Neck Diseases	1879-7296	-	Special Policy: 12 months	Elsevier
European Journal of Agronomy	1161-0301	-	European Society for Agronomy	Elsevier
European Journal of Cancer	0959-8049	-	European Organisation for Research and Treatment of Cancer (EORTC);European CanCer Organisation (ECCO);European Association for Cancer Research (EACR);European Society of Breast Cancer Specialists (EUSOMA);European School of Oncology (ESO);Special Policy: 12 months	Elsevier
European Journal of Cardio-Thoracic Surgery	1010-7940	-	European Association for Cardio-Thoracic Surgery;European Society of Thoracic Surgeons	Elsevier
European Journal of Cardio-Thoracic Surgery Supplement	1567-4258	-	-	Elsevier
European Journal of Cardiovascular Nursing	1474-5151	-	Council on Cardiovascular Nursing and Allied Professions;SAGE Publications (UK and US)	Elsevier
European Journal of Cell Biology	0171-9335	-	Urban and Fischer;Special Policy: 12 months	Elsevier
European Journal of Combinatorics	0195-6698	-	Academic Press	Elsevier
European Journal of Control	0947-3580	-	European Union Control Association	Elsevier
European Journal of Integrative Medicine	1876-3820	-	Urban and Fischer;Special Policy: 12 months	Elsevier
European Journal of Internal Medicine	0953-6205	-	European Federation of Internal Medicine (EFIM);Icelandic Society of Internal Medicine;Irish Association of Internal Medicine (IAIM);Norwegian Society for Internal Medicine;Swedish Society of Internal Medicine;Special Policy: 12 months;Polish Society of Internal Medicine;Portuguese Society of Internal Medicine;Turkish Society of Internal Medicine	Elsevier
European Journal of Mechanics - A/Solids	0997-7538	-	European Mechanics Society (Euromech)	Elsevier
European Journal of Mechanics - B/Fluids	0997-7546	-	European Mechanics Society (Euromech)	Elsevier
European Journal of Medical Genetics	1769-7212	-	Special Policy: 12 months	Elsevier
European Journal of Medicinal Chemistry	0223-5234	-	French SociÃ©tÃ© de Chimie ThÃ©rapeutique (SCT)	Elsevier
European Journal of Obstetrics and Gynecology and Reproductive Biology	0301-2115	-	Special Policy: 12 months	Elsevier
European Journal of Oncology Nursing	1462-3889	-	Churchill Livingstone;Special Policy: 12 months	Elsevier
European Journal of Paediatric Neurology	1090-3798	-	European Paediatric Neurology Society;Special Policy: 12 months	Elsevier
European Journal of Pain	1090-3801	1532-2149	European Federation of the International Association for the Study of Pain chapters (EFIC) Â®;Special Policy: 12 months	Elsevier
European Journal of Pain Supplements	1754-3207	1878-0075	European Federation of International Association for the Study of Pain Chapters;Special Policy: No OnlineOpen	Elsevier
European Journal of Pharmaceutical Sciences	0928-0987	-	European Federation for Pharmaceutical Sciences (EUFEPS);Special Policy: 12 months	Elsevier
European Journal of Pharmaceutics and Biopharmaceutics	0939-6411	-	International Association for Pharmaceutical Technology;Special Policy: 12 months	Elsevier
European Journal of Pharmacology	0014-2999	-	Special Policy: 12 months	Elsevier
European Journal of Political Economy	0176-2680	-	Special Policy: 24 months	Elsevier
European Journal of Protistology	0932-4739	-	Urban and Fischer;Special Policy: 12 months	Elsevier
European Journal of Radiography	1756-1175	-	Euro-Med Congress for Radiographers	Elsevier
European Journal of Radiology Extra	1571-4675	-	-	Elsevier
European Journal of Soil Biology	1164-5563	-	-	Elsevier
European Journal of Trauma and Dissociation	-	2468-7499	-	Elsevier
European Journal of Vascular and Endovascular Surgery	1078-5884	-	European Society for Vascular Surgery;Special Policy: 12 months	Elsevier
European Journal of Vascular and Endovascular Surgery Extra	1533-3167	-	European Society for Vascular Surgery	Elsevier
European Management Journal	0263-2373	-	Special Policy: 24 months	Elsevier
European Neuropsychopharmacology	0924-977X	-	European College of Neuropsychopharmacology;Special Policy: 12 months	Elsevier
European Polymer Journal	0014-3057	-	-	Elsevier
European Review of Applied Psychology / Revue EuropÃ©enne de Psychologie AppliquÃ©e	1162-9088	-	-	Elsevier
European Urology	0302-2838	-	European Association of Urology;Special Policy: 12 months	Elsevier
European Urology Supplements	1569-9056	-	Special Policy: 12 months	Elsevier
Evaluation and Program Planning	0149-7189	-	Special Policy: 24 months	Elsevier
Evidence-based Cardiovascular Medicine	1361-2611	-	-	Elsevier
Evidence-based Obstetrics and Gynecology	1361-259X	-	Churchill Livingstone	Elsevier
Evolution and Human Behavior	1090-5138	-	Human Behavior and Evolution Society	Elsevier
Ã‰volution Psychiatrique	0014-3855	-	-	Elsevier
Excerpta Medica Full Set Series	0921-822X	-	EMBASE	Elsevier
Experimental and Molecular Pathology	0014-4800	-	Academic Press;Special Policy: 12 months	Elsevier
Experimental and Toxicologic Pathology	0940-2993	-	Urban and Fischer;Special Policy: 12 months	Elsevier
Experimental Cell Research	0014-4827	-	Academic Press;Special Policy: 12 months	Elsevier
Experimental Eye Research	0014-4835	-	International Society for Eye Research;Academic Press;Special Policy: 12 months	Elsevier
Experimental Gerontology	0531-5565	-	Special Policy: 12 months	Elsevier
Experimental Hematology	0301-472X	-	International Society for Experimental Hematology;Special Policy: 12 months	Elsevier
Experimental Neurology	0014-4886	-	Academic Press;Special Policy: 12 months	Elsevier
Experimental Parasitology	0014-4894	-	Academic Press;Special Policy: 12 months	Elsevier
Experimental Thermal and Fluid Science	0894-1777	-	-	Elsevier
Expert Systems with Applications	0957-4174	-	Pergamon	Elsevier
Explorations in Economic History	0014-4983	-	-	Elsevier
Explore: The Journal of Science and Healing	1550-8307	-	-	Elsevier
Expositiones Mathematicae	0723-0869	-	Urban and Fischer	Elsevier
Extreme Mechanics Letters	-	2352-4316	-	Elsevier
Facial Plastic Surgery Clinics of North America	1064-7406	-	Special Policy: 12 months	Elsevier
FEBS Letters	0014-5793	1873-3468	Special Policy: 12 months;Federation of European Biochemical Societies	Elsevier
FEBS Open Bio	-	2211-5463	Federation of European Biochemical Societies;Wiley Open Access;Special Policy: FEBS Open Bio	Elsevier
Fertility and Sterility	0015-0282	-	American Society for Reproductive Medicine	Elsevier
Field Crops Research	0378-4290	-	-	Elsevier
Field Mycology	1468-1641	-	British Mycological Society	Elsevier
Filtration and Separation	0015-1882	-	-	Elsevier
Filtration Industry Analyst	1365-6937	-	-	Elsevier
Finance Research Letters	1544-6123	-	-	Elsevier
Finite Elements in Analysis and Design	0168-874X	-	-	Elsevier
Finite Fields and Their Applications	1071-5797	-	Academic Press	Elsevier
Fire Safety Journal	0379-7112	-	International Association for Fire Safety Science	Elsevier
Fish and Shellfish Immunology	1050-4648	-	Academic Press	Elsevier
Fisheries Research	0165-7836	-	-	Elsevier
Fitoterapia	0367-326X	-	-	Elsevier
Flora	0367-2530	-	Urban and Fischer	Elsevier
Flow Measurement and Instrumentation	0955-5986	-	-	Elsevier
Fluid Abstracts: Civil Engineering	0962-7170	-	-	Elsevier
Fluid Abstracts: Process Engineering	0962-7162	-	-	Elsevier
Fluid Phase Equilibria	0378-3812	-	-	Elsevier
Focus on Catalysts	1351-4180	-	Engineering Information (Ei)	Elsevier
Food and Bioproducts Processing	0960-3085	-	European Federation of Chemical Engineering: Part C;Institution of Chemical Engineers	Elsevier
Food and Chemical Toxicology	0278-6915	-	Pergamon;Special Policy: 12 months	Elsevier
Food Chemistry	0308-8146	-	Special Policy: 12 months	Elsevier
Food Control	0956-7135	-	European Federation of Food Science and Technology (EFFoST);Special Policy: 12 months	Elsevier
Food Hydrocolloids	0268-005X	-	Special Policy: 12 months	Elsevier
Food Microbiology	0740-0020	-	Special Policy: 12 months	Elsevier
Food Policy	0306-9192	-	-	Elsevier
Food Quality and Preference	0950-3293	-	Sensometric Society;Special Policy: 12 months	Elsevier
Food Research International	0963-9969	-	Canadian Institute of Food Science and Technology (CIFST);Special Policy: 12 months	Elsevier
Food Science and Human Wellness	2213-4530	-	Beijing Academy of Food Sciences	Elsevier
Food Structure	2213-3291	-	Special Policy: 12 months	Elsevier
Food Webs	-	2352-2496	Special Policy: 12 months	Elsevier
Foot	0958-2592	-	Special Policy: 12 months	Elsevier
Foot and Ankle Clinics	1083-7515	-	Special Policy: 12 months	Elsevier
Foot and Ankle Surgery	1268-7731	1460-9584	European Foot and Ankle Society;Special Policy: 12 months	Elsevier
Fooyin Journal of Health Sciences	1877-8607	-	Fooyin University Hospital	Elsevier
Forensic Science Abstracts (Section 49 EMBASE)	0303-8459	-	EMBASE	Elsevier
Forensic Science International	0379-0738	-	Special Policy: 12 months	Elsevier
Forensic Science International: Genetics	1872-4973	-	International Society for Forensic Genetics(ISFG);Special Policy: 12 months	Elsevier
Forensic Science International: Genetics Supplement Series	1875-1768	-	Special Policy: 12 months;International Society for Forensic Genetics(ISFG)	Elsevier
Forensic Science International Supplement Series	1875-1741	-	Special Policy: 12 months	Elsevier
Forest Ecology and Management	0378-1127	-	-	Elsevier
Forest Policy and Economics	1389-9341	-	European Forest Institute	Elsevier
Formosan Journal of Musculoskeletal Disorders	2210-7940	-	Taiwan Orthopaedic Association	Elsevier
Formosan Journal of Surgery	1682-606X	-	Taiwan Surgical Association;Medknow Publications	Elsevier
Foundation Years	1744-1889	-	Medicine Publishing	Elsevier
Free Radical Biology and Medicine	0891-5849	-	-	Elsevier
Frontiers in Neuroendocrinology	0091-3022	-	Academic Press	Elsevier
Frontiers of Architectural Research	2095-2635	-	Special Policy: Creative Commons Attribution Non-Commercial No-Derivatives License;KeAi Communications;Higher Education Press	Elsevier
Fuel	0016-2361	-	-	Elsevier
Fuel and Energy Abstracts	0140-6701	-	Energy Institute	Elsevier
Fuel Cells Bulletin	1464-2859	-	-	Elsevier
Fuel Processing Technology	0378-3820	-	-	Elsevier
Fungal Biology	1878-6146	-	British Mycological Society	Elsevier
Fungal Biology Reviews	1749-4613	-	British Mycological Society	Elsevier
Fungal Ecology	1754-5048	-	-	Elsevier
Fungal Genetics and Biology	1087-1845	-	Academic Press	Elsevier
Fusion Engineering and Design	0920-3796	-	-	Elsevier
FuÃŸ and Sprunggelenk	1619-9987	1619-9995	Deutschen Assoziation fur FuÃŸ & Sprunggelenk;Urban and Fischer	Elsevier
Future Generation Computer Systems	0167-739X	-	North-Holland Publishing	Elsevier
Futures	0016-3287	-	Special Policy: 24 months	Elsevier
Fuzzy Sets and Systems	0165-0114	-	North-Holland Publishing;Special Policy: 24 months;International Fuzzy Systems Association (IFSA)	Elsevier
Gait and Posture	0966-6362	1879-2219	International Society for Posture and Gait Research (ISPGR);SocietÃ Italiana di Analisi del Movimento in Clinica (SIAMOC);European Society of Movement Analysis in Adults and Children (ESMAC);Gait and Clinical Movement Analysis Society (GCMAS);Special Policy: 12 months	Elsevier
Games and Economic Behavior	0899-8256	-	-	Elsevier
Gastroenterology	0016-5085	-	Special Policy: 12 months;AGA Institute;WB Saunders	Elsevier
Gastroenterology (Section 48 EMBASE)	0031-3580	-	EMBASE	Elsevier
Gastroenterology Clinics of North America	0889-8553	-	Special Policy: 12 months	Elsevier
Gastrointestinal Endoscopy	0016-5107	-	American Society for Gastrointestinal Endoscopy	Elsevier
Gastrointestinal Endoscopy Clinics of North America	1052-5157	-	Special Policy: 12 months	Elsevier
Gender Medicine	1550-8579	-	-	Elsevier
Gene	0378-1119	-	Special Policy: 12 months	Elsevier
Gene Expression Patterns	1567-133X	-	International Society of Developmental Biologists;Special Policy: 12 months	Elsevier
General and Comparative Endocrinology	0016-6480	-	Academic Press;Special Policy: 12 months	Elsevier
General Hospital Psychiatry	0163-8343	-	Special Policy: 12 months	Elsevier
General Pathology and Pathological Anatomy (Section 5 EMBASE)	0014-4096	-	EMBASE	Elsevier
Genomic Medicine, Biomarkers and Health Sciences	2211-4254	-	Taiwan Genomic Medicine and Biomarker Society	Elsevier
Genomics	0888-7543	-	Academic Press;Special Policy: 12 months	Elsevier
Genomics Data	2213-5960	2213-5960	Special Policy: Creative Commons	Elsevier
Genomics, Proteomics and Bioinformatics	1672-0229	-	-	Elsevier
Geobios	0016-6995	-	Special Policy: 12 months	Elsevier
Geochimica et Cosmochimica Acta	0016-7037	-	Meteoritical Society;Geochemical Society	Elsevier
Geoderma	0016-7061	-	-	Elsevier
Geodesy and Geodynamics	-	1674-9847	Special Policy: Creative Commons Attribution Non-Commercial No-Derivatives License;Ke Ai Publishing	Elsevier
Geoforum	0016-7185	-	Special Policy: 24 months	Elsevier
Geographical Abstracts: Human Geography	0953-9611	-	-	Elsevier
Geographical Abstracts: Physical Geography	0954-0504	-	-	Elsevier
Geography and Natural Resources	1875-3728	-	Russian Academy of Sciences, Siberian Branch	Elsevier
Geological Abstracts	0954-0512	-	-	Elsevier
Geomechanics Abstracts	1365-1617	-	-	Elsevier
Geomorphology	0169-555X	-	International Geosynthetics Society (IGS)	Elsevier
Geoscience Frontiers	1674-9871	-	China University of Geosciences (Beijing)	Elsevier
Geotextiles and Geomembranes	0266-1144	-	International Geosynthetics Society (IGS)	Elsevier
Geothermics	0375-6505	-	Special Policy: 24 months	Elsevier
Geriatric Nursing	0197-4572	-	Mosby	Elsevier
Gerontology and Geriatrics (Section 20 EMBASE)	0014-424X	-	EMBASE	Elsevier
Giornale Italiano di Endodonzia	1121-4171	1121-4171	SocietÃ Italiana di Endodonzia (SIE)	Elsevier
Global and Planetary Change	0921-8181	1872-6364	-	Elsevier
Global Environmental Change	0959-3780	-	-	Elsevier
Global Finance Journal	1044-0283	-	-	Elsevier
Global Food Security	2211-9124	-	-	Elsevier
Gondwana Research	1342-937X	-	International Association for Gondwana Research	Elsevier
Government Information Quarterly	0740-624X	-	-	Elsevier
Graphical Models	1524-0703	-	Academic Press	Elsevier
Growth Hormone and IGF Research	1096-6374	-	-	Elsevier
Gynecologic Oncology	0090-8258	-	Society of Gynecologic Oncologists;Academic Press;Special Policy: 12 months	Elsevier
Gynecologic Oncology Case Reports	2211-338X	2211-338X	Special Policy: Creative Commons	Elsevier
GynÃ©cologie ObstÃ©trique and FertilitÃ©	1297-9589	-	-	Elsevier
Habitat International	0197-3975	-	Special Policy: 24 months	Elsevier
Hand Clinics	0749-0712	-	Special Policy: 12 months	Elsevier
Handbook of Clinical Neurology	0072-9752	-	Special Policy: Monograph Series	Elsevier
Harmful Algae	1568-9883	-	-	Elsevier
HAYATI Journal of Biosciences	-	2086-4094	-	Elsevier
Health and Place	1353-8292	-	-	Elsevier
Health Outcomes Research in Medicine	1877-1319	-	-	Elsevier
Health Policy	0168-8510	-	-	Elsevier
Health Policy and Education	0165-2281	-	-	Elsevier
Health Policy and Technology	2211-8837	-	Fellowship of Postgraduate Medicine(FPM)	Elsevier
Health Policy, Economics and Management (Section 36 EMBASE)	0921-8068	-	-	Elsevier
Healthcare Management Forum	0840-4704	-	Canadian College of Health Service Executives	Elsevier
Healthcare: The Journal of Delivery Science and Innovation	2213-0764	-	-	Elsevier
Hearing Research	0378-5955	-	Special Policy: 12 months	Elsevier
Heart & Lung: The Journal of Acute and Critical Care	0147-9563	-	Mosby;Special Policy: 12 months	Elsevier
Heart Failure Clinics	1551-7136	-	Special Policy: 12 months	Elsevier
Heart, Lung and Circulation	1443-9506	1444-2892	Cardiac Society of Australia and New Zealand;Australasian Society of Cardiac and Thoracic Surgeons	Elsevier
Heart Rhythm	1547-5271	-	Cardiac Electrophysiology Society;Heart Rhythm Society;Special Policy: 12 months	Elsevier
HeartRhythm Case Reports	-	2214-0271	Special Policy: Creative Commons Attribution Non-Commercial No-Derivatives License	Elsevier
Heliyon	-	2405-8440	Special Policy: Creative Commons Licenses	Elsevier
Hematology (Section 25 EMBASE)	0014-4290	-	EMBASE	Elsevier
Hematology/Oncology Clinics of North America	0889-8588	-	Special Policy: 12 months	Elsevier
Hepatobiliary and Pancreatic Diseases International	1499-3872	-	-	Elsevier
Hepatology Research	1386-6346	1872-034X	Japan Society of Hepatology	Elsevier
Heterocycles	0385-5414	-	Japan Institute of Heterocyclic Chemistry	Elsevier
High Energy Density Physics	1574-1818	-	-	Elsevier
Historia Mathematica	0315-0860	-	Science of the International Union of the History and Philosophy of Science, Division of the History, International Commission on the History of Mathematics;Academic Press	Elsevier
History of European Ideas	0191-6599	-	-	Elsevier
History of the Family	1081-602X	-	-	Elsevier
HIV and AIDS Review	1730-1270	-	Polish AIDS Research Society;Elsevier Urban and Partner;Special Policy: 12 months	Elsevier
Homeopathy	1475-4916	-	Special Policy: 12 months	Elsevier
HOMO	0018-442X	-	Urban and Fischer	Elsevier
Hong Kong Journal of Nephrology	1561-5413	-	Hong Kong Society of Nephrology	Elsevier
Hong Kong Journal of Occupational Therapy	1569-1861	1876-4398	Hong Kong Occupational Therapy Association (HKOTA);SAGE Publications (UK and US)	Elsevier
Hong Kong Physiotherapy Journal	1013-7025	-	Hong Kong Physiotherapy Association	Elsevier
Hormones and Behavior	0018-506X	-	Academic Press;Special Policy: 12 months	Elsevier
Hospital Medicine Clinics	2211-5943	-	Special Policy: 12 months	Elsevier
HPB	1365-182X	1477-2574	International Hepato-Pancreato-Biliary Association (IHPBA);American Hepato-Pancreato-Biliary Association (AHPBA);European Hepato-Pancreato-Biliary Association (EHPBA);Special Policy: 12 months	Elsevier
Human Genetics (Section 22 EMBASE)	0014-4266	-	EMBASE	Elsevier
Human Immunology	0198-8859	-	American Society for Histocompatibility and Immunogenetics;Special Policy: 12 months	Elsevier
Human Movement Science	0167-9457	-	-	Elsevier
Human Pathology	0046-8177	-	Special Policy: 12 months	Elsevier
Human Resource Management Review	1053-4822	-	-	Elsevier
Hydrometallurgy	0304-386X	-	-	Elsevier
IATSS Research	0386-1112	-	International Association of Traffic and Safety Sciences	Elsevier
IBS, Immuno-analyse and Biologie SpÃ©cialisÃ©e	0923-2532	-	-	Elsevier
Icarus	0019-1035	-	Academic Press	Elsevier
ICES Journal of Marine Science	1054-3139	1095-9289	-	Elsevier
IERI Procedia	-	2212-6678	Information Engineering Research Institute	Elsevier
IFAC papers online	1474-6670	-	Special Policy: IFAC-PapersOnLine;Special Policy: Creative Commons	Elsevier
III-Vs Review	0961-1290	-	-	Elsevier
IIMB Management Review	0970-3896	-	Indian Institute of Management Bangalore	Elsevier
International Journal of Critical Infrastructure Protection	1874-5482	-	-	Elsevier
International Journal of Diabetes Mellitus	1877-5934	-	-	Elsevier
International Journal of Infectious Diseases	1201-9712	-	International Society for Infectious Diseases;Special Policy: Creative Commons Attribution Non-Commercial No-Derivatives License	Elsevier
International Journal of Information Management	0268-4012	-	-	Elsevier
Indian Journal of Rheumatology	0973-3698	-	Indian Rheumatology Association	Elsevier
International Journal of Radiation Oncology - Biology - Physics	0360-3016	-	American Society for Radiation Oncology (ASTRO)	Elsevier
Image and Vision Computing	0262-8856	-	-	Elsevier
Imagerie de la Femme	1776-9817	-	Special Policy: 12 months	Elsevier
Immunobiology	0171-2985	-	Urban and Fischer	Elsevier
Immunology and Allergy Clinics of North America	0889-8561	-	Special Policy: 12 months	Elsevier
Immunology Letters	0165-2478	-	European Federation of Immunological Societies (EFIS)	Elsevier
Immunology, Serology and Transplantation	0014-4304	-	EMBASE	Elsevier
Implantodontie	1158-1336	-	-	Elsevier
Indagationes Mathematicae	0019-3577	-	Royal Netherlands Academy of Arts and Sciences (KNAW)	Elsevier
Indian Heart Journal	0019-4832	-	Cardiological Society of India	Elsevier
Indian Journal of Dentistry	0975-962X	-	-	Elsevier
Indian Journal of Neurotrauma	0973-0508	-	Neurotrauma Society of India	Elsevier
Indian Journal of Transplantation	2212-0017	-	Indian Society of Organ Transplantation	Elsevier
Industrial Crops and Products	0926-6690	-	-	Elsevier
Industrial Marketing Management	0019-8501	-	-	Elsevier
Infant Behavior and Development	0163-6383	-	-	Elsevier
Infection, Genetics and Evolution	1567-1348	-	-	Elsevier
Infectious Disease Clinics of North America	0891-5520	-	Special Policy: 12 months	Elsevier
Information and Computation	0890-5401	-	Academic Press	Elsevier
Information and Management	0378-7206	-	-	Elsevier
Information and Organization	1471-7727	-	Special Policy: 24 months	Elsevier
Information and Software Technology	0950-5849	-	-	Elsevier
Information Economics and Policy	0167-6245	-	Special Policy: 24 months	Elsevier
Information Fusion	1566-2535	-	-	Elsevier
Information Processing and Management	0306-4573	-	-	Elsevier
Information Processing Letters	0020-0190	-	-	Elsevier
Information Sciences	0020-0255	-	-	Elsevier
Information Security Technical Report	1363-4127	-	Elsevier Advanced Technology	Elsevier
Information Systems	0306-4379	-	Pergamon	Elsevier
Infosecurity	1754-4548	-	-	Elsevier
Infrared Physics and Technology	1350-4495	-	-	Elsevier
Injury	0020-1383	-	Saudi Orthopaedic Association in Trauma;Australasian Trauma Society;British Trauma Society;Special Policy: 12 months;Spanish Society of Orthopaedic Surgery and Traumatology (SECOT);Gerhard Kuentscher Society;Societa' Italiana Di Ortopedia e Traumatologia;Hellenic Association of Orthopaedic Surgery and Traumatology	Elsevier
Injury Extra	1572-3461	-	-	Elsevier
Innovative Food Science and Emerging Technologies	1466-8564	-	European Federation of Food Science and Technology (EFFoST);Special Policy: 12 months	Elsevier
Inorganic Chemistry Communications	1387-7003	-	-	Elsevier
Inorganica Chimica Acta	0020-1693	-	-	Elsevier
Insect Biochemistry and Molecular Biology	0965-1748	-	Pergamon;Special Policy: 12 months	Elsevier
Insulin	1557-0843	-	Excerpta Medica	Elsevier
Insurance: Mathematics and Economics	0167-6687	-	-	Elsevier
Integration	0167-9260	-	-	Elsevier
Intelligence	0160-2896	-	Special Policy: 24 months	Elsevier
Intensive and Critical Care Nursing	0964-3397	-	Royal College of Nursing, Critical Care Nursing Forum;Churchill Livingstone;Special Policy: 12 months	Elsevier
Interacting with Computers	0953-5438	-	British Computer Society	Elsevier
Intermetallics	0966-9795	-	-	Elsevier
Internal Medicine (Section 6 EMBASE)	0014-410X	-	-	Elsevier
Internal Medicine News	1097-8690	-	-	Elsevier
International Biodeterioration and Biodegradation	0964-8305	-	International Biodeterioration and Biodegradation Society	Elsevier
International Business Review	0969-5931	-	European International Business Academy (EIBA)	Elsevier
International Communications in Heat and Mass Transfer	0735-1933	-	-	Elsevier
International Congress Series	0531-5131	-	-	Elsevier
International Dairy Journal	0958-6946	-	Special Policy: 12 months	Elsevier
International Development Abstracts	0262-0855	-	-	Elsevier
International Emergency Nursing	1755-599X	1878-013X	European Society of Emergency Nurses (EuSEN);Faculty of Emergency Nursing (UK) (FEN);National Emergency Nurses Association (NENA)	Elsevier
International Health	1876-3413	-	-	Elsevier
International Immunopharmacology	1567-5769	-	-	Elsevier
International Information and Library Review	1057-2317	1095-9297	Special Policy: Library and Information Science	Elsevier
International Journal for Parasitology	0020-7519	-	Special Policy: 12 months;Australian Society for Parasitology	Elsevier
International Journal for Parasitology: Drugs and Drug Resistance	2211-3207	2211-3207	Australian Society for Parasitology	Elsevier
International Journal for Parasitology: Parasites and Wildlife	-	2213-2244	Special Policy: Creative Commons	Elsevier
International Journal for Sustainable Built Environment	2212-6090	-	Gulf Organisation for Research and Development	Elsevier
International Journal of Accounting Information Systems	1467-0895	-	-	Elsevier
International Journal of Adhesion and Adhesives	0143-7496	-	-	Elsevier
International Journal of Antimicrobial Agents	0924-8579	-	International Society of Chemotherapy;Special Policy: 12 months	Elsevier
International Journal of Applied Earth Observation and Geoinformation	0303-2434	-	-	Elsevier
International Journal of Approximate Reasoning	0888-613X	-	North American Fuzzy Information Processing Society (NAFIPS);Society for Imprecise Probability: Theories and Applications (SIPTA)	Elsevier
International Journal of Aromatherapy	0962-4562	-	-	Elsevier
International Journal of Biochemistry and Cell Biology	1357-2725	-	-	Elsevier
International Journal of Biological Macromolecules	0141-8130	-	Special Policy: 12 months	Elsevier
International Journal of Cardiology	0167-5273	-	Special Policy: 12 months;International Society for Adult Congenital Heart Disease	Elsevier
International Journal of Child-Computer Interaction	2212-8689	-	-	Elsevier
International Journal of Coal Geology	0166-5162	-	-	Elsevier
International Journal of Developmental Neuroscience	0736-5748	-	International Society for Developmental Neuroscience	Elsevier
International Journal of Disaster Risk Reduction	2212-4209	-	-	Elsevier
International Journal of Drug Policy	0955-3959	-	International Harm Reduction Association;Special Policy: 12 months	Elsevier
International Journal of Educational Development	0738-0593	-	-	Elsevier
International Journal of Educational Research	0883-0355	-	-	Elsevier
International Journal of Electrical Power and Energy Systems	0142-0615	-	-	Elsevier
International Journal of Engineering Science	0020-7225	-	-	Elsevier
International Journal of Fatigue	0142-1123	-	European Structural Integrity Society	Elsevier
International Journal of Food Microbiology	0168-1605	-	International Union of Microbiological Societies (IUMS);International Committee on Food Microbiology;Special Policy: 12 months	Elsevier
International Journal of Forecasting	0169-2070	-	International Institute of Forecasters;Special Policy: 24 months	Elsevier
International Journal of Gastronomy and Food Science	1878-450X	-	AZTI-Tecnalia;Special Policy: 12 months	Elsevier
International Journal of Gerontology	1873-9598	-	Taiwan Society of Geriatric Emergency and Critical Medicine (TSGECM)	Elsevier
International Journal of Greenhouse Gas Control	1750-5836	-	-	Elsevier
International Journal of Gynecology and Obstetrics	0020-7292	1879-3479	International Federation of Gynecology and Obstetrics (FIGO);Special Policy: 12 months	Elsevier
International Journal of Heat and Fluid Flow	0142-727X	-	-	Elsevier
International Journal of Heat and Mass Transfer	0017-9310	-	-	Elsevier
International Journal of Hospitality Management	0278-4319	-	-	Elsevier
International Journal of Human-Computer Studies	1071-5819	-	Academic Press	Elsevier
International Journal of Hydrogen Energy	0360-3199	-	International Association for Hydrogen Energy	Elsevier
International Journal of Hygiene and Environmental Health	1438-4639	-	Urban and Fischer	Elsevier
International Journal of Impact Engineering	0734-743X	-	-	Elsevier
International Journal of Industrial Ergonomics	0169-8141	-	Special Policy: 24 months	Elsevier
International Journal of Industrial Organization	0167-7187	-	Special Policy: 24 months	Elsevier
International Journal of Inorganic Materials	1466-6049	-	-	Elsevier
International Journal of Intercultural Relations	0147-1767	-	International Academy for Intercultural Research;Special Policy: 24 months	Elsevier
International Journal of Law and Psychiatry	0160-2527	-	International Academy of Law and Mental Health	Elsevier
International Journal of Law, Crime and Justice	1756-0616	-	-	Elsevier
International Journal of Machine Tools and Manufacture	0890-6955	-	-	Elsevier
International Journal of Management Education	1472-8117	-	-	Elsevier
International Journal of Marine Energy'	-	2214-1669	-	Elsevier
International Journal of Mass Spectrometry	1387-3806	-	-	Elsevier
International Journal of Mechanical Sciences	0020-7403	-	-	Elsevier
International Journal of Medical Informatics	1386-5056	-	European Federation for Medical Informatics (EFMI)	Elsevier
International Journal of Medical Microbiology	1438-4221	-	Urban and Fischer	Elsevier
International Journal of Mineral Processing	0301-7516	-	-	Elsevier
International Journal of Minerals, Metallurgy and Materials	1674-4799	1869-103X	-	Elsevier
International Journal of Mining Science and Technology	2095-2686	-	-	Elsevier
International Journal of Multiphase Flow	0301-9322	-	-	Elsevier
International Journal of Mycobacteriology	2212-5531	-	-	Elsevier
International Journal of Non-Linear Mechanics	0020-7462	-	Pergamon	Elsevier
International Journal of Nursing Studies	0020-7489	-	Pergamon	Elsevier
International Journal of Obstetric Anesthesia	0959-289X	-	Obstetric Anaesthetists' Association (OAA);Churchill Livingstone	Elsevier
International Journal of Oral and Maxillofacial Surgery	0901-5027	1399-0020	Churchill Livingstone	Elsevier
International Journal of Orthopaedic and Trauma Nursing	1878-1241	-	Australia New Zealand Orthopaedic Nurses Association;Canadian Orthopaedic Nurses Association;RCN Society of Orthopaedic and Trauma Nursing	Elsevier
International Journal of Osteopathic Medicine	1746-0689	-	-	Elsevier
International Journal of Paleopathology	1879-9817	-	Paleopathology Association	Elsevier
International Journal of Pediatric Otorhinolaryngology	0165-5876	-	-	Elsevier
International Journal of Pediatric Otorhinolaryngology Extra	1871-4048	-	-	Elsevier
International Journal of Pharmaceutics	0378-5173	-	-	Elsevier
International Journal of Plasticity	0749-6419	-	-	Elsevier
International Journal of Pressure Vessels and Piping	0308-0161	-	-	Elsevier
International Journal of Production Economics	0925-5273	-	-	Elsevier
International Journal of Project Management	0263-7863	1873-4634	International Project Management Association (IPMA)	Elsevier
International Journal of Psychophysiology	0167-8760	-	International Organization of Psychophysiology	Elsevier
International Journal of Refractory Metals and Hard Materials	0263-4368	-	-	Elsevier
International Journal of Refrigeration	0140-7007	-	-	Elsevier
International Journal of Research in Marketing	0167-8116	-	European Marketing Academy	Elsevier
International Journal of Rock Mechanics and Mining Sciences	1365-1609	-	-	Elsevier
International Journal of Sediment Research	1001-6279	-	International Research and Training Center on Erosion and Sedimentation;World Association for Sedimentation and Erosion Research	Elsevier
International Journal of Solids and Structures	0020-7683	-	-	Elsevier
International Journal of Surgery	1743-9191	-	-	Elsevier
International Journal of Surgery Case Reports	2210-2612	2210-2612	-	Elsevier
International Journal of Thermal Sciences	1290-0729	-	-	Elsevier
International Review of Economics and Finance	1059-0560	-	-	Elsevier
International Review of Economics Education	-	1477-3880	-	Elsevier
International Review of Financial Analysis	1057-5219	-	-	Elsevier
International Review of Law and Economics	0144-8188	-	Special Policy: 24 months	Elsevier
Internet and Higher Education	1096-7516	-	-	Elsevier
Internet Interventions	-	2214-7829	-	Elsevier
Interventional Cardiology Clinics	2211-7458	-	Special Policy: 12 months	Elsevier
IRBM	1959-0318	-	Association FranÃ§aise des IngÃ©nieurs BiomÃ©dicaux (AFIB);SociÃ©tÃ© FranÃ§aise de GÃ©nie Biologique et MÃ©dical (SFGBM);Alliance pour le GÃ©nie Biologie et MÃ©dical (AGBM)	Elsevier
ISA Transactions	0019-0578	-	ISA	Elsevier
Isotope and Nuclear Research	0021-1907	-	Middle Eastern Regional Radioisotope Centre for the Arab Countries (MERRCAC)	Elsevier
ISPRS Journal of Photogrammetry and Remote Sensing	0924-2716	-	International Society for Photogrammetry and Remote Sensing (ISPRS)	Elsevier
Italian Journal of Medicine	1877-9344	-	Federazione delle Associazioni dei Dirigenti Ospedalieri Internisti (FADOI)	Elsevier
Italian Oral Surgery	1827-2452	-	-	Elsevier
Journal of the American College of Cardiology	0735-1097	-	American College of Cardiology;Special Policy: 12 months	Elsevier
JACC: Basic to Translational Science	-	2452-302X	Special Policy: Creative Commons Licenses	Elsevier
JACC: Cardiovascular Imaging	1936-878X	-	American College of Cardiology;Special Policy: 12 months	Elsevier
JACC: Cardiovascular Interventions	1936-8798	-	American College of Cardiology;Special Policy: 12 months	Elsevier
JACC: Clinical Electrophysiology	2405-5018	2405-500X	Special Policy: 12 months	Elsevier
JACC: Heart Failure	2213-1779	2213-1787	Special Policy: 12 months	Elsevier
Journal of The American College of Surgeons	1072-7515	-	Special Policy: 12 months	Elsevier
Journal of the American Dental Association	8177-02-01	-	Special Policy: 12 months;American Dental Association	Elsevier
Japan and the World Economy	0922-1425	-	Special Policy: 24 months	Elsevier
Japanese Dental Science Review	1882-7616	-	Japanese Association for Dental Science;Special Policy: 12 months	Elsevier
Journal of Atmospheric and Solar-Terrestrial Physics	1364-6826	-	-	Elsevier
Journal of Biomedical Informatics	1532-0464	-	Academic Press	Elsevier
Journal of Biomedical Research	1674-8301	-	-	Elsevier
Journal of Cardiothoracic and Vascular Anesthesia	1053-0770	-	Special Policy: 12 months	Elsevier
Journal of Dairy Science	0022-0302	1525-3198	American Dairy Science Association;Federation of Animal Science Societies	Elsevier
Journal of Emergency Medical Services	0197-2510	-	Elsevier Public Safety	Elsevier
Journal of Equine Veterinary Science	0737-0806	-	Equine Science Society;Special Policy: 12 months	Elsevier
Journal of Molecular Diagnostics	1525-1578	-	Special Policy: Journal of Molecular Diagnostics;Association for Molecular Pathology (AMP)	Elsevier
Joint Bone Spine	1297-319X	-	Special Policy: 12 months	Elsevier
Journal de Chirurgie	0021-7697	-	Association FranÃ§aise de Chirurgie Digestive;Association de Chirurgie HÃ©pato-Biliaire et Transplantation HÃ©patique;SociÃ©tÃ© FranÃ§aise de Chrirugie Laparoscopique;College FranÃ§ais de Chirurgie GÃ©nÃ©rale ViscÃ©rale et Digestive	Elsevier
Journal de Chirurgie ViscÃ©rale / Journal of Visceral Surgery	1878-786X	-	Special Policy: 12 months	Elsevier
Journal de GynÃ©cologie ObstÃ©trique et Biologie de la Reproduction	0368-2315	-	CollÃ¨ge National des GynÃ©cologues et ObstÃ©triciens FranÃ§ais;Special Policy: 12 months	Elsevier
Journal de MathÃ©matiques Pures et AppliquÃ©es	0021-7824	-	-	Elsevier
Journal de Neuroradiologie / Journal of Neuroradiology	0150-9861	-	SociÃ©tÃ© FranÃ§aise de Neuroradiologie (SFNR);College d'Imagerie pour la Recherche et l'Enseignement en Otorhino-Laryngologie (CIREOL);Special Policy: 12 months	Elsevier
Journal de PÃ©diatrie et de PuÃ©riculture	0987-7983	-	-	Elsevier
Journal de Radiologie diagnostique et interventionnelle	2211-5706	-	SociÃ©tÃ© FranÃ§aise de Radiologie (SFR);CollÃ¨ge des Enseignants en Radiologie de France (CERF);Special Policy: 12 months	Elsevier
Journal de ThÃ©rapie Comportementale et Cognitive	1155-1704	-	Association FranÃ§aise de ThÃ©rapie Comportementale et Cognitive (AFTCC);Special Policy: 12 months	Elsevier
Journal des Anti-Infectieux	2210-6545	-	Special Policy: 12 months	Elsevier
Journal for Nature Conservation	1617-1381	-	Urban and Fischer	Elsevier
Journal for Nurse Practitioners	1555-4155	-	-	Elsevier
Journal of AAPOS	1091-8531	-	American Association for Pediatric Ophthalmology and Strabismus;Mosby	Elsevier
Journal of Academic Librarianship	0099-1333	-	Special Policy: 12 months	Elsevier
Journal of Accounting and Economics	0165-4101	-	Special Policy: 24 months	Elsevier
Journal of Accounting and Public Policy	0278-4254	-	Special Policy: 24 months	Elsevier
Journal of Accounting Education	0748-5751	-	-	Elsevier
Journal of Acupuncture and Meridian Studies	2005-2901	-	-	Elsevier
Journal of Acute Medicine	2211-5587	-	Taiwan Society of Emergency Medicine	Elsevier
Journal of Adolescence	0140-1971	-	-	Elsevier
Journal of Adolescent Health	1054-139X	-	Society for Adolescent Health and Medicine;Special Policy: 12 months	Elsevier
Journal of Advanced Research	2090-1232	-	-	Elsevier
Journal of Aerosol Science	0021-8502	-	Pergamon;Special Policy: 24 months;European Aerosol Assembly	Elsevier
Journal of Affective Disorders	0165-0327	-	International Society for Affective Disorders;Special Policy: 12 months	Elsevier
Journal of African Earth Sciences	1464-343X	-	Geological Society of Africa	Elsevier
Journal of Aging Studies	0890-4065	-	-	Elsevier
Journal of Air Transport Management	0969-6997	-	-	Elsevier
Journal of Algebra	0021-8693	-	Academic Press	Elsevier
Journal of Algorithms in Cognition, Informatics and Logic	0196-6774	-	Academic Press	Elsevier
Journal of Allergy and Clinical Immunology	0091-6749	-	American Academy of Allergy, Asthma and Immunology;Mosby	Elsevier
Journal of Allergy and Clinical Immunology: In Practice	-	2213-2198	Special Policy: 12 months	Elsevier
Journal of Alloys and Compounds	0925-8388	-	-	Elsevier
Journal of Analytical and Applied Pyrolysis	0165-2370	-	-	Elsevier
Journal of Anthropological Archaeology	0278-4165	-	-	Elsevier
Journal of Anxiety Disorders	0887-6185	-	-	Elsevier
Journal of Applied Developmental Psychology	0193-3973	-	Special Policy: 24 months	Elsevier
Journal of Applied Geophysics	0926-9851	-	-	Elsevier
Journal of Applied Logic	1570-8683	-	-	Elsevier
Journal of Applied Mathematics and Mechanics	0021-8928	-	-	Elsevier
Journal of Applied Research in Memory and Cognition	2211-3681	-	Society for Applied Research in Memory and Cognition	Elsevier
Journal of Approximation Theory	0021-9045	-	Academic Press	Elsevier
Journal of Archaeological Science	0305-4403	1095-9238	Association for Environmental Archaeology	Elsevier
Journal of Arid Environments	0140-1963	-	Academic Press	Elsevier
Journal of Arthroplasty	0883-5403	-	American Association of Hip and Knee Surgeons;Churchill Livingstone;Special Policy: 12 months	Elsevier
Journal of Asia-Pacific Entomology	1226-8615	-	Korean Society of Applied Entomology;Taiwan Entomological Society and the Malaysian Plant Protection Society;Special Policy: 12 months	Elsevier
Journal of Asian Earth Sciences	1367-9120	-	-	Elsevier
Journal of Asian Economics	1049-0078	-	American Committee on Asian Economic Studies;Special Policy: 24 months	Elsevier
Journal of Autoimmunity	0896-8411	-	Academic Press;Special Policy: 12 months	Elsevier
Journal of Banking and Finance	0378-4266	-	-	Elsevier
Journal of Behavior Therapy and Experimental Psychiatry	7916-05-01	-	-	Elsevier
Journal of Behavioral and Experimental Economics	2214-8043	-	Special Policy: 24 months	Elsevier
Journal of Biochemical and Biophysical Methods	0165-022X	-	-	Elsevier
Journal of Biomechanics	0021-9290	-	Special Policy: 12 months;American Society of Biomechanics;European Society of Biomechanics;International Society of Biomechanics;Japanese Society for Clinical Biomechanics and Related Research;Australian and New Zealand Society of Biomechanics	Elsevier
Journal of Bioscience and Bioengineering	1389-1723	-	Society for Biotechnology, Japan (æ—¥æœ¬ç”Ÿç‰©å·¥å­¦ä¼š);Special Policy: 12 months	Elsevier
Journal of Biotechnology	0168-1656	-	Special Policy: 12 months	Elsevier
Journal of Bodywork and Movement Therapies	1360-8592	-	Association of Neuromuscular Therapists;Australian Pilates Method Association;National Association of Myofascial Trigger Point Therapists, USA;Pilates Foundation (UK);Churchill Livingston;Special Policy: 12 months	Elsevier
Journal of Bone Oncology	2212-1374	-	-	Elsevier
Journal of Building Engineering	-	2352-7102	-	Elsevier
Journal of Business Research	0148-2963	-	-	Elsevier
Journal of Business Venturing	0883-9026	-	-	Elsevier
Journal of Business Venturing Insights	2352-6734	-	Special Policy: 24 months	Elsevier
Journal of Cancer Policy	-	2213-5383	Special Policy: 12 months	Elsevier
Journal of Cardiac Failure	1071-9164	-	Heart Failure Society of America;Japanese Heart Failure Society;Churchill Livingston	Elsevier
Journal of Cardiology	0914-5087	-	Japanese College of Cardiology	Elsevier
Journal of Cardiology Cases	1878-5409	-	Japanese College of Cardiology	Elsevier
Journal of Cardiothoracic-Renal Research	1574-0668	-	-	Elsevier
Journal of Cardiovascular Computed Tomography	1934-5925	-	Society of Cardiovascular Computed Tomography	Elsevier
Journal of Cardiovascular Echography	2211-4122	-	-	Elsevier
Journal of Catalysis	0021-9517	-	Academic Press	Elsevier
Journal of Cataract and Refractive Surgery	0886-3350	-	American Society of Cataract and Refractive Surgery (ASCRS);European Society of Cataract and Refractive Surgeons (ESCRS)	Elsevier
Journal of Cereal Science	0733-5210	-	-	Elsevier
Journal of Chemical Health and Safety	1871-5532	-	American Chemical Society, Division of Chemical Health and Safety	Elsevier
Journal of Chemical Neuroanatomy	0891-0618	-	-	Elsevier
Journal of Chemical Thermodynamics	0021-9614	-	-	Elsevier
Journal of China Universities of Posts and Telecommunications	1005-8885	-	-	Elsevier
Journal of China University of Geosciences	1002-0705	-	-	Elsevier
Journal of China University of Mining and Technology	1006-1266	-	-	Elsevier
Journal of Chiropractic Humanities	1556-3499	-	-	Elsevier
Journal of Chiropractic Medicine	1556-3707	1556-3715	-	Elsevier
Journal of Choice Modelling	-	1755-5345	-	Elsevier
Journal of Chromatography A	0021-9673	-	-	Elsevier
Journal of Chromatography B	1570-0232	-	-	Elsevier
Journal of Cleaner Production	0959-6526	-	-	Elsevier
Journal of Clinical and Experimental Hepatology	0973-6883	-	Indian National Association for the Study of the Liver (INASL);Special Policy: 12 months	Elsevier
Journal of Clinical Anesthesia	0952-8180	-	American Association of Clinical Directors;Society for Airway Management (SAM);Society for Education in Anesthesia;Orthopedic Anesthesia Pain Rehabilitation Society;Special Policy: 12 months	Elsevier
Journal of Clinical Densitometry	1094-6950	-	International Society for Clinical Densitometry (ISCD);Special Policy: 12 months	Elsevier
Journal of Clinical Epidemiology	0895-4356	-	Special Policy: 12 months	Elsevier
Journal of Clinical Forensic Medicine	1353-1131	-	-	Elsevier
Journal of Clinical Gerontology and Geriatrics	2210-8335	-	Asia Pacific League of Clinical Gerontology and Geriatrics	Elsevier
Journal of Clinical Lipidology	1933-2874	-	National Lipid Association;Special Policy: 12 months	Elsevier
Journal of Clinical Neuroscience	0967-5868	-	Churchill Livingstone;Neurosurgical Society of Australasia;Australian and New Zealand Association of Neurologists;Australian and New Zealand Society for Neuropathology;Taiwan Neurosurgical Society;Asian Australasian Society of Neurological Surgeons;Special Policy: 12 months	Elsevier
Journal of Clinical Orthopaedics and Trauma	0976-5662	-	Delhi Orthopaedic Association;Special Policy: 12 months	Elsevier
Journal of Clinical Virology	1386-6532	-	Pan American Society for Clinical Virology;European Society for Clinical Virology;Special Policy: 12 months	Elsevier
Journal of Co-operative Organization and Management	-	2213-297X	-	Elsevier
Journal of Co2 Utilization	-	2212-9820	-	Elsevier
Journal of Colloid and Interface Science	0021-9797	-	-	Elsevier
Journal of Combinatorial Theory, Series A	0097-3165	-	Academic Press	Elsevier
Journal of Combinatorial Theory, Series B	0095-8956	-	Academic Press	Elsevier
Journal of Communication Disorders	0021-9924	-	Special Policy: 24 months	Elsevier
Journal of Comparative Economics	0147-5967	-	Special Policy: 24 months;Association for Comparative Economic Studies	Elsevier
Journal of Comparative Pathology	0021-9975	-	-	Elsevier
Journal of Complexity	0885-064X	-	Academic Press;Special Policy: 24 months	Elsevier
Journal of Computational and Applied Mathematics	0377-0427	-	North-Holland Publishing	Elsevier
Journal of Computational Physics	0021-9991	-	Academic Press	Elsevier
Journal of Computational Science	1877-7503	-	-	Elsevier
Journal of Computer and System Sciences	0022-0000	-	Academic Press	Elsevier
Journal of Constructional Steel Research	0143-974X	-	-	Elsevier
Journal of Contaminant Hydrology	0169-7722	-	-	Elsevier
Journal of Contemporary Accounting and Economics	1815-5669	-	-	Elsevier
Journal of Contextual Behavioral Science	2212-1447	-	Association for Contextual Behavioral Science (ACBS)	Elsevier
Journal of Controlled Release	0168-3659	1873-4995	Controlled Release Society;Japan Society of Drug Delivery System;Special Policy: 12 months	Elsevier
Journal of Corporate Finance	0929-1199	-	-	Elsevier
Journal of Cranio-Maxillofacial Surgery	1010-5182	-	European Association for Cranio-Maxillofacial Surgery	Elsevier
Journal of Criminal Justice	0047-2352	-	Special Policy: 24 months	Elsevier
Journal of Critical Care	0883-9441	-	World Federation of Societies of Intensive and Critical Care Medicine (WFSICCM);Society on Complexity in Acute Illness;Special Policy: 12 months	Elsevier
Journal of Crohn's and Colitis	1873-9946	-	European Crohn's and Colitis Organisation (ECCO);Special Policy: Policy B - Oxford Open Option B	Elsevier
Journal of Crohn's and Colitis Supplements	1873-9954	-	European Crohn's and Colitis Organisation (ECCO)	Elsevier
Journal of Crystal Growth	0022-0248	-	North-Holland Publishing	Elsevier
Journal of Cultural Heritage	1296-2074	-	-	Elsevier
Journal of Cystic Fibrosis	1569-1993	-	European Cystic Fibrosis Society	Elsevier
Journal of Dental Sciences	1991-7902	-	-	Elsevier
Journal of Dentistry	0300-5712	-	-	Elsevier
Journal of Dermatological Science	0923-1811	-	Japanese Society for Investigative Dermatology	Elsevier
Journal of Destination Marketing and Management	2212-571X	-	-	Elsevier
Journal of Development Economics	0304-3878	-	-	Elsevier
Journal of Diabetes and its Complications	1056-8727	-	-	Elsevier
Journal of Differential Equations	0022-0396	-	Academic Press	Elsevier
Journal of Discrete Algorithms	1570-8667	-	-	Elsevier
Journal of Drug Delivery Science and Technology	1773-2247	-	Special Policy: 12 months	Elsevier
Journal of Econometrics	0304-4076	-	Special Policy: 24 months	Elsevier
Journal of Economic Asymmetries	-	1703-4949	-	Elsevier
Journal of Economic Behavior and Organization	0167-2681	-	-	Elsevier
Journal of Economic Dynamics and Control	0165-1889	-	Special Policy: 24 months	Elsevier
Journal of Economic Psychology	0167-4870	-	International Association for Research in Economic Psychology	Elsevier
Journal of Economic Theory	0022-0531	-	-	Elsevier
Journal of Economics and Business	0148-6195	-	Temple University;Special Policy: 24 months	Elsevier
Journal of Electro - myography and Kinesiology	1050-6411	-	International Society of Electrophysiology and Kinesiology	Elsevier
Journal of Electroanalytical Chemistry	1572-6657	-	International Society of Electrochemistry (ISE)	Elsevier
Journal of Electrocardiology	0022-0736	-	International Society for Computerized Electrocardiology;International Society of Electrocardiology;Churchill Livingstone	Elsevier
Journal of Electron Spectroscopy and Related Phenomena	0368-2048	-	-	Elsevier
Journal of Electrostatics	0304-3886	-	-	Elsevier
Journal of Emergency Medicine	0736-4679	-	American Academy of Emergency Medicine	Elsevier
Journal of Emergency Nursing	0099-1767	-	Mosby	Elsevier
Journal of Empirical Finance	0927-5398	-	-	Elsevier
Journal of Endodontics	0099-2399	-	American Association of Endodontists	Elsevier
Journal of Energy Storage	-	2352-152X	-	Elsevier
Journal of Engineering and Technology Management	0923-4748	-	-	Elsevier
Journal of English for Academic Purposes	1475-1585	-	British Association of Lecturers in English for Academic Purposes (BALEAP)	Elsevier
Journal of Environmental Chemical Engineering	2213-3437	-	-	Elsevier
Journal of Environmental Economics and Management	0095-0696	-	Association of Environmental and Resource Economists	Elsevier
Journal of Environmental Management	0301-4797	-	Academic Press	Elsevier
Journal of Environmental Psychology	0272-4944	1522-9610	Special Policy: 24 months	Elsevier
Journal of Environmental Radioactivity	0265-931X	-	International Union of Radioecology	Elsevier
Journal of Environmental Sciences	1001-0742	-	-	Elsevier
Journal of Epidemiology and Global Health	2210-6006	-	Saudi Arabian Ministry of Health	Elsevier
Journal of Ethnopharmacology	0378-8741	-	International Society for Ethnopharmacology	Elsevier
Journal of Evidence-Based Dental Practice	1532-3382	-	Mosby;Special Policy: 12 months	Elsevier
Journal of Evidence-Based Dental Practice (Brazil Edition)	1877-069X	-	-	Elsevier
Journal of Evidence-Based Dental Practice (Portugal Edition)	1877-0681	-	-	Elsevier
Journal of Exercise Science and Fitness	1728-869X	-	Special Policy: Creative Commons Attribution Non-Commercial No-Derivatives License;Society of Chinese Scholars on Exercise Physiology and Fitness (SCSEPF);Physical Fitness Association of Hong Kong, China (PFAHK );Hong Kong Association of Sports Medicine and Sports Science (HKASMSS)	Elsevier
Journal of Exotic Pet Medicine	1557-5063	-	-	Elsevier
Journal of Experimental and Clinical Medicine	1878-3317	-	-	Elsevier
Journal of Experimental Animal Science	0939-8600	-	Urban and Fischer	Elsevier
Journal of Experimental Child Psychology	0022-0965	-	Academic Press	Elsevier
Journal of Experimental Marine Biology and Ecology	0022-0981	-	-	Elsevier
Journal of Experimental Social Psychology	0022-1031	-	-	Elsevier
Journal of Family Business Strategy	1877-8585	-	-	Elsevier
Journal of Feline Medicine and Surgery	1098-612X	-	International Society of Feline Medicine;American Association of Feline Practitioners;SAGE Publications (UK and US)	Elsevier
Journal of Financial Economics	0304-405X	-	-	Elsevier
Journal of Financial Intermediation	1042-9573	-	-	Elsevier
Journal of Financial Markets	1386-4181	-	-	Elsevier
Journal of Financial Stability	1572-3089	-	Rensselaer Polytechnic Institute, Lally School of Management and Technology	Elsevier
Journal of Fluency Disorders	0094-730X	-	International Fluency Association	Elsevier
Journal of Fluids and Structures	0889-9746	-	-	Elsevier
Journal of Fluorine Chemistry	0022-1139	-	-	Elsevier
Journal of Food Composition and Analysis	0889-1575	-	Special Policy: 12 months	Elsevier
Journal of Food Engineering	0260-8774	-	International Society of Food Engineering (ISFE);Special Policy: 12 months	Elsevier
Journal of Foot and Ankle Surgery	1067-2516	-	American College of Foot and Ankle Surgeons;Special Policy: 12 months	Elsevier
Journal of Forensic and Legal Medicine	1752-928X	-	Faculty of Legal and Forensic Medicine;Australian College of Legal Medicine	Elsevier
Journal of Forensic Radiology and Imaging	2212-4780	-	-	Elsevier
Journal of Forest Economics	1104-6899	-	Urban and Fischer;SLU UmeÃ¥, Sweden, Department of Forest Economics	Elsevier
Journal of Fuel Chemistry and Technology	1872-5813	-	-	Elsevier
Journal of Functional Analysis	0022-1236	-	Academic Press	Elsevier
Journal of Functional Foods	1756-4646	-	International Society for Nutraceuticals and Functional Foods (ISNFF);Special Policy: 12 months	Elsevier
Journal of Gastrointestinal Surgery	1091-255X	1873-4626	Society for Surgery of the Alimentary Tract;American Hepato-Pancreato-Biliary Association (AHPBA);International Society for Digestive Surgery	Elsevier
Journal of Genetics and Genomics	1673-8527	-	Science Press in China;Genetics Society of China;Chinese Academy of Sciences, Institute of Genetics and Developmental Biology	Elsevier
Journal of Geochemical Exploration	0375-6742	-	-	Elsevier
Journal of Geodynamics	0264-3707	-	-	Elsevier
Journal of Geometry and Physics	0393-0440	-	North-Holland Publishing	Elsevier
Journal of Geriatric Oncology	1879-4068	-	International Society of Geriatric Oncology (SIOG)	Elsevier
Journal of Great Lakes Research	0380-1330	-	International Association for Great Lakes Research	Elsevier
Journal of Hand Surgery (European Volume)	0266-7681	-	British Society for Surgery of the Hand	Elsevier
Journal of Hand Therapy	0894-1130	-	American Society of Hand Therapists;Hanley and Belfus Medical Publishers	Elsevier
Journal of Hazardous Materials	0304-3894	-	-	Elsevier
Journal of Health Economics	0167-6296	-	-	Elsevier
Journal of Heart and Lung Transplantation	1053-2498	-	International Society for Heart and Lung Transplantation	Elsevier
Journal of Hepatology	0168-8278	-	European Association for the Study of the Liver (EASL)	Elsevier
Journal of Herbal Medicine	2210-8033	-	National Institute of Medical Herbalists;Urban and Fischer	Elsevier
Journal of High Technology Management Research	1047-8310	-	Special Policy: 24 months	Elsevier
Journal of Historical Geography	0305-7488	-	Special Policy: 24 months	Elsevier
Journal of Hospital Infection	0195-6701	-	Hospital Infection Society;Special Policy: 12 months	Elsevier
Journal of Hospitality and Tourism Management	1447-6770	1839-5260	Council for Australian University Tourism and Hospitality Education (CAUTHE);Cambridge University Press (CUP);Australian Academic Press	Elsevier
Journal of Hospitality, Leisure, Sport and Tourism Education	1473-8376	-	-	Elsevier
Journal of Housing Economics	1051-1377	-	-	Elsevier
Journal of Human Evolution	0047-2484	-	Academic Press	Elsevier
Journal of Hydro-environment Research	1570-6443	-	Korea Water Resources Association	Elsevier
Journal of Hydrodynamics	1001-6058	-	Springer Verlag (Germany)	Elsevier
Journal of Hydrology	0022-1694	-	-	Elsevier
Journal of Hydrology Regional Studies	-	2214-5818	Special Policy: Creative Commons Licenses	Elsevier
Journal of Immunological Methods	0022-1759	-	Association of Medical Laboratory Immunologists	Elsevier
Journal of Industrial and Engineering Chemistry	1226-086X	-	Korean Society of Industrial and Engineering Chemistry	Elsevier
Journal of Infection	0163-4453	-	British Infection Society	Elsevier
Journal of Infection and Chemotherapy	1341-321X	1437-7780	Special Policy: 12 months;Japanese Society of Chemotherapy;Japanese Association for Infectious Diseases;Springer Verlag (Germany)	Elsevier
Journal of Infection and Public Health	1876-0341	-	Saudi Arabian National Guard Health Affairs and King Saud Bin Abdulaziz University for Health Sciences;Saudi Association for Public Health	Elsevier
Journal of Information Security and Applications	-	2214-2126	-	Elsevier
Journal of Informetrics	1751-1577	-	-	Elsevier
Journal of Inorganic Biochemistry	0162-0134	-	-	Elsevier
Journal of Insect Physiology	0022-1910	-	Pergamon	Elsevier
Journal of Integrative Agriculture	2095-3119	-	Chinese Academy of Agricultural Sciences (CAAS)	Elsevier
Journal of Interactive Marketing	1094-9968	1520-6653	Direct Marketing Educational Foundation	Elsevier
Journal of International Accounting, Auditing and Taxation	1061-9518	-	Special Policy: 24 months	Elsevier
Journal of International Economics	0022-1996	-	-	Elsevier
Journal of International Financial Markets, Institutions and Money	1042-4431	-	-	Elsevier
Journal of International Management	1075-4253	-	Special Policy: 24 months	Elsevier
Journal of International Money and Finance	0261-5606	-	-	Elsevier
Journal of Invertebrate Pathology	0022-2011	-	Society for Invertebrate Pathology;Academic Press	Elsevier
Journal of Investigative Dermatology	0022-202X	1523-1747	-	Elsevier
Journal of Iron and Steel Research, International	1006-706X	-	Central Iron and Steel Research Institute	Elsevier
Journal of King Saud University (Computer and Information Sciences)	1319-1578	-	King Saud University;Special Policy: Creative Commons Attribution Non-Commercial No-Derivatives License	Elsevier
Journal of King Saud University (Engineering Science)	1018-3639	-	Special Policy: Creative Commons Attribution Non-Commercial No-Derivatives License;King Saud University Press	Elsevier
Journal of King Saud University (Languages and Translation)	2210-8319	-	King Saud University	Elsevier
Journal of King Saud University - Science	1018-3647	-	King Saud University;Special Policy: Creative Commons Attribution Non-Commercial No-Derivatives License	Elsevier
Journal of Laboratory and Clinical Medicine	0022-2143	-	Central Society for Clinical Research	Elsevier
Journal of Laboratory Automation	2211-0682	1540-2452	Society for Laboratory Automation and Screening;SAGE Publications (UK and US)	Elsevier
Journal of Logic and Algebraic Programming	1567-8326	-	North-Holland	Elsevier
Journal of Loss Prevention in the Process Industries	0950-4230	-	-	Elsevier
Journal of Luminescence	0022-2313	-	North-Holland Publishing	Elsevier
Journal of Macroeconomics	0164-0704	-	-	Elsevier
Journal of Magnetic Resonance	1090-7807	-	-	Elsevier
Journal of Magnetism and Magnetic Materials	0304-8853	-	North-Holland Publishing	Elsevier
Journal of Manipulative and Physiological Therapeutics	0161-4754	-	Mosby	Elsevier
Journal of Manufacturing Processes	1526-6125	-	Society of Manufacturing Engineers (SME)	Elsevier
Journal of Manufacturing Systems	0278-6125	-	Society of Manufacturing Engineers (SME)	Elsevier
Journal of Marine and Island Cultures	2212-6821	-	Mokpo National University, Institution for Marine and Island Cultures	Elsevier
Journal of Marine Systems	0924-7963	-	-	Elsevier
Journal of Materials Processing Technology	0924-0136	-	Special Policy: 24 months	Elsevier
Journal of Materials Science and Technology	1005-0302	-	Chinese Society for Metals	Elsevier
Journal of Materiomics	-	2352-8478	Special Policy: Creative Commons Attribution Non-Commercial No-Derivatives License;Chinese Ceramic Society	Elsevier
Journal of Mathematical Analysis and Applications	0022-247X	-	Academic Press	Elsevier
Journal of Mathematical Behavior	0732-3123	-	-	Elsevier
Journal of Mathematical Economics	0304-4068	-	-	Elsevier
Journal of Mathematical Psychology	0022-2496	-	Special Policy: 24 months;Society for Mathematical Psychology	Elsevier
Journal of Medical Colleges of PLA	1000-1948	-	Chinese People's Liberation Army	Elsevier
Journal of Medical Hypotheses and Ideas	2251-7294	-	-	Elsevier
Journal of Medical Imaging and Radiation Sciences	1939-8654	-	Canadian Association of Medical Radiation Technology	Elsevier
Journal of Medical Ultrasound	0929-6441	-	Asian Federation of Societies for Ultrasound in Medicine and Biology;Chinese Taipei Society of Ultrasound in Medicine	Elsevier
Journal of Medieval History	0304-4181	1873-1279	Special Policy: SSH Titles	Elsevier
Journal of Membrane Science	0376-7388	-	-	Elsevier
Journal of Memory and Language	0749-596X	-	-	Elsevier
Journal of Men's Health and Gender	1571-8913	-	-	Elsevier
Journal of Microbiological Methods	0167-7012	-	-	Elsevier
Journal of Microbiology, Immunology and Infection	1684-1182	-	Taiwan Society of Microbiology;Chinese Society of Immunology;Infectious Diseases Society of Taiwan;Taiwan Society of Parasitology	Elsevier
Journal of Midwifery and Women's Health	1526-9523	1542-2011	American College of Nurse-Midwives	Elsevier
Journal of Minimally Invasive Gynecology	1553-4650	-	-	Elsevier
Journal of Molecular and Cellular Cardiology	0022-2828	-	Academic Press	Elsevier
Journal of Molecular Biology	0022-2836	-	Academic Press	Elsevier
Journal of Molecular Catalysis A: Chemical	1381-1169	-	-	Elsevier
Journal of Molecular Catalysis B: Enzymatic	1381-1177	-	-	Elsevier
Journal of Molecular Graphics and Modelling	1093-3263	-	Molecular Graphics and Modelling Society (MGMS);American Chemical Society, Computers in Chemistry (COMP) Division	Elsevier
Journal of Molecular Liquids	0167-7322	-	-	Elsevier
Journal of Molecular Spectroscopy	0022-2852	-	Special Policy: 12 months	Elsevier
Journal of Molecular Structure	0022-2860	-	-	Elsevier
Journal of Molecular Structure: THEOCHEM	0166-1280	-	-	Elsevier
Journal of Monetary Economics	0304-3932	-	Special Policy: 24 months	Elsevier
Journal of Multinational Financial Management	1042-444X	-	Special Policy: 24 months	Elsevier
Journal of Multivariate Analysis	0047-259X	-	Academic Press	Elsevier
Journal of Nanjing Medical University	1007-4376	-	Nanjing Medical University	Elsevier
Journal of Natural Gas Chemistry	1003-9953	-	-	Elsevier
Journal of Natural Gas Science and Engineering	1875-5100	-	-	Elsevier
Journal of Neonatal Nursing	1355-1841	-	Neonatal Nurses Association	Elsevier
Journal of Network and Computer Applications	1084-8045	-	Academic Press	Elsevier
Journal of Neuroimmunology	0165-5728	-	International Society for Neuroimmunology	Elsevier
Journal of Neurolinguistics	0911-6044	-	-	Elsevier
Journal of Neuroscience Methods	0165-0270	-	-	Elsevier
Journal of Non-Crystalline Solids	0022-3093	-	North-Holland Publishing	Elsevier
Journal of Non-Newtonian Fluid Mechanics	0377-0257	-	-	Elsevier
Journal of Northeast Agricultural University (English edition)	1006-8104	-	Northeast Agricultural University	Elsevier
Journal of Nuclear Materials	0022-3115	-	North-Holland Publishing	Elsevier
Journal of Number Theory	0022-314X	-	Academic Press	Elsevier
Journal of Nutrition Education and Behavior	1499-4046	-	Society for Nutrition Education	Elsevier
Journal of Nutritional Biochemistry	0955-2863	-	-	Elsevier
Journal of Obsessive-Compulsive and Related Disorders	2211-3649	-	-	Elsevier
Journal of Obstetric, Gynecologic, and Neonatal Nursing	0884-2175	1552-6909	Association of Women's Health, Obstetric and Neonatal Nurses (AWHONN);Wiley	Elsevier
Journal of Optometry	1888-4296	1989-1342	Special Policy: 12 months;Consejo General de Colegios de Ã“pticos-Optometristas de EspaÃ±a	Elsevier
Journal of Oral and Maxillofacial Surgery	0278-2391	-	American Association of Oral and Maxillofacial Surgeons;Special Policy: 12 months	Elsevier
Journal of Oral and Maxillofacial Surgery, Medicine, and Pathology	2212-5558	-	Special Policy: 12 months	Elsevier
Journal of Oral Biology and Craniofacial Research	2212-4268	-	Craniofacial Research Foundation;Special Policy: 12 months	Elsevier
Journal of Oral Biosciences	1349-0079	-	Japanese Association for Oral Biology;Special Policy: 12 months	Elsevier
Journal of Organometallic Chemistry	0022-328X	-	-	Elsevier
Journal of Orthopaedic Nursing	1361-3111	-	Australia New Zealand Orthopaedic Nurses Association;Canadian Orthopaedic Nurses Association;RCN Society of Orthopaedic and Trauma Nursing;Churchill Livingstone	Elsevier
Journal of Orthopaedic Science	0949-2658	1436-2023	Japanese Orthopaedic Association;Special Policy: 12 months	Elsevier
Journal of Orthopaedics	0972-978X	-	Special Policy: 12 months	Elsevier
Journal of Pain	1526-5900	-	American Pain Society;Special Policy: 12 months	Elsevier
Journal of Pain and Symptom Management	0885-3924	-	American Academy of Hospice and Palliative Medicine;National Hospice and Palliative Care Organization;U.S. Cancer Pain Relief Committee;Special Policy: 12 months	Elsevier
Journal of Parallel and Distributed Computing	0743-7315	-	Academic Press	Elsevier
Journal of Pediatric and Adolescent Gynecology	1083-3188	-	North American Society of Pediatric and Adolescent Gynecology	Elsevier
Journal of Pediatric Health Care	0891-5245	-	National Association of Pediatric Nurse Practitioners;Mosby	Elsevier
Journal of Pediatric Nursing	0882-5963	-	Society of Pediatric Nurses;Pediatric Endocrinology Nursing Society (PENS);Special Policy: 12 months	Elsevier
Journal of Pediatric Surgery	0022-3468	-	British Association of Paediatric Surgeons;American Pediatric Surgical Association;Pacific Association of Pediatric Surgeons;American Academy of Pediatrics;Canadian Association of Paediatric Surgeons	Elsevier
Journal of Pediatric Surgery Case Reports	-	2213-5766	-	Elsevier
Journal of Pediatric Urology	1477-5131	-	European Society for Pediatric Urology (ESPU);Sociedad Iberoamericana de Urologia Pediatrica (SIUP);Asia Pacific Association of Pediatric Urology (APAPU);Saudi Pediatric Urology Group (SPUG);Nucl o de Urologia PediÃ¡trica da Escola Paulista de Medicina (NUPEP)	Elsevier
Journal of Pediatrics	0022-3476	-	Mosby;Special Policy: 12 months	Elsevier
Journal of PeriAnesthesia Nursing	1089-9472	-	American Society of PeriAnesthesia Nurses;Special Policy: 12 months	Elsevier
Journal of Petroleum Science and Engineering	0920-4105	-	-	Elsevier
Journal of Pharmaceutical Analysis	2095-1779	-	Xi'an Jiaotong University	Elsevier
Journal of Pharmaceutical and Biomedical Analysis	0731-7085	-	American Association of Pharmaceutical Scientists	Elsevier
Journal of Pharmaceutical Sciences	0022-3549	1520-6017	American Pharmacists Association;Special Policy: 12 months	Elsevier
Journal of Pharmacological and Toxicological Methods	1056-8719	-	Special Policy: 12 months	Elsevier
Journal of Pharmacological Sciences	1347-8613	1347-8648	Special Policy: Creative Commons Attribution Non-Commercial No-Derivatives License;Japanese Pharmacological Society	Elsevier
Journal of Phonetics	0095-4470	-	-	Elsevier
Journal of Photochemistry and Photobiology A: Chemistry	1010-6030	-	-	Elsevier
Journal of Photochemistry and Photobiology B: Biology	1011-1344	-	-	Elsevier
Journal of Photochemistry and Photobiology C: Photochemistry Reviews	1389-5567	-	Japanese Photochemistry Association	Elsevier
Journal of Physics and Chemistry of Solids	0022-3697	-	-	Elsevier
Journal of Physiology - Paris	0928-4257	-	-	Elsevier
Journal of Physiotherapy	1836-9553	1836-9561	Special Policy: Creative Commons Attribution Non-Commercial No-Derivatives License;Australian Physiotherapy Association	Elsevier
Journal of Plant Physiology	0176-1617	-	Urban and Fischer	Elsevier
Journal of Plastic, Reconstructive and Aesthetic Surgery	1748-6815	-	British Association of Plastic, Reconstructive and Aesthetic Surgeons (BAPRAS);SocietÃ Italiana di Chirurgia Plastica Ricostruttiva ed Estetica (SICPRE)	Elsevier
Journal of Policy Modeling	0161-8938	-	Society for Policy Modeling;Special Policy: 24 months	Elsevier
Journal of Power Sources	0378-7753	-	-	Elsevier
Journal of Pragmatics	0378-2166	-	-	Elsevier
Journal of Process Control	0959-1524	-	-	Elsevier
Journal of Professional Nursing	8755-7223	-	American Association of Colleges of Nursing;Special Policy: 12 months	Elsevier
Journal of Prosthetic Dentistry	0022-3913	-	Mosby	Elsevier
Journal of Prosthodontic Research	1883-1958	-	Japan Prosthodontic Society	Elsevier
Journal of Proteomics	1874-3919	-	European Proteomics Association (EuPA)	Elsevier
Journal of Psychiatric Research	0022-3956	-	-	Elsevier
Journal of Psychosomatic Research	0022-3999	-	European Association for Consultation-Liaison Psychiatry and Psychosomatics;International College of Psychosomatic Medicine	Elsevier
Journal of Public Economics	0047-2727	-	Special Policy: 24 months	Elsevier
Journal of Purchasing and Supply Management	1478-4092	-	-	Elsevier
Journal of Pure and Applied Algebra	0022-4049	-	North-Holland Publishing	Elsevier
Journal of Quantitative Spectroscopy and Radiative Transfer	0022-4073	-	Pergamon	Elsevier
Journal of Radiology Nursing	1546-0843	-	Association for Radiologic and Imaging Nursing (ARIN)	Elsevier
Journal of Rail Transport Planning and Management	2210-9706	-	-	Elsevier
Journal of Rare Earths	1002-0721	-	Chinese Society of Rare Earth	Elsevier
Journal of Renal Nutrition	1051-2276	-	Council on Renal Nutrition of the National Kidney Foundation;International Society of Renal Nutrition and Metabolism;Special Policy: 12 months	Elsevier
Journal of Reproduction and Contraception	1001-7844	-	Shanghai Institute of Planned Parenthood Research;WHO Special Programme of Research, Development and Research Training in Human Reproduction (HRP);National Population and Family Planning Commission, P. R. China	Elsevier
Journal of Reproductive Immunology	0165-0378	-	-	Elsevier
Journal of Research in Personality	0092-6566	-	Special Policy: 24 months	Elsevier
Journal of Retailing	0022-4359	-	-	Elsevier
Journal of Retailing and Consumer Services	0969-6989	-	-	Elsevier
Journal of Rural Studies	0743-0167	-	-	Elsevier
Journal of Safety Research	0022-4375	-	National Safety Council	Elsevier
Journal of Saudi Chemical Society	1319-6103	-	King Saud University;Saudi Chemical Society	Elsevier
Journal of School Psychology	0022-4405	-	Society for the Study of School Psychology (SSSP);Special Policy: 24 months	Elsevier
Journal of Science and Medicine in Sport	1440-2440	-	Sports Medicine Australia (SMA);Australasian Academy of Podiatric Sports Medicine (AAPSM);Exercise and Sports Science Australia (ESSA);Australian Physiotherapy Association - Sports Physiotherapy Australia (SPA);College of Sport Psychologists (COSP);Sports Dietitians Australia (SDA);Sports Doctors Australia (SDrA);Australasian College of Sports Physicians (ACSP)	Elsevier
Journal of Sea Research	1385-1101	-	NIOZ Royal Netherlands Institute for Sea Research	Elsevier
Journal of Second Language Writing	1060-3743	-	-	Elsevier
Journal of Shoulder and Elbow Surgery	1058-2746	-	American Shoulder and Elbow Surgeons;Mosby	Elsevier
Journal of Social Studies Research	0885-985X	-	International Society for the Social Studies;Philosophy Documentation Center	Elsevier
Journal of Socio-Economics	1053-5357	-	-	Elsevier
Journal of Solid State Chemistry	0022-4596	-	-	Elsevier
Journal of Sound and Vibration	0022-460X	-	-	Elsevier
Journal of South American Earth Sciences	0895-9811	-	-	Elsevier
Journal of Statistical Planning and Inference	0378-3758	-	North-Holland	Elsevier
Journal of Steroid Biochemistry and Molecular Biology	0960-0760	-	Special Policy: 12 months	Elsevier
Journal of Stored Products Research	0022-474X	-	-	Elsevier
Journal of Strategic Information Systems	0963-8687	-	Special Policy: 24 months	Elsevier
Journal of Stroke and Cerebrovascular Diseases	1052-3057	-	National Stroke Association;Japan Stroke Society;Special Policy: 12 months	Elsevier
Journal of Structural Biology	1047-8477	-	Academic Press	Elsevier
Journal of Structural Geology	0191-8141	-	-	Elsevier
Journal of Substance Abuse Treatment	0740-5472	-	-	Elsevier
Journal of Supercritical Fluids	0896-8446	-	-	Elsevier
Journal of Supportive Oncology	1544-6794	-	International Medical News Group	Elsevier
Journal of Surgical Education	1931-7204	-	Association of Program Directors in Surgery;Gary P. Wratten Surgical Society (U.S. Army);Society of Air Force Clinical Surgeons	Elsevier
Journal of Surgical Research	0022-4804	-	Association for Academic Surgery;Academic Press	Elsevier
Journal of Symbolic Computation	0747-7171	-	Academic Press	Elsevier
Journal of Systems and Software	0164-1212	-	-	Elsevier
Journal of Systems Architecture	1383-7621	-	North-Holland;Euromicro	Elsevier
Journal of Taibah University for Science	-	1658-3655	Special Policy: Creative Commons Attribution Non-Commercial No-Derivatives License	Elsevier
Journal of Terramechanics	0022-4898	-	International Society for Terrain-Vehicle Systems	Elsevier
Journal of the Academy of Nutrition and Dietetics	2212-2672	-	Academy of Nutrition and Dietetics	Elsevier
Journal of the American Academy of Child and Adolescent Psychiatry	0890-8567	-	Special Policy: 12 months	Elsevier
Journal of The American Academy of Dermatology	0190-9622	-	American Academy of Dermatology;Mosby;Special Policy: 12 months	Elsevier
Journal of the American College of Certified Wound Specialists	1876-4983	-	American College of Certified Wound Specialists	Elsevier
Journal of the American College of Clinical Wound Specialists	2213-5103	-	Special Policy: 12 months	Elsevier
Journal of the American College of Radiology	1546-1440	-	American College of Radiology;Special Policy: 12 months	Elsevier
Journal of The American Dietetic Association	8223-02-01	-	American Dietetic Association	Elsevier
Journal of the American Medical Directors Association	1525-8610	-	American Medical Directors Association	Elsevier
Journal of the American Medical Informatics Association	1067-5027	1527-974X	American Medical Informatics Association (AMIA);Hanley and Belfus Medical Publishers	Elsevier
Journal of The American Society for Mass Spectrometry	1044-0305	1879-1123	American Society for Mass Spectrometry;Springer Verlag (Germany)	Elsevier
Journal of The American Society of Echocardiography	0894-7317	-	American Society of Echocardiography;Special Policy: 12 months	Elsevier
Journal of the American Society of Hypertension	1933-1711	-	American Society of Hypertension (ASH);Special Policy: 12 months	Elsevier
Journal of The Association for Laboratory Automation	1535-5535	-	Association for Laboratory Automation;SAGE Publications (UK and US)	Elsevier
Journal of the Association of Nurses in AIDS Care	1055-3290	-	Association of Nurses in AIDS Care	Elsevier
Journal of the Chinese Institute of Chemical Engineers	0368-1653	-	Taiwan Institute of Chemical Engineers	Elsevier
Journal of the Chinese Medical Association	1726-4901	-	Chinese Medical Association	Elsevier
Journal of the Economics of Ageing	2212-828X	-	-	Elsevier
Journal of the Egyptian Mathematical Society	1110-256X	-	Egyptian Mathematical Society	Elsevier
Journal of the Energy Institute	1743-9671	1746-0220	Energy Institute;Maney Publishing	Elsevier
Journal of the European Ceramic Society	0955-2219	-	European Ceramic Society	Elsevier
Journal of the Formosan Medical Association	0929-6646	-	Formosan Medical Association	Elsevier
Journal of The Franklin Institute	0016-0032	-	-	Elsevier
Journal of the Japanese and International Economies	0889-1583	-	Special Policy: 24 months	Elsevier
Journal of the Korean Statistical Society	1226-3192	-	Korean Statistical Society	Elsevier
Journal of the Mechanical Behavior of Biomedical Materials	1751-6161	-	-	Elsevier
Journal of the Mechanics and Physics of Solids	0022-5096	-	-	Elsevier
Journal of the National Medical Association	1943-4693	0027-9684	Special Policy: 12 months	Elsevier
Journal of the Neurological Sciences	0022-510X	-	World Federation of Neurology	Elsevier
Journal of the Saudi Heart Association	1016-7315	-	King Saud University;Saudi Heart Association	Elsevier
Journal of the Saudi Society for Agricultural Sciences	1658-077X	-	King Saud University;Saudi Society for Agricultural Sciences	Elsevier
Journal of the Saudi Society for Dermatology and Dermatologic Surgery	2210-836X	-	Saudi Society for Dermatology and Dermatologic Surgery;King Saud University	Elsevier
Journal of the Society for Gynecologic Investigation	1071-5576	-	Society for Gynecologic Investigation	Elsevier
Journal of the Taiwan Institute of Chemical Engineers	1876-1070	-	-	Elsevier
Journal of the World Federation of Orthodontists	2212-4438	-	Special Policy: 12 months	Elsevier
Journal of Theoretical Biology	0022-5193	-	Academic Press	Elsevier
Journal of Thermal Biology	0306-4565	-	-	Elsevier
Journal of Thoracic and Cardiovascular Surgery	0022-5223	-	Mosby	Elsevier
Journal of Thoracic Oncology	1556-0864	1556-1380	International Association for the Study of Lung Cancer;Special Policy: 12 months;Lippincott, Williams & Wilkins	Elsevier
Journal of Tissue Viability	0965-206X	-	Tissue Viability Society	Elsevier
Journal of Trace Elements in Medicine and Biology	0946-672X	-	Federation of European Societies on Trace Elements and Minerals (FESTEM);Urban and Fischer	Elsevier
Journal of Traditional Chinese Medicine	0255-2922	-	China Association of Chinese Medicine	Elsevier
Journal of Transport and Health	-	2214-1405	-	Elsevier
Journal of Transport Geography	0966-6923	-	-	Elsevier
Journal of Transportation Systems Engineering and Information Technology	1570-6672	-	Systems Engineering Society of China (SESC)	Elsevier
Journal of Ultrasound	1971-3495	-	Italian Society of Ultrasonology in Medicine and Biology (SIUMB)	Elsevier
Journal of University of Science and Technology Beijing	1005-8850	-	University of Science and Technology Beijing	Elsevier
Journal of Urban Economics	0094-1190	-	Special Policy: 24 months	Elsevier
Journal of Vascular Nursing	1062-0303	-	Society for Vascular Nursing;Mosby;Special Policy: 12 months	Elsevier
Journal of Vascular Surgery	0741-5214	-	Society for Vascular Surgery;Mosby;Special Policy: 12 months	Elsevier
Journal of Vascular Surgery Cases	-	2352-667X	Special Policy: Creative Commons Attribution Non-Commercial No-Derivatives License;Society for Vascular Surgery	Elsevier
Journal of Veterinary Behavior: Clinical Applications and Research	1558-7878	-	Australian Veterinary Behaviour Interest Group: a special interest group of the Australian Veterinary Association;International Working Dog Breeding Association	Elsevier
Journal of Veterinary Cardiology	1760-2734	-	European Society of Veterinary Cardiology (ESVC)	Elsevier
Journal of Virological Methods	0166-0934	-	-	Elsevier
Journal of Visceral Surgery	1878-7886	-	-	Elsevier
Journal of Visual Communication and Image Representation	1047-3203	-	Academic Press	Elsevier
Journal of Visual Languages and Computing	1045-926X	-	Academic Press	Elsevier
Journal of Vocational Behavior	8791-01-01	1095-9084	-	Elsevier
Journal of Voice	0892-1997	-	Voice Foundation;International Association of Phonosurgeons;Mosby	Elsevier
Journal of Volcanology and Geothermal Research	0377-0273	-	-	Elsevier
Journal of Water Process Engineering	-	2214-7144	-	Elsevier
Journal of Web Semantics	1570-8268	-	-	Elsevier
Journal of Wind Engineering and Industrial Aerodynamics	0167-6105	-	International Association for Wind Engineering	Elsevier
Journal of World Business	1090-9516	-	-	Elsevier
JVIR: Journal of Vascular and Interventional Radiology	1051-0443	-	Society of Interventional Radiology;Special Policy: 12 months	Elsevier
Kaohsiung Journal of Medical Sciences	1607-551X	-	Kaohsiung Medical University	Elsevier
Kidney International	0085-2538	1523-1755	International Society of Nephrology;Special Policy: 12 months	Elsevier
Kidney International Supplements	2157-1724	2157-1716	International Society of Nephrology;Special Policy: 12 months	Elsevier
Kidney Research and Clinical Practice	2211-9132	-	Korean Society of Nephrology	Elsevier
KinÃ©sithÃ©rapie, la Revue	1779-0123	-	Special Policy: 12 months	Elsevier
King Saud University Journal of Dental Science	2210-8157	-	King Saud University	Elsevier
Knee	0968-0160	-	Australian Knee Society (AKS);British Association for Surgery of the Knee (BASK)	Elsevier
Knowledge-Based Systems	0950-7051	-	-	Elsevier
KomplementÃ¤re und integrative Medizin	1863-8678	-	Urban and Fischer	Elsevier
Krankenhaus-Hygiene and InfektionsverhÃ¼tung	0720-3373	-	Urban and Fischer	Elsevier
L.O.G.O.S. INTERDISZIPLINAR	0944-405X	-	Urban and Fischer	Elsevier
La Revue d'HomÃ©opathie	1878-9730	-	Special Policy: 12 months;FÃ©dÃ©ration Nationale des SociÃ©tÃ©s MÃ©dicales HomÃ©opathiques de France (FNSMH)	Elsevier
Labour Economics	0927-5371	-	European Association of Labour Economists	Elsevier
Lancet	0140-6736	1474-547X	Special Policy: Lancet	Elsevier
Lancet (North American Edition)	0099-5355	-	Special Policy: Lancet	Elsevier
Lancet Child and Adolescent Health	-	2352-4642	Special Policy: Lancet	Elsevier
Lancet Diabetes and Endocrinology	2213-8587	2213-8595	Special Policy: Lancet	Elsevier
Lancet Gastroenterology and Hepatology	-	2468-1253	Special Policy: Lancet	Elsevier
Lancet Global Health	-	2214-109X	Special Policy: Creative Commons Licenses	Elsevier
Lancet Haematology	-	2352-3026	Special Policy: Lancet	Elsevier
Lancet HIV	2405-4704	2352-3018	Special Policy: Lancet	Elsevier
Lancet Infectious Diseases	1473-3099	1474-4457	Special Policy: Lancet	Elsevier
Lancet Neurology	1474-4422	1474-4465	Special Policy: Lancet	Elsevier
Lancet Oncology	1470-2045	1474-5488	Special Policy: Lancet	Elsevier
Lancet Planetary Health	-	2542-5196	Special Policy: Creative Commons Licenses	Elsevier
Lancet Psychiatry	2215-0366	2215-0374	Special Policy: Lancet	Elsevier
Lancet Public Health	-	2468-2667	Special Policy: Creative Commons Licenses	Elsevier
Lancet Respiratory Medicine	2213-2600	-	Special Policy: Lancet	Elsevier
Land Use Policy	0264-8377	-	-	Elsevier
Landscape and Urban Planning	0169-2046	-	-	Elsevier
Language and Communication	0271-5309	-	Special Policy: 24 months	Elsevier
Language Sciences	0388-0001	-	-	Elsevier
Leadership Quarterly	1048-9843	-	International Leadership Association	Elsevier
Learning and Individual Differences	1041-6080	-	-	Elsevier
Learning and Instruction	0959-4752	-	European Association for Research on Learning and Instruction (EARLI)	Elsevier
Learning and Motivation	0023-9690	-	-	Elsevier
Learning, Culture and Social Interaction	2210-6561	-	-	Elsevier
Legal Medicine	1344-6223	-	Japanese Society of Legal Medicine	Elsevier
Leukemia Research	0145-2126	-	-	Elsevier
Leukemia Research Reports	-	2213-0489	Special Policy: Creative Commons	Elsevier
Library and Information Science Research	0740-8188	-	-	Elsevier
Library Collections, Acquisitions, and Technical Services	1464-9055	1873-1821	Special Policy: Library and Information Science	Elsevier
Life Sciences	0024-3205	-	-	Elsevier
Limnologica	0075-9511	-	Urban and Fischer	Elsevier
Linear Algebra and its Applications	0024-3795	-	-	Elsevier
Lingua	0024-3841	-	-	Elsevier
Linguistics and Education	0898-5898	-	Special Policy: 24 months	Elsevier
Lithos	0024-4937	-	-	Elsevier
Livestock Science	1871-1413	-	-	Elsevier
Long Range Planning	0024-6301	-	Strategic Planning Society;European Strategic Planning Federation	Elsevier
Lung Cancer	0169-5002	-	Special Policy: 12 months;Associazione Italiana di Oncologia Toracica	Elsevier
LWT - Food Science and Technology	0023-6438	-	Swiss Society of Food Science and Technology (SGLWT/SOSSTA);International Union of Food Science and Technology (IUFoST);Special Policy: 12 months	Elsevier
Magnetic Resonance Imaging	0730-725X	-	-	Elsevier
Magnetic Resonance Imaging Clinics of North America	1064-9689	-	Special Policy: 12 months	Elsevier
Mammalian Biology	1616-5047	-	Urban and Fischer;Special Policy: 12 months;Deutsche Gesellschaft fÃ¼r SÃ¤ugetierkunde (German Society of Mammalogy)	Elsevier
Management Accounting Research	1044-5005	-	Special Policy: 24 months	Elsevier
Manual Therapy	1356-689X	-	Musculoskeletal Association of Chartered Physiotherapists, UK;Belgische Wetenschappelijke vereniging voor Manuele Therapie;Belgische Vereniging van Manueel Therapeuten;Churchill Livingstone	Elsevier
Marine and Petroleum Geology	0264-8172	-	-	Elsevier
Marine Chemistry	0304-4203	-	-	Elsevier
Marine Environmental Research	0141-1136	-	-	Elsevier
Marine Genomics	1874-7787	-	-	Elsevier
Marine Geology	0025-3227	-	-	Elsevier
Marine Micropaleontology	0377-8398	-	-	Elsevier
Marine Policy	0308-597X	-	-	Elsevier
Marine Pollution Bulletin	0025-326X	-	-	Elsevier
Marine Structures	0951-8339	-	International Ship and Offshore Structures Congress	Elsevier
Materials and Design	0261-3069	0264-1275	Special Policy: Creative Commons Licenses	Elsevier
Materials Characterization	1044-5803	-	International Metallographic Society	Elsevier
Materials Chemistry and Physics	0254-0584	-	Materials Research Society-Taiwan (MRS-T)	Elsevier
Materials Letters	0167-577X	-	-	Elsevier
Materials Research Bulletin	0025-5408	-	-	Elsevier
Materials Science and Engineering: A	0921-5093	-	-	Elsevier
Materials Science and Engineering: B	0921-5107	-	-	Elsevier
Materials Science and Engineering: C	0928-4931	-	-	Elsevier
Materials Science and Engineering: R: Reports	0927-796X	-	Special Policy: 24 months	Elsevier
Materials Science in Semiconductor Processing	1369-8001	-	-	Elsevier
Materials Today	1369-7021	1369-7021	-	Elsevier
Materials Today: Proceedings	-	2214-7853	-	Elsevier
Mathematical and Computer Modelling	0895-7177	-	-	Elsevier
Mathematical Biosciences	0025-5564	-	-	Elsevier
Mathematical Social Sciences	0165-4896	-	-	Elsevier
Mathematics and Computers in Simulation	0378-4754	-	International Association for Mathematics and Computers in Simulation (IMACS);North-Holland	Elsevier
Matrix Biology	0945-053X	-	American Society for Matrix Biology;International Society for Matrix Biology	Elsevier
Maturitas	0378-5122	-	European Menopause and Andropause Society (EMAS)	Elsevier
Mayo Clinic Proceedings	0025-6196	-	Mayo Clinic	Elsevier
Measurement	0263-2241	-	International Measurement Confederation (IMEKO)	Elsevier
Meat Science	0309-1740	-	American Meat Science Association	Elsevier
Mechanical Systems and Signal Processing	0888-3270	-	-	Elsevier
Mechanics of Materials	0167-6636	-	-	Elsevier
Mechanics Research Communications	0093-6413	-	CISM (International Centre for Mechanical Sciences)	Elsevier
Mechanism and Machine Theory	0094-114X	-	(IFToMM) International Federation for the Promotion of Mechanism and Machine Science	Elsevier
Mechanisms of Ageing and Development	0047-6374	-	-	Elsevier
Mechanisms of Development	0925-4773	-	International Society of Developmental Biologists	Elsevier
Mechatronics	0957-4158	-	International Federation of Automatic Control (IFAC)	Elsevier
MÃ©decine and Droit	1246-7391	-	-	Elsevier
MÃ©decine des Maladies MÃ©taboliques	1957-2557	-	Special Policy: 12 months	Elsevier
MÃ©decine du Sommeil	1769-4493	-	Special Policy: 12 months;SociÃ©tÃ© FranÃ§aise de Recherche et de MÃ©decine du Sommeil (SFRMS)	Elsevier
MÃ©decine et Maladies Infectieuses	0399-077X	-	SociÃ©tÃ© de Pathologie Infectieuse de Langue FranÃ§aise (SPILF)	Elsevier
MÃ©decine NuclÃ©aire - Imagerie Fonctionnelle et MÃ©tabolique	0928-1258	-	SociÃ©tÃ© FranÃ§aise de MÃ©decine NuclÃ©aire et d'Imagerie MolÃ©culaire (SFMN);CollÃ¨ge des Enseignants de Biophysique et de MÃ©decine NuclÃ©aire (CEBMN);Action ConcertÃ©e en MÃ©decine NuclÃ©aire du Sud de la France (ACOMEN);Association des MÃ©decins SpÃ©cialistes en MÃ©decine NuclÃ©aire du QuÃ©bec (AMSMNQ)	Elsevier
MÃ©decine Palliative	1636-6522	-	Special Policy: 12 months	Elsevier
Medical Clinics of North America	0025-7125	-	Special Policy: 12 months	Elsevier
Medical Dosimetry	0958-3947	-	American Association of Medical Dosimetrists	Elsevier
Medical Engineering and Physics	1350-4533	-	Institute of Physics and Engineering in Medicine (IPEM);Special Policy: 12 months	Elsevier
Medical Hypotheses	0306-9877	-	-	Elsevier
Medical Image Analysis	1361-8415	-	MICCAI Society	Elsevier
Medical Journal Armed Forces India	0377-1237	-	-	Elsevier
Medical Laser Application	1615-1615	-	Urban and Fischer	Elsevier
Medical Mycology Case Reports	2211-7539	2211-7539	International Society for Human and Animal Mycology (ISHAM)	Elsevier
Medicare Drug Reimbursement Guide	1558-5530	-	-	Elsevier
Medicina ClÃ­nica	0025-7753	1578-8989	Special Policy: 12 months	Elsevier
Medicine	1357-3039	-	Medicine Publishing	Elsevier
Membrane Technology	0958-2118	-	Elsevier Advanced Technology	Elsevier
Mendeleev Communications	0959-9436	1364-551X	Russian Academy of Sciences (RAS)	Elsevier
Mental Health and Physical Activity	1755-2966	-	-	Elsevier
Metabolic Engineering	1096-7176	-	Academic Press	Elsevier
Metabolism	0026-0495	-	Special Policy: 12 months	Elsevier
Metal Finishing	0026-0576	-	-	Elsevier
Metal Powder Report	0026-0657	-	-	Elsevier
Metamaterials	1873-1988	-	-	Elsevier
Methods	1046-2023	-	Academic Press	Elsevier
Methods in Cell Biology	0091-679X	-	Special Policy: Monograph Series	Elsevier
Methods in Enzymology	0076-6879	-	Special Policy: Monograph Series	Elsevier
Methods in Oceanography	2211-1220	-	-	Elsevier
MethodsX	-	2215-0161	Special Policy: Creative Commons Attribution	Elsevier
MÃ©tiers de la Petite Enfance	1258-780X	-	-	Elsevier
Minimal Invasive Chirurgie	0941-455X	-	Urban and Fischer	Elsevier
Microbes and Infection	1286-4579	-	Institut Pasteur	Elsevier
Microbial Pathogenesis	0882-4010	-	Academic Press	Elsevier
Microbiological Research	0944-5013	-	Urban and Fischer	Elsevier
Microbiology: Bacteriology, Mycology, Parasitology and Virology (Section 4 EMBASE)	0927-2771	-	-	Elsevier
Microchemical Journal	0026-265X	-	-	Elsevier
Microelectronic Engineering	0167-9317	-	-	Elsevier
Microelectronics Journal	0026-2692	-	-	Elsevier
Microelectronics Reliability	0026-2714	-	-	Elsevier
Micron	0968-4328	-	-	Elsevier
Microporous and Mesoporous Materials	1387-1811	-	International Zeolite Association	Elsevier
Microprocessors and Microsystems	0141-9331	-	-	Elsevier
microTAS Virtual Journal	-	-	-	Elsevier
Microvascular Research	0026-2862	-	Academic Press	Elsevier
Midwifery	0266-6138	1532-3099	Churchill Livingstone;Special Policy: 12 months	Elsevier
Mikrokosmos	0026-3680	-	Urban and Fischer	Elsevier
Minerals Engineering	0892-6875	-	-	Elsevier
Mining Science and Technology (China)	1674-5264	-	-	Elsevier
Mitochondrion	1567-7249	-	Mitochondria Research Society;Japanese Society of Mitochondria Research and Medicine	Elsevier
Molecular and Biochemical Parasitology	0166-6851	-	Special Policy: 12 months	Elsevier
Molecular and Cellular Endocrinology	0303-7207	-	Special Policy: 12 months	Elsevier
Molecular and Cellular Neuroscience	1044-7431	-	Academic Press;Special Policy: 12 months	Elsevier
Molecular and Cellular Probes	0890-8508	-	Special Policy: 12 months	Elsevier
Molecular Aspects of Medicine	0098-2997	-	International Union of Biochemistry and Molecular Biology (IUBMB);Special Policy: 12 months	Elsevier
Molecular Catalysis	2468-8231	-	-	Elsevier
Molecular Genetics and Metabolism	1096-7192	-	Society for Inherited Metabolic Disorders;Academic Press;Special Policy: 12 months	Elsevier
Molecular Immunology	0161-5890	-	Special Policy: 12 months	Elsevier
Molecular Metabolism	-	2212-8778	Special Policy: Creative Commons	Elsevier
Molecular Oncology	1574-7891	-	Wiley Open Access;Federation of European Biochemical Societies	Elsevier
Molecular Phylogenetics and Evolution	1055-7903	-	Academic Press;Special Policy: 12 months	Elsevier
Mondo Ortodontico	0391-2000	-	-	Elsevier
Multiple Sclerosis and Related Disorders	2211-0348	-	-	Elsevier
Mutation Research - Fundamental and Molecular Mechanisms of Mutagenesis	0027-5107	-	-	Elsevier
Mutation Research - Genetic Toxicology and Environmental Mutagenesis	1383-5718	-	Special Policy: 12 months	Elsevier
Mutation Research - Reviews	1383-5742	-	-	Elsevier
Mycological Research	0953-7562	-	British Mycological Society	Elsevier
Mycologist	0269-915X	-	British Mycological Society	Elsevier
Mycoscience	1340-3540	1618-2545	Mycological Society of Japan;Special Policy: 12 months	Elsevier
Nano Communication Networks	1878-7789	-	-	Elsevier
Nano Energy	2211-2855	-	-	Elsevier
Nano Today	1748-0132	-	-	Elsevier
Nanomedicine: Nanotechnology, Biology and Medicine	1549-9634	-	-	Elsevier
NDT and E International	0963-8695	-	-	Elsevier
Neoplasia	1522-8002	1476-5586	-	Elsevier
NÃ©phrologie and ThÃ©rapeutique	1769-7255	-	SociÃ©tÃ© de NÃ©phrologie PÃ©diatrique;SociÃ©tÃ© Francophone de Dialyse;SociÃ©tÃ© de NÃ©phrologie	Elsevier
Network Security	1353-4858	-	Elsevier Advanced Technology	Elsevier
Neural Networks	0893-6080	-	International Neural Network Society (INNS);European Neural Network Society (ENNS);Japanese Neural Network Society (JNNS)	Elsevier
Neurobiology of Aging	0197-4580	-	Special Policy: 12 months	Elsevier
Neurobiology of Disease	0969-9961	-	Academic Press;Special Policy: 12 months	Elsevier
Neurobiology of Learning and Memory	1074-7427	-	Special Policy: 12 months	Elsevier
Neurochemistry International	0197-0186	-	-	Elsevier
Neurochirurgie	0028-3770	-	SociÃ©tÃ© de Neurochirurgie de Langue FranÃ§aise;SociÃ©tÃ© FranÃ§aise de Neurochirurgie;Special Policy: 12 months	Elsevier
Neurocomputing	0925-2312	-	-	Elsevier
NeuroImage	1053-8119	-	Academic Press;Special Policy: Creative Commons Licenses	Elsevier
NeuroImage: Clinical	-	2213-1582	Special Policy: Creative Commons	Elsevier
Neuroimaging Clinics of North America	1052-5149	-	Special Policy: 12 months	Elsevier
NeurologÃ­a	0213-4853	1578-1968	Sociedad EspaÃ±ola de NeurologÃ­a (SEN);Special Policy: 12 months	Elsevier
NeurologÃ­a (English Edition)	2173-5808	-	Sociedad EspaÃ±ola de NeurologÃ­a (SEN);Special Policy: 12 months	Elsevier
NeurologÃ­a Argentina	1853-0028	-	Sociedad NeurolÃ³gica Argentina;Special Policy: 12 months	Elsevier
Neurologic Clinics	0733-8619	-	Special Policy: 12 months	Elsevier
Neurology and Neurosurgery	0014-4126	-	EMBASE	Elsevier
Neurology, Psychiatry and Brain Research	0941-9500	-	Urban and Fischer;Special Policy: 12 months	Elsevier
Neuromuscular Disorders	0960-8966	1873-2364	Special Policy: 12 months;World Muscle Society	Elsevier
Neuropeptides	0143-4179	-	-	Elsevier
Neuropharmacology	0028-3908	-	-	Elsevier
Neurophysiologie Clinique/Clinical Neurophysiology	0987-7053	-	SociÃ©tÃ© de Neurophysiologie Clinique de Langue FranÃ§aise	Elsevier
Neurophysiologie-Labor	1439-4847	-	Urban and Fischer	Elsevier
Neuropsychiatrie de l'Enfance et de l'Adolescence	0222-9617	-	SociÃ©tÃ© franÃ§aise de psychiatrie de l'enfant et de l'adolescent	Elsevier
Neuropsychologia	0028-3932	-	-	Elsevier
Neuroscience	0306-4522	-	Pergamon;Special Policy: 12 months	Elsevier
Neuroscience and Biobehavioral Reviews	0149-7634	-	International Behavioral Neuroscience Society	Elsevier
Neuroscience Letters	0304-3940	-	Special Policy: 12 months	Elsevier
Neuroscience Research	0168-0102	-	Japan Neuroscience Society;Special Policy: 12 months	Elsevier
Neurosurgery Clinics of North America	1042-3680	-	Special Policy: 12 months	Elsevier
Neurotherapeutics	1933-7213	1878-7479	American Society for Experimental NeuroTherapeutics;Springer Verlag (Germany)	Elsevier
NeuroToxicology	0161-813X	-	Special Policy: 12 months	Elsevier
Neurotoxicology and Teratology	0892-0362	-	Special Policy: 12 months;Neurobehavioral Teratology Society	Elsevier
New Astronomy	1384-1076	-	-	Elsevier
New Astronomy Reviews	1387-6473	-	North-Holland;Special Policy: 24 months	Elsevier
New Biotechnology	1871-6784	-	European Federation of Biotechnology	Elsevier
New Carbon Materials	1872-5805	-	-	Elsevier
New Ideas in Psychology	0732-118X	-	-	Elsevier
Nitric Oxide: Biology and Chemistry	1089-8603	-	Nitric Oxide Society;Academic Press	Elsevier
NJAS - Wageningen Journal of Life Sciences	1573-5214	-	Royal Netherlands Society for Agricultural Sciences (KLV)	Elsevier
nnales de Dermatologie et de VÃ©nÃ©rÃ©ologie	0151-9638	-	Association des Dermatologistes Francophones;SociÃ©tÃ© FranÃ§aise de Dermatologie;Special Policy: 12 months	Elsevier
Nonlinear Analysis: Hybrid Systems	1751-570X	-	-	Elsevier
Nonlinear Analysis: Real World Applications	1468-1218	-	-	Elsevier
Nonlinear Analysis: Theory, Methods and Applications	0362-546X	-	-	Elsevier
North American Journal of Economics and Finance	1062-9408	-	-	Elsevier
NPG Neurologie â€ Psychiatrie â€ GÃ©riatrie	1627-4830	-	Special Policy: 12 months	Elsevier
Nuclear Data Sheets	0090-3752	-	Academic Press	Elsevier
Nuclear Engineering and Design	0029-5493	-	European Nuclear Society (ENS);International Association for Structural Mechanics in Reactor Technology (IASMiRT)	Elsevier
Nuclear Instruments and Methods in Physics Research Section A: Accelerators, Spectrometers, Detectors and Associated Equipment	0168-9002	-	North-Holland	Elsevier
Nuclear Instruments and Methods in Physics Research Section B: Beam Interactions with Materials and Atoms	0168-583X	-	-	Elsevier
Nuclear Medicine (Section 23 EMBASE)	0014-4274	-	-	Elsevier
Nuclear Medicine and Biology	0969-8051	-	Society of Radiopharmaceutical Sciences	Elsevier
Nuclear Physics A	0375-9474	-	North-Holland	Elsevier
Nuclear Physics B	0550-3213	-	North-Holland;Special Policy: SCOAP3	Elsevier
Nuclear Physics B - Proceedings Supplements	0920-5632	-	-	Elsevier
Nurse Education in Practice	1471-5953	-	Churchill Livingstone	Elsevier
Nurse Education Today	0260-6917	-	Churchill Livingstone	Elsevier
Nurse Leader	1541-4612	-	American Organization of Nurse Executives;Mosby	Elsevier
Nursing	0212-5382	-	Special Policy: 12 months	Elsevier
Nursing Clinics of North America	0029-6465	-	Special Policy: 12 months	Elsevier
Nursing for Women's Health	1751-4851	1751-486X	Association of Women's Health, Obstetric and Neonatal Nurses (AWHONN);Special Policy: 12 months;Wiley	Elsevier
Nursing Outlook	0029-6554	-	American Academy of Nursing;Mosby	Elsevier
Nutrition	0899-9007	-	Special Policy: 12 months	Elsevier
Nutrition Clinique et MÃ©tabolisme	0985-0562	-	-	Elsevier
Nutrition, Metabolism and Cardiovascular Diseases	0939-4753	-	Italian Society of Human Nutrition;Italian Society for the Study of Atherosclerosis;Italian Society of Diabetology;Special Policy: 12 months	Elsevier
Nutrition Research	0271-5317	-	Special Policy: 12 months	Elsevier
Obesity Research and Clinical Practice	1871-403X	-	-	Elsevier
Obstetrics and Gynecology (Section 10 EMBASE)	0014-4142	-	-	Elsevier
Obstetrics and Gynecology Clinics of North America	0889-8545	-	Special Policy: 12 months	Elsevier
Obstetrics, Gynaecology and Reproductive Medicine	1751-7214	-	Medicine Publishing	Elsevier
Occupational Health and Industrial Medicine (Section 35 EMBASE)	0014-4398	-	-	Elsevier
Ocean and Coastal Management	0964-5691	-	-	Elsevier
Ocean Engineering	0029-8018	-	-	Elsevier
Ocean Modelling	1463-5003	-	-	Elsevier
Oceanographic Literature Review	0967-0653	-	-	Elsevier
Ocular Surface	1542-0124	-	-	Elsevier
Omega	0305-0483	-	-	Elsevier
One Health	-	2352-7714	Special Policy: Creative Commons Attribution Non-Commercial No-Derivatives License	Elsevier
Online Social Networks and Media	-	2468-6964	Special Policy: 24 months	Elsevier
Operations Research for Health Care	2211-6923	-	-	Elsevier
Operations Research Letters	0167-6377	-	-	Elsevier
Operative Techniques in General Surgery	1524-153X	-	-	Elsevier
Operative Techniques in Orthopaedics	1048-6666	-	Special Policy: 12 months	Elsevier
Operative Techniques in Otolaryngology - Head and Neck Surgery	1043-1810	-	Special Policy: 12 months	Elsevier
Operative Techniques in Sports Medicine	1060-1872	-	Special Policy: 12 months	Elsevier
Operative Techniques in Thoracic and Cardiovascular Surgery	1522-2942	-	American Association for Thoracic Surgery;Special Policy: 12 months	Elsevier
Ophthalmology (Section 12 EMBASE)	0014-4169	-	EMBASE	Elsevier
Ophthalmology: Journal of The American Academy of Ophthalmology	0161-6420	-	American Academy of Ophthalmology;Special Policy: 12 months	Elsevier
Optical Fiber Technology	1068-5200	-	Academic Press	Elsevier
Optical Materials	0925-3467	-	North-Holland	Elsevier
Optical Switching and Networking	1573-4277	-	-	Elsevier
Optics and Laser Technology	0030-3992	-	-	Elsevier
Optics and Lasers in Engineering	0143-8166	-	-	Elsevier
Optics Communications	0030-4018	-	North-Holland	Elsevier
Optik	0030-4026	-	Urban and Fischer	Elsevier
Option/Bio	0992-5945	-	Special Policy: 12 months	Elsevier
Opto-Electronics Review	1230-3402	1896-3757	Versita	Elsevier
Optometry - Journal of the American Optometric Association	1529-1839	-	American Optometric Association	Elsevier
Oral and Maxillofacial Surgery Clinics of North America	1042-3699	-	Special Policy: 12 months	Elsevier
Oral Oncology	1368-8375	-	European Association of Oral Medicine, International Association of Oral Pathologists;International Academy of Oral Oncology;Special Policy: 12 months	Elsevier
Oral Science International	1348-8643	-	Japanese Stomatological Society;Special Policy: 12 months	Elsevier
Oral Surgery, Oral Medicine, Oral Pathology and Oral Radiology	2212-4403	-	American Academy of Oral and Maxillofacial Pathology;American Academy of Oral Medicine;American Academy of Oral and Maxillofacial Radiology;American College of Oral and Maxillofacial Surgery;Special Policy: 12 months	Elsevier
Oral Surgery, Oral Medicine, Oral Pathology, Oral Radiology and Endodontology	1079-2104	-	Organization of Teachers of Oral Diagnosis;American Academy of Oral and Maxillofacial Pathology;American Academy of Oral Medicine;American Academy of Oral and Maxillofacial Radiology;American College of Oral and Maxillofacial Surgery;Mosby	Elsevier
Orbis	0030-4387	-	Foreign Policy Research Institute	Elsevier
Ore Geology Reviews	0169-1368	-	-	Elsevier
Organic Electronics	1566-1199	-	North-Holland	Elsevier
Organic Geochemistry	0146-6380	-	European Association of Organic Geochemists	Elsevier
Organisms Diversity and Evolution	1439-6092	1618-1077	Gesellschaft fÃ¼r Biologische Systematik (GfBS);Urban and Fischer	Elsevier
Organizational Behavior and Human Decision Processes	0749-5978	-	-	Elsevier
Organizational Dynamics	0090-2616	-	-	Elsevier
Orthodontic Waves	1344-0241	-	Japanese Orthodontic Society	Elsevier
Orthopaedics and Trauma	1877-1327	-	Medicine Publishing	Elsevier
Orthopedic Clinics of North America	0030-5898	-	Special Policy: 12 months	Elsevier
Orthopedic Surgery (Section 33 EMBASE)	0014-4371	-	EMBASE	Elsevier
Osong Public Health and Research Perspectives	2210-9099	-	Korea Centers for Disease Control and Prevention	Elsevier
Osteoarthritis and Cartilage	1063-4584	-	OsteoArthritis Research Society International;Special Policy: 12 months	Elsevier
Osteopathic Family Physician	1877-573X	-	American College of Osteopathic Family Physicians	Elsevier
Osteopathische Medizin	1615-9071	-	Urban and Fischer	Elsevier
Otolaryngologia Polska	0030-6657	-	Polish Otorhinlaryngology - Head and Neck Surgery Society;Urban and Partner	Elsevier
Otolaryngologic Clinics of North America	0030-6665	-	Special Policy: 12 months	Elsevier
Otorhinolaryngology (Section 11 EMBASE)	0014-4150	-	EMBASE	Elsevier
Pacific-Basin Finance Journal	0927-538X	-	-	Elsevier
Paediatric Respiratory Reviews	1526-0542	-	-	Elsevier
Paediatrics and Child Health	1751-7222	-	Medicine Publishing	Elsevier
PAIN	0304-3959	1872-6623	International Association for the Study of Pain;Lippincott, Williams & Wilkins	Elsevier
Pain Management Nursing	1524-9042	-	American Society for Pain Management Nursing;Special Policy: 12 months	Elsevier
Palaeogeography, Palaeoclimatology, Palaeoecology	0031-0182	-	-	Elsevier
Palaeoworld	1871-174X	-	Chinese Academy of Sciences (CAS), Nanjing Institute of Geology and Palaeontology	Elsevier
Pancreatology	1424-3903	-	International Association of Pancreatology (IAP);European Pancreatic Club (EPC)	Elsevier
Parallel Computing	0167-8191	-	North-Holland	Elsevier
Parasitology International	1383-5769	-	Japanese Society of Parasitology	Elsevier
Parkinsonism and Related Disorders	1353-8020	-	World Federation of Neurology Research Group on Parkinsonism and Related Disorders	Elsevier
Particuology	1674-2001	-	Science Press;Chinese Academy of Sciences, Institute of Process Engineering;Chinese Society of Particuology	Elsevier
Pathologie Biologie	0369-8114	-	-	Elsevier
Pathology - Research and Practice	0344-0338	-	Urban and Fischer	Elsevier
Pathophysiology	0928-4680	-	International Society for Pathophysiology	Elsevier
Patient Education and Counseling	0738-3991	-	European Association for Communication in Healthcare (EACH);American Academy on Communication in Healthcare (AACH);Special Policy: 12 months	Elsevier
Pattern Recognition	0031-3203	-	Pattern Recognition Society	Elsevier
Pattern Recognition Letters	0167-8655	1872-7344	International Association for Pattern Recognition;North-Holland	Elsevier
Pediatria Polska	0031-3939	-	Polish Pediatric Society;Urban and Partner	Elsevier
Pediatric Clinics of North America	0031-3955	-	Special Policy: 12 months	Elsevier
Pediatric Neurology	0887-8994	-	Special Policy: 12 months	Elsevier
Pediatric News	0031-398X	-	International Medical News Group	Elsevier
Pediatrics and Neonatology	1875-9572	-	-	Elsevier
[truncated: 588 more rows]

## Sheet: ElsevierSample
Journal Title	ISSN	ISSN	Elsevier Notes	Publisher	Embargo	APC	More APC	Waive APC	Random #	# Used	Notes
Best Practice and Research: Clinical Rheumatology	1521-6942	-	Special Policy: 12 months	Elsevier	12	2650			289
Journal of Quantitative Spectroscopy and Radiative Transfer	0022-4073	-	Pergamon	Elsevier	24	2590			1584
Progress in Neuro-Psychopharmacology and Biological Psychiatry	0278-5846	-	Special Policy: 12 months	Elsevier	12	2400			2116	2115
Comparative Biochemistry and Physiology - Part B: Biochemistry and Molecular Biology	1096-4959	-	Special Policy: 12 months	Elsevier	12	3000			532	529
International Review of Economics Education	-	1477-3880	-	Elsevier	24	2750			1213
Socio-Economic Planning Sciences	0038-0121	-	-	Elsevier	24	2690			2343	2342
Journal of Economic Behavior and Organization	0167-2681	-	-	Elsevier	36	2450	125 sbmsn	not clear	1374
Journal of Purchasing and Supply Management	1478-4092	-	-	Elsevier	24	2000			1582
Research in Social Stratification and Mobility	0276-5624	-	ISA Research Committee 28 on Social Stratification and Social	Elsevier	24	1300			2194
Physical Medicine and Rehabilitation Clinics of North America	1047-9651	-	Special Policy: 12 months	Elsevier	12	3000			2031
Evolution and Human Behavior	1090-5138	-	Human Behavior and Evolution Society	Elsevier	12	3000			898	896
Indian Heart Journal	0019-4832	-	Cardiological Society of India	Elsevier	0	0			1088	1087	DOAJ Article Metadata
Journal of Pediatric Nursing	0882-5963	-	Society of Pediatric Nurses;Pediatric Endocrinology Nursing Society (PENS);Special Policy: 12 months	Elsevier	12	2740			1550
Biophysical Journal	3495-06-01	1542-0086	Biophysical Society;Special Policy: 12 month embargo	Cell Press	12	2500	Page charges (average $90 per page first 12; then average $160 per page); figures average $450 per figure; page fees still assessed but discounted for OA articles	page but not figure	2		Waivable page fees, no waiver figures
Applied Ocean Research	0141-1187	-	-	Elsevier	24	2950	Data for $600; MethodsX for another fee; color artwork charged for print only		199
Clinica Chimica Acta	8981-09-01	-	Special Policy: 12 months	Elsevier	12	3200			448	447
EBioMedicine	-	2352-3964	Special Policy: Creative Commons	Elsevier	0	3500			733		DOAJ Article Metadata
Engineering Fracture Mechanics	0013-7944	-	European Structural Integrity Society	Elsevier	24	2650			828
HPB	1365-182X	1477-2574	International Hepato-Pancreato-Biliary Association (IHPBA);American Hepato-Pancreato-Biliary Association (AHPBA);European Hepato-Pancreato-Biliary Association (EHPBA);Special Policy: 12 months	Elsevier	12	3000			1058
Applied Geochemistry	0883-2927	-	International Association of GeoChemistry	Elsevier	24	2750			192
Fungal Ecology	1754-5048	-	-	Elsevier	12	3000	Data for $600; extra for color figures in print (cost not specified)		969		"If, together with your accepted article, you submit usable color figures then Elsevier will ensure, at no additional charge, that these figures will appear in color online (e.g., ScienceDirect and other sites) regardless of whether or not these illustrations are reproduced in color in the printed version. For color reproduction in print, you will receive information regarding the costs from Else…
Thin-Walled Structures	0263-8231	-	-	Elsevier	24	3230			2438
Food and Chemical Toxicology	0278-6915	-	Pergamon;Special Policy: 12 months	Elsevier	12	3590	Data for $600; MethodsX for another fee; color artwork charged for print only		935		https://www.elsevier.com/journals/food-and-chemical-toxicology/0278-6915/guide-for-authors
Journal of Cranio-Maxillofacial Surgery	1010-5182	-	European Association for Cranio-Maxillofacial Surgery	Elsevier	12	3300	color artwork fee in print		1355		https://www.elsevier.com/journals/food-and-chemical-toxicology/0278-6915/guide-for-authors
Business Horizons	6813-07-01	-	Special Policy: 36 months;Indiana University, Kelley School of Business	Elsevier	36	1800			365	361
Vacuum	0042-207X	-	-	Elsevier	24	2200			2514		https://www.sciencedirect.com/science/article/abs/pii/S0042207X20303523; https://www.sciencedirect.com/science/article/abs/pii/S0042207X20303626#!
Acta Materialia	1359-6454	-	Acta Materialia Inc;Pergamon	Elsevier	24	3000	Data for $600; extra for color figures in print (cost not specified)		57
Journal of Pharmaceutical Analysis	2095-1779	-	Xi'an Jiaotong University	Elsevier	0	0			1557		DOAJ; https://www.sciencedirect.com/science/article/pii/S2095177919309876#!; https://www.sciencedirect.com/science/article/pii/S2095177920302264; https://www.sciencedirect.com/science/article/abs/pii/S0042207X20303663#!
International Journal of Human-Computer Studies	1071-5819	-	Academic Press	Elsevier	24	3250			1166
Construction and Building Materials	0950-0618	-	-	Elsevier	24	3040			591
If needed:
Neurochemistry International	0197-0186	-	-	Elsevier	12	2050			1863
Neuroimaging Clinics of North America	1052-5149	-	Special Policy: 12 months	Elsevier	12	2840			1870	1868
				Median	18	2750
				Average	17.6	2584.33

## Sheet: ElsevierSCORE
ELSEVIER	Score	Evidence/Statement	Source1	Date1	Source2	Date2	Notes
1/PUBLIC ACCESS	0	Average 18 months; Median 18 months	Sample
2/APCs	0	Average $2584; Median $2750	Sample
3/COPYRIGHT	0	Copyright agreements are NOT the same across titles; "Author's post-print must be released with a Creative Commons Attribution Non-Commercial No Derivatives License"	http://sherpa.ac.uk/romeo/issn/0950-0618/	2020-06-21	https://v2.sherpa.ac.uk/id/publication/13693	2020-06-21
4/AUTHOR USE	2	"Authors can use their articles, in full or in part, for a wide range of scholarly, non-commercial purposes as outlined below:"	https://www.elsevier.com/about/policies/copyright	2020-06-21			Not every noncommercial use is listed/allowed (what about MOOCs)? But giving higher score here because educational use is "0"
5/EDUCATIONAL USE	0	(NOT MOOCS) "Use by the author's institution for classroom teaching at the institution and for internal training purposes (including distribution of copies, paper or electronic, and use in coursepacks and courseware programs, but not in Massive Open Online Courses)"	https://www.elsevier.com/about/policies/copyright	2020-06-21			NOT MOOCS
TOTAL 1-5	2
6a/NPO not tied to higher ed (4)	0
6/b NPO in higher ed (3)	0
6/c NPO alone (2)	0
6/d Faculty owned (1)	0
6/e OER (1)	0
6/BUSINESS MODEL	0
7a/Recognized metadata schema (3)	3	"On this page we make a metadata package available to our readers, which extracts metadata from a journal article or a book chapter and writes them as RDF data."	https://www.elsevier.com/authors/author-schemas/metadata-for-xml-articles-and-chapters	2020-06-22			Available as RDF but not in RDF
7b/Metadata is OA (3)	0	"ScienceDirect subscribers are granted full access to ScienceDirect APIs. If you do not have a ScienceDirect subscription, you can still use our APIs; however, you will have limited access to basic metadata and basic search functionality, yet full access to all open access content."	https://www.elsevier.com/solutions/sciencedirect/support/api	2020-06-22	https://www.elsevier.com/about/policies/text-and-data-mining	2020-06-22
7c/Permanent identifier (DOI) (3)	3	Present on all recent articles	Sample
7d/Rich metadata (e.g., IP metadata) (2)
7e/DOAJ or PMC metadata contributions (2)	0	Not for all titles					OA in DOAJ but the rest is not; same with PMC
7/DISCOVERABILITY	6
8a/Accessibility
8b/No mirror journals (4)	0		https://www.elsevier.com/about/open-science/open-access/open-access-journals/mirror-journals	2020-06-22
8c/No lobbying against OA policies (4)	0		Literature Review
8d/No mass editorial resignations (4)	0		Literature Review
8e/No Non-Disclosure Agreements (4)	0		Literature Review
8f/Free text mining for scholars (3)	0	"We have adopted a license–based approach which automatically enables researchers at subscribing institutions to text mine for non-commercial research purposes and to gain access to full text content in XML for this purpose"	https://www.elsevier.com/about/policies/text-and-data-mining	2020-06-22	https://www.elsevier.com/solutions/scopus/how-scopus-works/high-quality-data	2020-06-22
8/BUSINESS PRACTICES	0
9a/Member of COPE (5)	5		https://publicationethics.org/category/publisher/elsevier	2020-06-22
9b/Waives APCs (4)	4	"In addition, if an author (or group of authors) from a non-Research4life country cannot afford the APC to publish Gold Open Access in a Gold Open Access journal, we will consider individual waiver requests on a case-by-case basis."	https://www.elsevier.com/about/policies/pricing	2020-06-22
9c/Table or Illus rights statements (3)
9d/Author reuse of table or illus (3)	3	and for non-authors, STM Permission Guidelines signatory	https://www.elsevier.com/about/policies/copyright	2020-06-22	https://www.stm-assoc.org/intellectual-property/permissions/permissions-guidelines/	2020-06-22
9e/ETD Permissions (3)	3	"Elsevier does not view the following uses of a work as prior publication: publication in the form of an abstract; publication as an academic thesis; publication as an electronic preprint. Note: some society-owned titles and journals that operate double-blind review have different policies on prior publication. Information on prior publication is included within each Elsevier journal’s guide for …	https://www.elsevier.com/authors/journal-authors/policies-and-ethics	2020-06-21	https://www.elsevier.com/about/policies/copyright/permissions	2020-06-22	Exceptions for some society journals
9f/ Preservation (3)	3	CLOCKSS	https://www.elsevier.com/about/policies/digital-archive	2020-06-22
9g/ Color image charges (3)	0	color image charges for print only in subset of sample for unspecified fee
9h/ Submission Fee <$150 (3)	3	only one in sample
9i/ ORCIDs for Authors (2)	0	"View the author's ORCID record" optional on some; all have Mendeley records; no ORCIDs identified on bib pages	see links here and in sample				https://www.sciencedirect.com/science/article/pii/S1532046410000195#!; https://www.sciencedirect.com/science/article/abs/pii/S0042207X20303584#!
9j/ Pre-prints allowed (2)	2	"Authors can share their preprint anywhere at any time."	https://www.elsevier.com/about/policies/sharing	2020-06-21			Exceptions for some society journals
9/ PUBLISHING PRACTICES	23
TOTAL 1-9	31

## Sheet: eScholAll
Aleph, UCLA Undergraduate Research Journal for the Humanities and Social Sciences
Asian Pacific American Law Journal
BackBone
Berkeley Journal of Middle Eastern & Islamic Law
Berkeley Papers in Formal Linguistics
Berkeley Planning Journal
Berkeley Review of Education	Grad Students
Berkeley Scientific Journal
Berkeley Undergraduate Journal
Berkeley Undergraduate Journal of Classics
Biogeographia – The Journal of Integrative Biogeography
California Agriculture
California Italian Studies
California Journal of Politics and Policy
Carte Italiane
Chicana/o Latina/o Law Review
Clinical Practice and Cases in Emergency Medicine
Cliodynamics
Critical Planning
Dance Major Journal
Dermatology Online Journal
Diagonal: An Ibero-American Music Review
Dotawo: A Journal of Nubian Studies
Electronic Green Journal
Frontiers of Biogeography
Global Societies Journal
HAUNT Journal of Art
Himalayan Linguistics
InterActions: UCLA Journal of Education and Information Studies
International Journal of Comparative Psychology
International Symposium on Stratified Flows
Journal for Learning through the Arts
Journal of Astronomy in Culture
Journal of California and Great Basin Anthropology
Journal of Citrus Pathology
Journal of Critical Mixed Race Studies
Journal of Education and Teaching in Emergency Medicine
Journal of Evolution and Health: A joint publication of the Ancestral Health Society and the Society for Evolutionary Medicine and Health
Journal of Islamic and Near Eastern Law
Journal of Law and Political Economy
Journal of Transnational American Studies
L2 Journal
Languages of the Caucasus
Lucero
Mediterranean Journal of Emergency Medicine & Acute Care
Mester
National Black Law Journal
New German Review: A Journal of Germanic Studies
nineteen sixty nine: an ethnic studies journal
Nutrition Bytes
Pacific Basin Law Journal
PaleoBios
Parks Stewardship Forum
Paroles gelées
Proceedings of the Annual Meeting of the Berkeley Linguistics Society
Proceedings of the Vertebrate Pest Conference
Queer Cats Journal of LGBTQ Studies
Race and Yoga
Refract: An Open Access Visual Studies Journal	Grad Students
Regeneración Tlacuilolli: UCLA Raza Studies Journal
rEvista: A Multi-media, Multi-genre e-Journal for Social Justice
Room One Thousand
San Francisco Estuary and Watershed Science
Streetnotes
Structure and Dynamics
Technology Innovations in Statistics Education
Territories: A Trans-Cultural Journal of Regional Studies
The Equilibrium
The Indigenous Peoples’ Journal of Law, Culture & Resistance
The Undergraduate Historical Journal at UC Merced
The Vernal Pool
TRANSIT
Translation Studies Journal
TRANSMODERNITY: Journal of Peripheral Cultural Production of the Luso-Hispanic World
UC Berkeley PhonLab Annual Report
UC Merced Undergraduate Research Journal
UC Riverside Undergraduate Research Journal
UCLA Criminal Justice Law Review
UCLA Entertainment Law Review
UCLA Historical Journal
UCLA Journal of Environmental Law and Policy
UCLA Women's Law Journal
Ufahamu: A Journal of African Studies
Western Journal of Emergency Medicine: Integrating Emergency Care with Population Health
World Cultures eJournal

## Sheet: eScholSample
Journal Title	ISSN	ISSN	Pub Partner	Embargo	APC	More APC	Waive APC	ORCID	License	Copyright	DOAJ	DOAJ Article Uploads	Random #	# Used	Notes
TRANSMODERNITY: Journal of Peripheral Cultural Production of the Luso-Hispanic World	2154-1353	2154-1361		OA	0			No	CC BY		https://doaj.org/toc/2154-1361	ND	74
Cliodynamics	2373-7530			OA	0			No	CC BY		https://doaj.org/toc/2373-7530	2019	18
Mediterranean Journal of Emergency Medicine & Acute Care	2642-7168	2642-7184		OA	0			No	CC BY		no		45
UCLA Women's Law Journal	1943-1708			OA	0				© Authors		no		82		Law
Himalayan Linguistics	1544-7502			OA	0				CC BY NC ND	© Authors	https://doaj.org/toc/1544-7502	ND	28
Electronic Green Journal	1076-7975			OA	0				CC BY		https://doaj.org/toc/1076-7975	ND	24
Biogeographia – The Journal of Integrative Biogeography	1594-7629	2475-5257		OA	0				CC BY		https://doaj.org/toc/2475-5257	2018	11
Western Journal of Emergency Medicine: Integrating Emergency Care with Population Health	1936-900X	1936-9018		OA	1000		"WestJEM will waive the article processing fee after the article has been accepted for articles in which the first author comes from a low income or lower middle income countries." (http://westjem.com/article-processing-fee)	No	CC BY		https://doaj.org/toc/1936-9018	2020	84
UCLA Entertainment Law Review	1939-5523			OA	0				© Authors		no		79		Law
BackBone				OA	0				CC BY NC	© Authors	no		4	3
Clinical Practice and Cases in Emergency Medicine	2474-252X			OA	1000	500-1000	"CPC EM is willing to waive the article processing fee after the article has been accepted for authors who come from low income or lower middle income countries on a case by case basis." (https://escholarship.org/uc/uciem_cpcem/apc)	No	CC BY		https://doaj.org/toc/2474-252X	2020	17
Structure and Dynamics	1554-3374			OA	0			No	CC BY		no		65
Parks Stewardship Forum	2688-187X			OA	100		"this fee is waived if the author or any of the co-authors is a GWS member or a faculty member at any branch of the University of California system, and may be waived on a needs basis" https://escholarship.org/uc/psf/submissionGuidelines	No	CC BY NC	© Authors	no		53
Race and Yoga	2576-1307			OA	0				CC BY NC ND	© Authors	no		59	58
Frontiers of Biogeography	1948-6596			OA	300	Page Fees	"Following acceptance of an article for publication, the corresponding author will be sent an invoice for the relevant sum. Our policy is, in effect, a pay if you can model. Those who have access to funds to offset publication page charges are requested to pay and those who do not can decline by sending an email in response to the invoice, sent to the Editorial Office. This policy is in effect un…	No	CC BY		https://doaj.org/toc/1948-6596	2019	27	25	EER CONNECTION
International Journal of Comparative Psychology	0889-3667	2168-3344		OA	0				CC BY		https://doaj.org/toc/2168-3344	ND	31	30
California Agriculture	0008-0845	2160-8091		OA	10	$10 Submission Fee	N/A		CC BY NC ND	© Authors	https://doaj.org/toc/2160-8091	2020	19	12
Ufahamu: A Journal of African Studies	0041-5715	2150-5802		OA	0				© Authors		no		80	83
Berkeley Papers in Formal Linguistics				OA	0				unclear		no		6	5
Dermatology Online Journal	1087-2108			OA	0				CC BY NC ND	© Authors	https://doaj.org/toc/1087-2108	ND	20	21
San Francisco Estuary and Watershed Science	1546-2366			OA	0			No	CC BY		https://doaj.org/toc/1546-2366	2017	60	63
Journal for Learning through the Arts	1932-7528			OA	0				© Authors		https://doaj.org/toc/1932-7528	ND	32
Journal of Citrus Pathology	2313-5131			OA	0			No	CC BY		no		35
Translation Studies Journal	1555-8614	2373-8200		OA	0						no		73
				Median:	0						13 of 23	7 of 23
				Average:	104.783
																	35

## Sheet: eScholSCORE
eScholarship (UC)	Score	Evidence/Statement	Source1	Date1	Source2	Date2	Notes
1/PUBLIC ACCESS	4	Publisher a Member of OASPA	https://oaspa.org/member/california-digital-library/	2020-06-22	Sample
2/APCs	4		Sample
3/COPYRIGHT	1	Several CC BY-NC-ND	Sample
4/AUTHOR USE	3	By licenses in sample, all allow authors to retain reuse rights, or give users these rights.	Sample
5/EDUCATIONAL USE	2	The © Authors journals don't give explicit educational use permissions.	Sample
TOTAL 1-5	14
6a/NPO not tied to higher ed (4)	0
6/b NPO in higher ed (3)	3
6/c NPO alone (2)	0
6/d Faculty owned (1)	0
6/e OER (1)	0
6/BUSINESS MODEL	3
7a/Recognized metadata schema (3)	3	based on OJS; XML; can be written to many	https://help.escholarship.org/support/solutions/articles/9000134074-escholarship-technical-infrastructure	2020-06-23
7b/Metadata is OA (3)	3	API for all and OAI-PMH	https://help.escholarship.org/support/solutions/articles/9000147730-escholarship-api	2020-06-23	https://help.escholarship.org/support/solutions/articles/9000133474-using-the-oai-pmh-interface	2020-06-23
7c/Permanent identifier (DOI) (3)	3	ARKs for all and DOIs optional	https://help.escholarship.org/support/solutions/articles/9000133472-what-persistent-identifiers-does-escholarship-use-doi-ark-	2020-06-23
7d/Rich metadata (e.g., IP metadata) (2)
7e/DOAJ or PMC metadata contributions (2)	0	Not all journals. Majority of journals (13/23) are listed in DOAJ but only 7 of 13 currently upload article metadata to DOAJ (staffing concerns for those that aren't?)	https://help.escholarship.org/support/solutions/articles/9000127352-directory-of-open-access-journals-	2020-06-24	DOAJ pages for each journal title	doaj.org	UC Lib will help with DOAJ application at journal request: "We are happy to consult with journal editors about whether their journals are eligible for inclusion in the DOAJ. We are also happy to apply directly on your behalf."
7/DISCOVERABILITY	9
8a/Accessibility
8b/No mirror journals (4)	4	All OA journals already
8c/No lobbying against OA policies (4)	4	Policies reflect the opposite; All OA journals
8d/No mass editorial resignations (4)	4		Literature Review
8e/No Non-Disclosure Agreements (4)	4	No subscriptions or license agreements with institutions
8f/Free text mining for scholars (3)	3	"Text mining is also often fair use. You are welcome to use eScholarship content for text mining via our public API, so long as you respect our Code of Conduct and don’t redistribute the content in a way that infringes copyright. Read more at the UC Berkeley Library’s guide to copyright and text mining."	https://escholarship.org/terms	2020-06-23
8/BUSINESS PRACTICES	19
9a/Member of COPE (5)	0		COPE Member list as of	2020-06-27
9b/Waives APCs (4)	4		Sample
9c/Table or Illus rights statements (3)
9d/Author reuse of table or illus (3)	3	By licenses in sample, all allow authors to retain reuse rights, or give users these rights.	Sample
9e/ETD Permissions (3)	3	By licenses in sample, all allow authors to retain reuse rights, or give users these rights.
9f/ Preservation (3)	3	UC's Merritt Archive; CLOCKSS	https://help.escholarship.org/support/solutions/articles/9000133470-what-digital-archiving-does-escholarship-use-	2020-06-24	https://clockss.org/community/participating-publishers/	2020-06-27
9g/ Color image charges (3)	3		Sample
9h/ Submission Fee <$150 (3)	3	Only one has submission fee, of $10 (yes, ten)	Sample
9i/ ORCIDs for Authors (2)	0	No recent articles with ORCIDs	Sample
9j/ Pre-prints allowed (2)	2	Few mentions in policies, but S&D and Clio okay with them	Sample
9/ PUBLISHING PRACTICES	21
TOTAL 1-9	66

## Sheet: EvEcolResSCORE
Evolutionary Ecology Research (Evolutionary Ecology, Ltd.)	Score	Evidence/Statement	Source1	Date1	Source2	Date2	Notes
1/PUBLIC ACCESS	1	"Authors keep their copyright but give EER the exclusive right to distribute their paper for one year. Authors also agree not to charge for non-commercial use of their work by educational and research institutions. "	http://www.evolutionary-ecology.com/advice/AdviceFrames.html	2020-06-27
2/APCs	3	Publication Fee $1000 or be from a subscribing instituion or subscribe yourself; "Upon acceptance of an article for publication, EER will require a publication fee of $1000 USD per article. All circumstances justifying a waiver are listed above. $1000 USD is approximately equal to EER's cost to publish an article. (Notice that the annual cost of a one-year Internet subscription to EER is much che…	http://www.evolutionary-ecology.com/advice/AdviceFrames.html	2020-06-27
3/COPYRIGHT	3	Authors hold copyright; License to EER for 12 months "	same
4/AUTHOR USE	3	Authors are copyright holders	same
5/EDUCATIONAL USE	2	same
TOTAL 1-5	12
6a/NPO not tied to higher ed (4)
6/b NPO in higher ed (3)
6/c NPO alone (2)
6/d Faculty owned (1)	1		http://www.evolutionary-ecology.com/subscriptions.html	2020-06-27	www.evolutionary-ecology.com/elicense.html	2020-06-27
6/e OER (1)
6/BUSINESS MODEL	1
7a/Recognized metadata schema (3)	0	unclear
7b/Metadata is OA (3)	0	unclear
7c/Permanent identifier (DOI) (3)	0	no recent articles with DOIs
7d/Rich metadata (e.g., IP metadata) (2)
7e/DOAJ or PMC metadata contributions (2)	0
7/DISCOVERABILITY	0
8a/Accessibility
8b/No mirror journals (4)	4	only one journal	Literature Review
8c/No lobbying against OA policies (4)	4		Literature Review
8d/No mass editorial resignations (4)	4		Literature Review
8e/No Non-Disclosure Agreements (4)	4	Costs listed on page	http://www.evolutionary-ecology.com/subscriptions.html	2020-06-27
8f/Free text mining for scholars (3)	3	unclear; probably supported if possible; full-text searching suggests it might be possible	http://www.evolutionary-ecology.com/search.php	2020-06-27
8/BUSINESS PRACTICES	19
9a/Member of COPE (5)	0	Not listed in COPE member list		2020-06-27
9b/Waives APCs (4)	4	"EER will continue its policy of free publication in any and all of the following circumstances: IF the institutional library* of the first author subscribes. (Cooperating community waiver) OR if the institutional library of the first author is NOT on the official World Bank List of high income countries. (Less-than-rich-nation waiver) OR if the first author works at an institution whose scientis…	http://www.evolutionary-ecology.com/advice/AdviceFrames.html	2020-06-27
9c/Table or Illus rights statements (3)
9d/Author reuse of table or illus (3)	3	Authors are copyright holders
9e/ETD Permissions (3)	3	Authors are copyright holders
9f/ Preservation (3)	0	unclear (not listed in CLOCKSS or LOCKSS)		2020-06-27
9g/ Color image charges (3)	0	"Throughout its first seven volumes, EER processed and published most articles for free, assessing authors only for occasional color illustrations in our hard-copy edition. "	http://www.evolutionary-ecology.com/advice/AdviceFrames.html	2020-06-27
9h/ Submission Fee <$150 (3)	3	No submission fee	http://www.evolutionary-ecology.com/advice/AdviceFrames.html	2020-06-27
9i/ ORCIDs for Authors (2)	0	No recent articles with ORCIDs
9j/ Pre-prints allowed (2)	0	unclear
9/ PUBLISHING PRACTICES	13
TOTAL 1-9	45

## Sheet: SocNeuroAll
	ISSN	ISSN	Embargo	APC	Waive APC	Publishing Fee	Submission Fee	Waive Pub/Smsn Fee	Fee Notes	Copyright
Journal of Neuroscience				3210	N/A	2185	140	yes only pub fee generally	Pub Fee $1535 for members	with authors, then 6 months to CC BY
eNeuro				2875				reduced, not waived	APC less for non-research articles and for members
				3042.5
				3042.5

## Sheet: SocNeuroSCORE
Society for Neuroscience	Score	Evidence/Statement	Source1	Date1	Source2	Date2	Notes
1/PUBLIC ACCESS	3	"JNeurosci automatically deposits all articles in PubMed Central regardless of funding status. Articles are deposited once they have appeared in an issue and will be freely available 6 months from the issue date, unless the authors selected Open Choice. Furthermore, authors may deposit their final, accepted manuscript file, including revisions made during peer review, to funder, institutional, or…	https://www.jneurosci.org/content/rights-permissions	2020-06-27	https://www.jneurosci.org/content/28/16/4109	2020-06-27	OA journal is in DOAJ
2/APCs	0	Considering only research articles, average for non-members is over $3000
3/COPYRIGHT	3	Copyright of all material published in JNeurosci remains with the authors. The authors grant SfN an exclusive license to publish their work for the first 6 months. After 6 months the work becomes available to the public to copy, distribute, or display under a Creative Commons Attribution 4.0 International (CC BY 4.0) license.	https://www.jneurosci.org/content/information-authors#fees	2020-06-27	https://www.eneuro.org/content/general-information#policies	2020-06-27
4/AUTHOR USE	3	CC BY license (after 6 months for JN)
5/EDUCATIONAL USE	3	CC BY license (after 6 months for JN)
TOTAL 1-5	12
6a/NPO not tied to higher ed (4)	4
6/b NPO in higher ed (3)	0
6/c NPO alone (2)	0
6/d Faculty owned (1)	0
6/e OER (1)	0
6/BUSINESS MODEL	4
7a/Recognized metadata schema (3)	3	contribute everything to NLM PMC (after 6 months for JN)	https://www.jneurosci.org/content/rights-permissions	2020-06-27
7b/Metadata is OA (3)	3	OAI-PMH via PMC (after 6 months for JN)	https://www.ncbi.nlm.nih.gov/pmc/tools/oai/	2020-06-27
7c/Permanent identifier (DOI) (3)	3	Sample
7d/Rich metadata (e.g., IP metadata) (2)
7e/DOAJ or PMC metadata contributions (2)	2	PMC contributions (after 6 months for JN)
7/DISCOVERABILITY	11
8a/Accessibility
8b/No mirror journals (4)	4	Only two journals
8c/No lobbying against OA policies (4)	4	Literature Review
8d/No mass editorial resignations (4)	4	Literature Review
8e/No Non-Disclosure Agreements (4)	4	Costs available on pages	https://www.jneurosci.org/content/subscriptions/cost	2020-06-27
8f/Free text mining for scholars (3)	3	All in PMC: Researchers interested in text mining can download complete collections or retrieve select articles based on a given topic or search. Please note that not all of the articles in PMC are available for this type of bulk download and reuse.	https://www.ncbi.nlm.nih.gov/pmc/tools/textmining/	2020-06-27
8/BUSINESS PRACTICES	19
9a/Member of COPE (5)	0		COPE member list as of	2020-06-27
9b/Waives APCs (4)	4	Discounts available; waivers difficult to get ("All publication fees will be discounted 75% for authors from Category I countries, and will be reduced 50% for authors from countries in Categories II and III.")	https://www.jneurosci.org/content/information-authors#fees	2020-06-27	https://www.eneuro.org/content/general-information#fees	2020-06-27
9c/Table or Illus rights statements (3)
9d/Author reuse of table or illus (3)	3	CC BY license
9e/ETD Permissions (3)	3	CC BY license
9f/ Preservation (3)	3	CLOCKSS	https://clockss.org/community/participating-publishers/	2020-06-27
9g/ Color image charges (3)	3	could not find any additional charges for color	https://www.jneurosci.org/content/information-authors#fees	2020-06-27
9h/ Submission Fee <$150 (3)	3	JN fee of $140
9i/ ORCIDs for Authors (2)	0	Not required, not identified on bib page	https://www.jneurosci.org/content/40/14/2882	2020-06-27	https://www.jneurosci.org/content/40/15/3104	2020-06-27
9j/ Pre-prints allowed (2)	2	Posting to a preprint server such as bioRxiv, Authorea, Open Science Framework, etc. is not considered prior publication.	https://www.jneurosci.org/content/information-authors#fees	2020-06-27	https://www.eneuro.org/content/general-information#policies	2020-06-27
9/ PUBLISHING PRACTICES	21
TOTAL 1-9	67
